# Supplementary material for: Heat Stress-Induced PI3K/mTORC2-Dependent AKT Signaling Is a Central Mediator of Hepatocellular Carcinoma Survival to Thermal Ablation Induced Heat Stress
Source: PLoS One. 2016 Sep 9;11(9):e0162634. doi: 10.1371/journal.pone.0162634 (PMC5017586; doi:10.1371/journal.pone.0162634)
Supplement: S1 File — (XLSX) [file pone.0162634.s018.xlsx]

## Sheet: original_data
probeset	Woo010008_9_A1.expr	Woo010009_9_A2.expr	Woo010010_9_A3.expr	Woo010011_9_A4.expr	Woo010000_N_A1.expr	Woo010001_N_A2.expr	Woo010002_N_A3.expr	Woo010003_N_A4.expr	Woo010008_9_A1.call	Woo010009_9_A2.call	Woo010010_9_A3.call	Woo010011_9_A4.call	Woo010000_N_A1.call	Woo010001_N_A2.call	Woo010002_N_A3.call	Woo010003_N_A4.call	GeneChip Array	Species Scientific Name	Annotation Date	Sequence Type	Sequence Source	Transcript ID(Array Design)	Target Description	Representative Public ID	Archival UniGene Cluster	UniGene ID	Genome Version	Alignments	Gene Title	Gene Symbol	Chromosomal Location	Unigene Cluster Type	Ensembl	Entrez Gene	SwissProt	EC	OMIM	RefSeq Protein ID	RefSeq Transcript ID	FlyBase	AGI	WormBase	MGI Name	RGD Name	SGD accession number	Gene Ontology Biological Process	Gene Ontology Cellular Component	Gene Ontology Molecular Function	Pathway
1367452_at	13.3761	13.4441	13.4145	13.4676	13.4998	13.6204	13.4168	13.5055	P	P	P	P	P	P	P	P	Rat Expression Array 230 2.0	Rattus norvegicus	2011-06-09	Consensus sequence	GenBank	Rn.5958.1	gb:NM_133594.1 /DB_XREF=gi:19424297 /GEN=Smt3h2 /FEA=FLmRNA /CNT=51 /TID=Rn.5958.1 /TIER=FL+Stack /STK=35 /UG=Rn.5958 /DEF=Rattus norvegicus SMT3 suppressor of mif two 3 homolog 2 (yeast) (Smt3h2), mRNA. /PROD=SMT3 suppressor of mif two 3 homolog 2 (yeast) /FL=gb:NM_133594.1 gb:L79949.1	NM_133594	Rn.5958	Rn.154659	November 2004 (Baylor College of Medicine HGSC Rnor3.4)	chr11:81379733-81380800 (+) // 87.46 // q14.1 /// chr5:15325450-15326435 (+) // 94.08 // p15.1 /// chr10:105608080-105619551 (-) // 87.46 // q24.33 /// chr6:108168518-108169170 (-) // 64.26 // q21	SMT3 suppressor of mif two 3 homolog 2 (S. cerevisiae)	Sumo2	chr10q32.3	full length	ENSRNOG00000003670	690244	P61959	---	---	NP_598278	NM_133594	---	---	---	---	---	---	0016481 // negative regulation of transcription // inferred from mutant phenotype /// 0016925 // protein sumoylation // inferred from direct assay /// 0034613 // cellular protein localization // inferred from direct assay	0005634 // nucleus // inferred from electronic annotation	0005515 // protein binding // inferred from physical interaction /// 0016564 // transcription repressor activity // inferred from mutant phenotype /// 0031625 // ubiquitin protein ligase binding // inferred from sequence or structural similarity	---
1367453_at	10.8768	10.9064	11.0333	10.9285	11.4418	11.6168	11.5865	11.5008	P	P	P	P	P	P	P	P	Rat Expression Array 230 2.0	Rattus norvegicus	2011-06-09	Consensus sequence	GenBank	Rn.17982.1	gb:NM_053743.1 /DB_XREF=gi:16758569 /GEN=Cdc37 /FEA=FLmRNA /CNT=31 /TID=Rn.17982.1 /TIER=FL+Stack /STK=25 /UG=Rn.17982 /LL=114562 /DEF=Rattus norvegicus CDC37 (cell division cycle 37, S. cerevisiae, homolog) (Cdc37), mRNA. /PROD=CDC37 (cell division cycle 37, S. cerevisiae,homolog) /FL=gb:D26564.1 gb:NM_053743.1	NM_053743	Rn.17982	Rn.17982	November 2004 (Baylor College of Medicine HGSC Rnor3.4)	chr8:20164143-20176771 (-) // 99.57 // p21.3	cell division cycle 37 homolog (S. cerevisiae)	Cdc37	chr8q13	full length	ENSRNOG00000033426	114562	D3ZA91 /// Q63692	---	---	NP_446195	NM_053743	---	---	---	---	---	---	0051726 // regulation of cell cycle // inferred from expression pattern /// 0060334 // regulation of interferon-gamma-mediated signaling pathway // not recorded /// 0060338 // regulation of type I interferon-mediated signaling pathway // not recorded	0005737 // cytoplasm // inferred from electronic annotation /// 0005737 // cytoplasm // not recorded /// 0005829 // cytosol // not recorded	0005515 // protein binding // not recorded /// 0031072 // heat shock protein binding // not recorded /// 0051879 // Hsp90 protein binding // not recorded	---
1367454_at	11.7075	11.7091	11.8404	11.866	10.6095	10.6868	10.695	10.6118	P	P	P	P	P	P	P	P	Rat Expression Array 230 2.0	Rattus norvegicus	2011-06-09	Consensus sequence	GenBank	Rn.37178.1	gb:NM_021765.1 /DB_XREF=gi:11120715 /GEN=Copb /FEA=FLmRNA /CNT=22 /TID=Rn.37178.1 /TIER=FL+Stack /STK=17 /UG=Rn.37178 /LL=60384 /DEF=Rattus norvegicus beta prime COP (Copb), mRNA. /PROD=beta prime COP /FL=gb:NM_021765.1 gb:AF002705.1	NM_021765	Rn.37178	Rn.37178	November 2004 (Baylor College of Medicine HGSC Rnor3.4)	---	coatomer protein complex, subunit beta 2 (beta prime)	Copb2	---	full length	---	60384	O35142 /// P97704 /// Q5M7X1	---	---	NP_068533	NM_021765	---	---	---	---	---	---	0006810 // transport // inferred from electronic annotation /// 0006886 // intracellular protein transport // inferred from electronic annotation /// 0006890 // retrograde vesicle-mediated transport, Golgi to ER // not recorded /// 0006891 // intra-Golgi vesicle-mediated transport // not recorded /// 0015031 // protein transport // inferred from electronic annotation /// 0016044 // cellular membr…	0000139 // Golgi membrane // inferred from direct assay /// 0000139 // Golgi membrane // inferred from electronic annotation /// 0005737 // cytoplasm // inferred from electronic annotation /// 0005794 // Golgi apparatus // not recorded /// 0005794 // Golgi apparatus // inferred from electronic annotation /// 0005829 // cytosol // not recorded /// 0016020 // membrane // inferred from electronic an…	0005080 // protein kinase C binding // inferred from physical interaction /// 0005198 // structural molecule activity // inferred from electronic annotation /// 0005488 // binding // inferred from electronic annotation /// 0005515 // protein binding // inferred from physical interaction /// 0005515 // protein binding // not recorded /// 0005515 // protein binding // inferred from electronic annot…	---
1367455_at	12.8048	12.8297	12.7582	12.8001	12.5123	12.647	12.5645	12.6577	P	P	P	P	P	P	P	P	Rat Expression Array 230 2.0	Rattus norvegicus	2011-06-09	Consensus sequence	GenBank	Rn.3820.1	gb:NM_053864.1 /DB_XREF=gi:17865350 /GEN=Vcp /FEA=FLmRNA /CNT=53 /TID=Rn.3820.1 /TIER=FL+Stack /STK=16 /UG=Rn.3820 /LL=116643 /DEF=Rattus norvegicus valosin-containing protein (Vcp), mRNA. /PROD=valosin-containing protein /FL=gb:NM_053864.1 gb:U11760.1	NM_053864	Rn.3820	Rn.98891	November 2004 (Baylor College of Medicine HGSC Rnor3.4)	chr5:59472100-59491532 (-) // 98.58 // q12.1	valosin-containing protein	Vcp	chr5q22	full length	ENSRNOG00000034242	116643	P46462	---	---	NP_446316	NM_053864	---	---	---	---	---	---	0006302 // double-strand break repair // inferred from electronic annotation /// 0006302 // double-strand break repair // not recorded /// 0006511 // ubiquitin-dependent protein catabolic process // not recorded /// 0006511 // ubiquitin-dependent protein catabolic process // inferred from electronic annotation /// 0006810 // transport // inferred from electronic annotation /// 0006888 // ER to Go…	0000502 // proteasome complex // inferred from electronic annotation /// 0000502 // proteasome complex // not recorded /// 0005634 // nucleus // inferred from electronic annotation /// 0005634 // nucleus // not recorded /// 0005730 // nucleolus // not recorded /// 0005737 // cytoplasm // inferred from electronic annotation /// 0005737 // cytoplasm // not recorded /// 0005783 // endoplasmic reticu…	0000166 // nucleotide binding // inferred from electronic annotation /// 0005488 // binding // inferred from electronic annotation /// 0005515 // protein binding // inferred from direct assay /// 0005515 // protein binding // inferred from physical interaction /// 0005515 // protein binding // not recorded /// 0005515 // protein binding // inferred from electronic annotation /// 0005524 // ATP bi…	---
1367456_at	12.5682	12.5696	12.6247	12.615	12.4768	12.5179	12.4382	12.4096	P	P	P	P	P	P	P	P	Rat Expression Array 230 2.0	Rattus norvegicus	2011-06-09	Consensus sequence	GenBank	Rn.2778.1	gb:NM_031237.1 /DB_XREF=gi:13676842 /GEN=Ube2d3 /FEA=FLmRNA /CNT=47 /TID=Rn.2778.1 /TIER=FL+Stack /STK=11 /UG=Rn.2778 /LL=81920 /DEF=Rattus norvegicus ubiquitin-conjugating enzyme E2D 3 (homologous to yeast UBC45) (Ube2d3), mRNA. /PROD=ubiquitin-conjugating enzyme E2D 3 (homologousto yeast UBC45) /FL=gb:NM_031237.1 gb:AB006852.1 gb:U13175.1	NM_031237	Rn.2778	Rn.2778	November 2004 (Baylor College of Medicine HGSC Rnor3.4)	chr2:232943213-232971640 (+) // 99.86 // q37.1	ubiquitin-conjugating enzyme E2D 3 (UBC4/5 homolog, yeast)	Ube2d3	chr2q43	full length	ENSRNOG00000013741	81920	D3ZXI9 /// P61078 /// P62839	EC:6.3.2.19	---	NP_112516	NM_031237	---	---	---	---	---	---	0000209 // protein polyubiquitination // not recorded /// 0000209 // protein polyubiquitination // inferred from sequence or structural similarity /// 0006281 // DNA repair // inferred from electronic annotation /// 0006511 // ubiquitin-dependent protein catabolic process // inferred from direct assay /// 0006513 // protein monoubiquitination // not recorded /// 0006915 // apoptosis // inferred f…	0005768 // endosome // inferred from electronic annotation /// 0005886 // plasma membrane // inferred from electronic annotation /// 0010008 // endosome membrane // inferred from electronic annotation /// 0016020 // membrane // inferred from electronic annotation	0000166 // nucleotide binding // inferred from electronic annotation /// 0004842 // ubiquitin-protein ligase activity // inferred from direct assay /// 0004842 // ubiquitin-protein ligase activity // not recorded /// 0004842 // ubiquitin-protein ligase activity // inferred from sequence or structural similarity /// 0004842 // ubiquitin-protein ligase activity // inferred from electronic annotatio…	---
1367457_at	10.7358	10.5986	10.7303	10.8105	11.279	11.294	11.3539	11.252	P	P	P	P	P	P	P	P	Rat Expression Array 230 2.0	Rattus norvegicus	2011-06-09	Consensus sequence	GenBank	Rn.2776.1	gb:NM_053739.1 /DB_XREF=gi:16758561 /GEN=Becn1 /FEA=FLmRNA /CNT=20 /TID=Rn.2776.1 /TIER=FL+Stack /STK=10 /UG=Rn.2776 /LL=114558 /DEF=Rattus norvegicus beclin 1 (coiled-coil, myosin-like BCL2-interacting protein) (Becn1), mRNA. /PROD=beclin 1 (coiled-coil, myosin-likeBCL2-interacting protein) /FL=gb:AY033824.1 gb:NM_053739.1	NM_053739	Rn.2776	Rn.2776	November 2004 (Baylor College of Medicine HGSC Rnor3.4)	chr10:90317956-90332861 (-) // 96.86 // q23.31	beclin 1, autophagy related	Becn1	chr10q32.1	full length	ENSRNOG00000020513	114558	Q91XJ1	---	---	NP_001029289 /// NP_446191	NM_001034117 /// NM_053739	---	---	---	---	---	---	0000045 // autophagic vacuole assembly // inferred from mutant phenotype /// 0006914 // autophagy // inferred from expression pattern /// 0006914 // autophagy // inferred from mutant phenotype /// 0006914 // autophagy // not recorded /// 0006914 // autophagy // inferred from electronic annotation /// 0008285 // negative regulation of cell proliferation // inferred from electronic annotation /// 0…	0005737 // cytoplasm // inferred from electronic annotation /// 0005737 // cytoplasm // not recorded /// 0005794 // Golgi apparatus // inferred from electronic annotation /// 0005802 // trans-Golgi network // inferred from electronic annotation /// 0005802 // trans-Golgi network // not recorded /// 0016020 // membrane // inferred from electronic annotation /// 0016023 // cytoplasmic membrane-boun…	0005515 // protein binding // inferred from electronic annotation /// 0005515 // protein binding // not recorded	---
1367458_at	6.13232	5.87299	5.58104	5.85532	7.27099	7.21902	7.72538	7.35652	P	P	P	P	P	P	P	P	Rat Expression Array 230 2.0	Rattus norvegicus	2011-06-09	Consensus sequence	GenBank	Rn.8586.1	gb:NM_031342.1 /DB_XREF=gi:13786177 /GEN=Lypla2 /FEA=FLmRNA /CNT=14 /TID=Rn.8586.1 /TIER=FL /STK=4 /UG=Rn.8586 /LL=83510 /DEF=Rattus norvegicus lysophospholipase II (Lypla2), mRNA. /PROD=lysophospholipase II /FL=gb:NM_031342.1 gb:AB021645.1	NM_031342	Rn.8586	Rn.8586	November 2004 (Baylor College of Medicine HGSC Rnor3.4)	chr5:154750406-154755029 (-) // 98.61 // q33.2	lysophospholipase 2	Lypla2	chr5q36	full length	ENSRNOG00000010067	83510	Q9QYL8	EC:3.1.1.5	---	NP_112632	NM_031342	---	---	---	---	---	---	0006629 // lipid metabolic process // inferred from electronic annotation /// 0006631 // fatty acid metabolic process // inferred from electronic annotation	0005737 // cytoplasm // inferred from electronic annotation	0016787 // hydrolase activity // inferred from electronic annotation	---
1367459_at	13.1681	13.1794	13.0952	13.2744	12.6936	12.8423	12.7698	12.8004	P	P	P	P	P	P	P	P	Rat Expression Array 230 2.0	Rattus norvegicus	2011-06-09	Consensus sequence	GenBank	Rn.1391.1	gb:BE329198 /DB_XREF=gi:9202974 /DB_XREF=hq38b08.x1 /CLONE=IMAGE:3121623 /FEA=FLmRNA /CNT=82 /TID=Rn.1391.1 /TIER=Stack /STK=9 /UG=Rn.1391 /LL=64310 /UG_GENE=Arf1 /UG_TITLE=ADP-ribosylation factor 1 /FL=gb:NM_022518.1 gb:L12380.1	BE329198	Rn.1391	Rn.93735	November 2004 (Baylor College of Medicine HGSC Rnor3.4)	chr10:45515761-45532130 (-) // 97.61 // q11.21	ADP-ribosylation factor 1	Arf1	chr10q22	full length	---	64310	P84079	---	---	NP_071963	NM_022518	---	---	---	---	---	---	0006810 // transport // inferred from electronic annotation /// 0006890 // retrograde vesicle-mediated transport, Golgi to ER // not recorded /// 0006892 // post-Golgi vesicle-mediated transport // not recorded /// 0007264 // small GTPase mediated signal transduction // inferred from electronic annotation /// 0015031 // protein transport // inferred from electronic annotation /// 0016044 // cellu…	0000139 // Golgi membrane // not recorded /// 0005622 // intracellular // inferred from electronic annotation /// 0005737 // cytoplasm // inferred from electronic annotation /// 0005794 // Golgi apparatus // inferred from electronic annotation /// 0005794 // Golgi apparatus // not recorded /// 0005829 // cytosol // inferred from electronic annotation /// 0005829 // cytosol // not recorded /// 001…	0000166 // nucleotide binding // inferred from electronic annotation /// 0005515 // protein binding // inferred from electronic annotation /// 0005515 // protein binding // not recorded /// 0005525 // GTP binding // inferred from electronic annotation	---
1367460_at	13.2048	13.2355	13.2657	13.3084	12.2514	12.2432	12.2312	12.2336	P	P	P	P	P	P	P	P	Rat Expression Array 230 2.0	Rattus norvegicus	2011-06-09	Consensus sequence	GenBank	Rn.1441.1	gb:BM387347 /DB_XREF=gi:18187400 /DB_XREF=UI-R-CN1-cjj-c-19-0-UI.s1 /CLONE=UI-R-CN1-cjj-c-19-0-UI /FEA=FLmRNA /CNT=36 /TID=Rn.1441.1 /TIER=Stack /STK=20 /UG=Rn.1441 /LL=29661 /UG_GENE=Gdi2 /UG_TITLE=guanosine diphosphate (GDP) dissociation inhibitor 2 /FL=gb:NM_017276.1	BM387347	Rn.1441	Rn.1441	November 2004 (Baylor College of Medicine HGSC Rnor3.4)	chr17:77843480-77870101 (-) // 99.34 // q25.3	GDP dissociation inhibitor 2	Gdi2	chr17q12.3	full length	ENSRNOG00000018091	29662	D3ZNI1 /// P50399	---	---	NP_058972	NM_017276	---	---	---	---	---	---	0007264 // small GTPase mediated signal transduction // not recorded /// 0015031 // protein transport // inferred from electronic annotation /// 0015031 // protein transport // traceable author statement /// 0016192 // vesicle-mediated transport // inferred from expression pattern /// 0043087 // regulation of GTPase activity // inferred from electronic annotation /// 0050790 // regulation of cata…	0005737 // cytoplasm // inferred from electronic annotation /// 0005794 // Golgi apparatus // not recorded /// 0005829 // cytosol // traceable author statement /// 0009986 // cell surface // not recorded /// 0016020 // membrane // inferred from electronic annotation	0005093 // Rab GDP-dissociation inhibitor activity // inferred from direct assay /// 0005093 // Rab GDP-dissociation inhibitor activity // inferred from electronic annotation /// 0005096 // GTPase activator activity // inferred from electronic annotation /// 0005097 // Rab GTPase activator activity // not recorded /// 0005515 // protein binding // not recorded /// 0031267 // small GTPase binding …	---
1367461_at	11.9167	11.9035	11.9142	11.9328	10.8788	10.8564	10.9773	10.9373	P	P	P	P	P	P	P	P	Rat Expression Array 230 2.0	Rattus norvegicus	2011-06-09	Consensus sequence	GenBank	Rn.4327.1	gb:NM_080781.1 /DB_XREF=gi:18158448 /GEN=Copb1 /FEA=FLmRNA /CNT=30 /TID=Rn.4327.1 /TIER=FL+Stack /STK=14 /UG=Rn.4327 /LL=114023 /DEF=Rattus norvegicus coatomer protein complex, subunit beta 1 (Copb1), mRNA. /PROD=coatomer protein complex, subunit beta 1 /FL=gb:NM_080781.1	NM_080781	Rn.4327	Rn.4327	November 2004 (Baylor College of Medicine HGSC Rnor3.4)	chr1:172199669-172233088 (-) // 97.92 // q24.3	coatomer protein complex, subunit beta 1	Copb1	chr1q34	full length	ENSRNOG00000012000	114023	P23514	---	---	NP_542959	NM_080781	---	---	---	---	---	---	0006810 // transport // inferred from electronic annotation /// 0006886 // intracellular protein transport // inferred from electronic annotation /// 0006890 // retrograde vesicle-mediated transport, Golgi to ER // not recorded /// 0006890 // retrograde vesicle-mediated transport, Golgi to ER // traceable author statement /// 0006891 // intra-Golgi vesicle-mediated transport // inferred from dire…	0000139 // Golgi membrane // inferred from electronic annotation /// 0005737 // cytoplasm // inferred from electronic annotation /// 0005794 // Golgi apparatus // inferred from direct assay /// 0005794 // Golgi apparatus // not recorded /// 0005794 // Golgi apparatus // inferred from electronic annotation /// 0005798 // Golgi-associated vesicle // inferred from direct assay /// 0005829 // cytosol…	0005198 // structural molecule activity // inferred from electronic annotation /// 0005488 // binding // inferred from electronic annotation /// 0005515 // protein binding // inferred from physical interaction /// 0005515 // protein binding // not recorded /// 0005515 // protein binding // inferred from electronic annotation	---
1367462_at	11.1822	11.2134	11.4774	11.1874	9.98111	10.1603	10.2849	10.3367	P	P	P	P	P	P	P	P	Rat Expression Array 230 2.0	Rattus norvegicus	2011-06-09	Consensus sequence	GenBank	Rn.3430.1	gb:U10861.1 /DB_XREF=gi:505657 /FEA=FLmRNA /CNT=39 /TID=Rn.3430.1 /TIER=FL+Stack /STK=7 /UG=Rn.3430 /LL=29156 /UG_GENE=Capns1 /DEF=Rattus norvegicus calpain small subunit mRNA, complete cds. /PROD=calpain small subunit /FL=gb:U10861.1	U10861	Rn.3430	Rn.3430	November 2004 (Baylor College of Medicine HGSC Rnor3.4)	chr1:85520530-85525920 (+) // 41.87 // p22.3	calpain, small subunit 1	Capns1	chr1q21	full length	---	29156	Q64537	EC:3.4.22.17	---	NP_058814	NM_017118	---	---	---	---	---	---	0006508 // proteolysis // inferred from mutant phenotype /// 0008152 // metabolic process // not recorded	0005634 // nucleus // inferred from electronic annotation /// 0005634 // nucleus // not recorded /// 0005737 // cytoplasm // inferred from electronic annotation /// 0005737 // cytoplasm // not recorded /// 0005886 // plasma membrane // inferred from electronic annotation /// 0016020 // membrane // inferred from electronic annotation	0004198 // calcium-dependent cysteine-type endopeptidase activity // inferred from direct assay /// 0004198 // calcium-dependent cysteine-type endopeptidase activity // not recorded /// 0004198 // calcium-dependent cysteine-type endopeptidase activity // inferred from electronic annotation /// 0005509 // calcium ion binding // traceable author statement /// 0005509 // calcium ion binding // infer…	Integrin-mediated_cell_adhesion_KEGG // GenMAPP
1367463_at	11.7189	11.6856	11.6746	11.7161	12.7087	12.8503	12.6205	12.694	P	P	P	P	P	P	P	P	Rat Expression Array 230 2.0	Rattus norvegicus	2011-06-09	Consensus sequence	GenBank	Rn.3235.1	gb:AI235510 /DB_XREF=gi:3829016 /DB_XREF=EST232072 /CLONE=ROVCS86 /FEA=mRNA /CNT=29 /TID=Rn.3235.1 /TIER=Stack /STK=23 /UG=Rn.3235 /UG_TITLE=B-cell receptor associated protein 37 (BAP-37) mRNA, partial cds and 3 untranslated sequence	AI235510	Rn.3235	Rn.64535	November 2004 (Baylor College of Medicine HGSC Rnor3.4)	chr4:160837782-160839930 (+) // 96.01 // q32.1	prohibitin 2	Phb2	chr4q42	full length	---	114766	D4A278 /// Q5XIH7	---	---	NP_001013053	NM_001013035	---	---	---	---	---	---	0006350 // transcription // inferred from electronic annotation /// 0016481 // negative regulation of transcription // not recorded /// 0033147 // negative regulation of estrogen receptor signaling pathway // inferred from electronic annotation /// 0033147 // negative regulation of estrogen receptor signaling pathway // not recorded /// 0033600 // negative regulation of mammary gland epithelial c…	0005634 // nucleus // not recorded /// 0005634 // nucleus // inferred from sequence or structural similarity /// 0005634 // nucleus // inferred from electronic annotation /// 0005737 // cytoplasm // inferred from electronic annotation /// 0005739 // mitochondrion // inferred from electronic annotation /// 0005739 // mitochondrion // not recorded /// 0005743 // mitochondrial inner membrane // not …	0004872 // receptor activity // inferred from electronic annotation /// 0005515 // protein binding // inferred from electronic annotation /// 0005515 // protein binding // not recorded /// 0016566 // specific transcriptional repressor activity // not recorded /// 0016566 // specific transcriptional repressor activity // inferred from sequence or structural similarity /// 0016566 // specific trans…	---
1367464_at	10.7657	10.789	10.9129	10.9427	10.7034	10.7814	10.7242	10.7745	P	P	P	P	P	P	P	P	Rat Expression Array 230 2.0	Rattus norvegicus	2011-06-09	Consensus sequence	GenBank	Rn.21553.1	gb:AI598391 /DB_XREF=gi:4607439 /DB_XREF=EST250094 /CLONE=REMDQ63 /FEA=mRNA /CNT=15 /TID=Rn.21553.1 /TIER=Stack /STK=11 /UG=Rn.21553 /LL=84401 /UG_GENE=Siahbp1 /UG_TITLE=siah binding protein 1; FBP interacting repressor; pyrimidine tract binding splicing factor; Ro ribonucleoprotein-binding protein 1	AI598391	Rn.21553	Rn.96174	November 2004 (Baylor College of Medicine HGSC Rnor3.4)	chr7:114101207-114112120 (-) // 94.96 // q31.1	poly-U binding splicing factor 60	Puf60	chr7q34	---	ENSRNOG00000009960	84401	Q9WV25	---	---	NP_001178809 /// XP_001057313 /// XP_001070780 /// XP_001071005 /// XP_343269	NM_001191880 /// XM_001057313 /// XM_001070780 /// XM_001071005 /// XM_343268	---	---	---	---	---	---	0006350 // transcription // inferred from electronic annotation /// 0006397 // mRNA processing // inferred from electronic annotation /// 0006915 // apoptosis // inferred from electronic annotation /// 0008380 // RNA splicing // inferred from electronic annotation /// 0045449 // regulation of transcription // inferred from electronic annotation	0005634 // nucleus // inferred from electronic annotation /// 0019907 // cyclin-dependent protein kinase activating kinase holoenzyme complex // inferred from electronic annotation /// 0019907 // cyclin-dependent protein kinase activating kinase holoenzyme complex // not recorded /// 0030529 // ribonucleoprotein complex // inferred from electronic annotation	0000166 // nucleotide binding // inferred from electronic annotation /// 0003676 // nucleic acid binding // inferred from electronic annotation /// 0003677 // DNA binding // inferred from electronic annotation /// 0003723 // RNA binding // inferred from electronic annotation /// 0005515 // protein binding // inferred from electronic annotation /// 0005515 // protein binding // not recorded	---
1367465_at	11.3328	11.2923	11.5587	11.4604	10.7662	10.8927	10.8085	10.6979	P	P	P	P	P	P	P	P	Rat Expression Array 230 2.0	Rattus norvegicus	2011-06-09	Consensus sequence	GenBank	Rn.7262.1	gb:AI013627 /DB_XREF=gi:3227683 /DB_XREF=EST208302 /CLONE=RSPBP78 /FEA=DNA /CNT=22 /TID=Rn.7262.1 /TIER=Stack /STK=19 /UG=Rn.7262 /UG_TITLE=Rattus norvegicus DAD-1 gene	AI013627	Rn.7262	Rn.7262	November 2004 (Baylor College of Medicine HGSC Rnor3.4)	chr15:32285590-32305858 (-) // 99.84 // q13.3	defender against cell death 1	Dad1	chr15p13	full length	ENSRNOG00000009090	192275	P61805	EC:2.4.1.119	---	NP_620265	NM_138910	---	---	---	---	---	---	0001824 // blastocyst development // inferred from electronic annotation /// 0001824 // blastocyst development // not recorded /// 0006915 // apoptosis // inferred from electronic annotation /// 0006916 // anti-apoptosis // inferred from electronic annotation /// 0006916 // anti-apoptosis // not recorded /// 0007584 // response to nutrient // inferred from expression pattern /// 0042493 // respon…	0016020 // membrane // inferred from electronic annotation /// 0016021 // integral to membrane // inferred from electronic annotation	0004579 // dolichyl-diphosphooligosaccharide-protein glycotransferase activity // inferred from electronic annotation /// 0016740 // transferase activity // inferred from electronic annotation	---
1367466_at	10.9626	11.2243	11.3458	11.1585	11.4672	11.483	11.5793	11.5305	P	P	P	P	P	P	P	P	Rat Expression Array 230 2.0	Rattus norvegicus	2011-06-09	Consensus sequence	GenBank	Rn.897.1	gb:AI406518 /DB_XREF=gi:4250022 /DB_XREF=EST234804 /CLONE=RBRDL35 /FEA=EST /CNT=49 /TID=Rn.897.1 /TIER=Stack /STK=47 /UG=Rn.897 /UG_TITLE=ESTs, Moderately similar to C50C3.6.p (Caenorhabditis elegans) (C.elegans)	AI406518	Rn.897	Rn.106432	November 2004 (Baylor College of Medicine HGSC Rnor3.4)	chr10:62830340-62830938 (+) // 91.15 // q21.2	PRP8 pre-mRNA processing factor 8 homolog (S. cerevisiae)	Prpf8	chr10q24	---	ENSRNOG00000003495	287530	D3ZPD4 /// Q4FZS3	---	---	NP_001178519 /// XP_001080695 /// XP_002724565 /// XP_002727822 /// XP_213385	NM_001191590 /// XM_001080695 /// XM_002724519 /// XM_002727776 /// XM_213385	---	---	---	---	---	---	0000398 // nuclear mRNA splicing, via spliceosome // inferred from electronic annotation /// 0008380 // RNA splicing // not recorded	0005681 // spliceosomal complex // inferred from electronic annotation	0005515 // protein binding // inferred from electronic annotation /// 0005515 // protein binding // not recorded	---
1367467_at	11.3417	11.3537	11.419	11.3636	10.8468	10.9718	10.8728	10.761	P	P	P	P	P	P	P	P	Rat Expression Array 230 2.0	Rattus norvegicus	2011-06-09	Consensus sequence	GenBank	Rn.121.1	gb:BG380638 /DB_XREF=gi:13305110 /DB_XREF=UI-R-CT0-btz-f-07-0-UI.s1 /CLONE=UI-R-CT0-btz-f-07-0-UI /FEA=EST /CNT=56 /TID=Rn.121.1 /TIER=Stack /STK=45 /UG=Rn.121 /UG_TITLE=ESTs, Weakly similar to T26931 hypothetical protein Y45F10D.4 - Caenorhabditis elegans (C.elegans)	BG380638	Rn.121	Rn.121	November 2004 (Baylor College of Medicine HGSC Rnor3.4)	chr12:43886431-43892308 (-) // 88.82 // q12	iron-sulfur cluster scaffold homolog (E. coli)	Iscu	chr12q16	full length	ENSRNOG00000000701	288740	B2RZ79	---	---	NP_001099406	NM_001105936	---	---	---	---	---	---	0016226 // iron-sulfur cluster assembly // inferred from electronic annotation	0005737 // cytoplasm // inferred from electronic annotation /// 0005737 // cytoplasm // not recorded /// 0005739 // mitochondrion // inferred from electronic annotation /// 0005739 // mitochondrion // not recorded /// 0005829 // cytosol // inferred from electronic annotation /// 0005829 // cytosol // not recorded	0005506 // iron ion binding // inferred from electronic annotation /// 0005515 // protein binding // not recorded /// 0005515 // protein binding // inferred from electronic annotation /// 0032947 // protein complex scaffold // inferred from electronic annotation /// 0032947 // protein complex scaffold // not recorded /// 0051536 // iron-sulfur cluster binding // inferred from electronic annotation	---
1367468_at	9.86653	9.9478	10.089	9.88335	8.38845	8.75067	8.37017	8.30365	P	P	P	P	P	P	P	P	Rat Expression Array 230 2.0	Rattus norvegicus	2011-06-09	Consensus sequence	GenBank	Rn.1095.1	gb:BM386654 /DB_XREF=gi:18186707 /DB_XREF=UI-R-CN1-cjg-j-09-0-UI.s1 /CLONE=UI-R-CN1-cjg-j-09-0-UI /FEA=EST /CNT=43 /TID=Rn.1095.1 /TIER=Stack /STK=38 /UG=Rn.1095 /UG_TITLE=ESTs, Weakly similar to ZF94_RAT ZINC FINGER PROTEIN 94 (ZFP-94) (ZINC FINGER PROTEIN Y1) (RLZF-Y) (R.norvegicus)	BM386654	Rn.1095	Rn.1095	November 2004 (Baylor College of Medicine HGSC Rnor3.4)	chr3:146710151-146710844 (-) // 98.34 // q24	SCAN domain-containing 1	Scand1	chr3q42	full length	ENSRNOG00000019987	362252	D4A6K0	---	---	NP_001102069	NM_001108599	---	---	---	---	---	---	0006355 // regulation of transcription, DNA-dependent // inferred from electronic annotation /// 0016032 // viral reproduction // inferred from electronic annotation /// 0045941 // positive regulation of transcription // not recorded	0005634 // nucleus // inferred from electronic annotation /// 0005634 // nucleus // not recorded	0003700 // sequence-specific DNA binding transcription factor activity // inferred from electronic annotation /// 0003713 // transcription coactivator activity // not recorded	---
1367469_at	13.9606	13.9538	13.9855	14.0383	13.5797	13.7032	13.5696	13.6362	P	P	P	P	P	P	P	P	Rat Expression Array 230 2.0	Rattus norvegicus	2011-06-09	Consensus sequence	GenBank	Rn.3992.1	gb:BG667162 /DB_XREF=gi:13889084 /DB_XREF=DRA07E03 /CLONE=DRA07E03 /FEA=EST /CNT=59 /TID=Rn.3992.1 /TIER=Stack /STK=32 /UG=Rn.3992 /UG_TITLE=ESTs, Weakly similar to S49172 translation initiation factor eIF-4 gamma (H.sapiens)	BG667162	Rn.3992	Rn.103276	November 2004 (Baylor College of Medicine HGSC Rnor3.4)	chr8:83503449-83503985 (+) // 35.27 // q21.13 /// chr9:29449966-29451443 (+) // 98.33 // p21.1 /// chr1:168830307-168833191 (-) // 98.66 // q24.2 /// chrUn:65783384-65784868 (-) // 97.6 //	eukaryotic translation initiation factor 4, gamma 2	Eif4g2	chr1q33	full length	ENSRNOG00000017158	361628	Q1RP76 /// Q5BJU2	---	---	NP_001017374	NM_001017374	---	---	---	---	---	---	0006446 // regulation of translational initiation // not recorded /// 0016070 // RNA metabolic process // inferred from electronic annotation /// 0045948 // positive regulation of translational initiation // not recorded	0005737 // cytoplasm // not recorded /// 0016281 // eukaryotic translation initiation factor 4F complex // not recorded	0003743 // translation initiation factor activity // not recorded /// 0005488 // binding // inferred from electronic annotation /// 0005515 // protein binding // inferred from electronic annotation /// 0005515 // protein binding // not recorded /// 0008135 // translation factor activity, nucleic acid binding // not recorded	---
1367470_at	11.8079	11.7518	11.8657	11.9076	11.0722	11.2062	11.1694	11.1048	P	P	P	P	P	P	P	P	Rat Expression Array 230 2.0	Rattus norvegicus	2011-06-09	Consensus sequence	GenBank	Rn.15760.1	gb:AA851321 /DB_XREF=gi:2938861 /DB_XREF=EST194089 /CLONE=RPLAF21 /FEA=EST /CNT=34 /TID=Rn.15760.1 /TIER=Stack /STK=31 /UG=Rn.15760 /UG_TITLE=ESTs, Weakly similar to ARF6_HUMAN ADP-RIBOSYLATION FACTOR 6 (R.norvegicus)	AA851321	Rn.15760	Rn.15760	November 2004 (Baylor College of Medicine HGSC Rnor3.4)	chr20:29059834-29060622 (+) // 95.28 // q11.1	SAR1 homolog A (S. cerevisiae)	Sar1a	chr20q11	full length	ENSRNOG00000000557	361842	Q6AY18	---	---	NP_001007740	NM_001007739	---	---	---	---	---	---	0006810 // transport // inferred from electronic annotation /// 0006886 // intracellular protein transport // inferred from electronic annotation /// 0015031 // protein transport // inferred from electronic annotation /// 0016192 // vesicle-mediated transport // inferred from electronic annotation /// 0016192 // vesicle-mediated transport // not recorded	0005622 // intracellular // inferred from electronic annotation /// 0005783 // endoplasmic reticulum // not recorded /// 0005783 // endoplasmic reticulum // inferred from electronic annotation /// 0005794 // Golgi apparatus // inferred from electronic annotation /// 0016529 // sarcoplasmic reticulum // inferred from electronic annotation /// 0016529 // sarcoplasmic reticulum // not recorded	0000166 // nucleotide binding // inferred from electronic annotation /// 0005525 // GTP binding // inferred from electronic annotation	---
1367471_at	10.9412	11.0666	11.1917	11.1267	12.0212	12.2378	12.0882	12.1252	P	P	P	P	P	P	P	P	Rat Expression Array 230 2.0	Rattus norvegicus	2011-06-09	Consensus sequence	GenBank	Rn.1769.1	gb:BI279090 /DB_XREF=gi:14926572 /DB_XREF=UI-R-DA0-byj-b-03-0-UI.s1 /CLONE=UI-R-DA0-byj-b-03-0-UI /FEA=EST /CNT=38 /TID=Rn.1769.1 /TIER=Stack /STK=30 /UG=Rn.1769 /UG_TITLE=ESTs, Highly similar to RPB5_HUMAN DNA-DIRECTED RNA POLYMERASE II 23 KD POLYPEPTIDE (H.sapiens)	BI279090	Rn.1769	Rn.65038	November 2004 (Baylor College of Medicine HGSC Rnor3.4)	chr7:11179289-11183204 (+) // 94.69 // p21.3	polymerase (RNA) II (DNA directed) polypeptide E	Polr2e	chr7q11	full length	ENSRNOG00000013545	690966	B0BNE2 /// D3ZZV6	EC:2.7.7.6	---	NP_001103084	NM_001109614	---	---	---	---	---	---	0006350 // transcription // inferred from electronic annotation /// 0006366 // transcription from RNA polymerase II promoter // not recorded /// 0006366 // transcription from RNA polymerase II promoter // inferred from sequence or structural similarity /// 0006366 // transcription from RNA polymerase II promoter // inferred from electronic annotation /// 0006367 // transcription initiation from R…	0005634 // nucleus // inferred from electronic annotation /// 0005634 // nucleus // not recorded /// 0005634 // nucleus // inferred from sequence or structural similarity /// 0005654 // nucleoplasm // not recorded /// 0005665 // DNA-directed RNA polymerase II, core complex // not recorded /// 0005665 // DNA-directed RNA polymerase II, core complex // inferred from sequence or structural similarit…	0003677 // DNA binding // inferred from electronic annotation /// 0003899 // DNA-directed RNA polymerase activity // inferred from electronic annotation /// 0004672 // protein kinase activity // not recorded /// 0004672 // protein kinase activity // inferred from sequence or structural similarity /// 0004672 // protein kinase activity // inferred from electronic annotation	---
1367472_at	9.54059	9.50542	9.75909	9.39626	9.8967	10.0902	10.2752	10.1096	P	P	P	P	P	P	P	P	Rat Expression Array 230 2.0	Rattus norvegicus	2011-06-09	Consensus sequence	GenBank	Rn.11800.1	gb:BG153295 /DB_XREF=gi:12665325 /DB_XREF=nag11g11.x1 /CLONE=IMAGE:4176188 /FEA=EST /CNT=38 /TID=Rn.11800.1 /TIER=Stack /STK=28 /UG=Rn.11800 /UG_TITLE=ESTs, Highly similar to I63168 gene Ube1x protein - rat (R.norvegicus)	BG153295	Rn.11800	Rn.11800	November 2004 (Baylor College of Medicine HGSC Rnor3.4)	chrX:12925975-12926771 (-) // 84.47 // p22.2	ubiquitin-like modifier activating enzyme 1	Uba1	chrXq12	full length	ENSRNOG00000019164	314432	Q5U300	EC:6.3.2.19	---	NP_001014102	NM_001014080	---	---	---	---	---	---	0006464 // protein modification process // inferred from electronic annotation /// 0008152 // metabolic process // inferred from electronic annotation	---	0000166 // nucleotide binding // inferred from electronic annotation /// 0003824 // catalytic activity // inferred from electronic annotation /// 0005488 // binding // inferred from electronic annotation /// 0005515 // protein binding // inferred from electronic annotation /// 0005515 // protein binding // not recorded /// 0005524 // ATP binding // inferred from electronic annotation /// 0008641 …	---
1367473_at	11.4505	11.5066	11.6509	11.5537	11.9028	11.973	11.9821	11.9384	P	P	P	P	P	P	P	P	Rat Expression Array 230 2.0	Rattus norvegicus	2011-06-09	Consensus sequence	GenBank	Rn.3119.1	gb:BI284237 /DB_XREF=gi:14936738 /DB_XREF=UI-R-CX0s-ccn-g-09-0-UI.s1 /CLONE=UI-R-CX0s-ccn-g-09-0-UI /FEA=EST /CNT=39 /TID=Rn.3119.1 /TIER=Stack /STK=28 /UG=Rn.3119 /UG_TITLE=ESTs	BI284237	Rn.3119	Rn.3119	November 2004 (Baylor College of Medicine HGSC Rnor3.4)	chr7:117913214-117914961 (+) // 99.9 // q31.31	translocase of outer mitochondrial membrane 22 homolog (yeast)	Tomm22	chr7q34	full length	ENSRNOG00000014058	300075	Q75Q41	---	---	NP_997679	NM_212514	---	---	---	---	---	---	0006810 // transport // inferred from electronic annotation /// 0006886 // intracellular protein transport // inferred from electronic annotation /// 0015031 // protein transport // inferred from electronic annotation /// 0055085 // transmembrane transport // inferred from electronic annotation /// 0070096 // mitochondrial outer membrane translocase complex assembly // inferred from electronic an…	0000299 // integral to membrane of membrane fraction // inferred from electronic annotation /// 0000299 // integral to membrane of membrane fraction // not recorded /// 0005739 // mitochondrion // inferred from electronic annotation /// 0005739 // mitochondrion // not recorded /// 0005741 // mitochondrial outer membrane // inferred from electronic annotation /// 0005742 // mitochondrial outer mem…	0004872 // receptor activity // inferred from electronic annotation /// 0005515 // protein binding // inferred from physical interaction /// 0005515 // protein binding // not recorded /// 0005515 // protein binding // inferred from electronic annotation /// 0008320 // protein transmembrane transporter activity // inferred from mutant phenotype	---
1367474_at	10.1403	10.1734	10.2749	10.197	9.8574	9.91278	9.85834	9.91745	P	P	P	P	P	P	P	P	Rat Expression Array 230 2.0	Rattus norvegicus	2011-06-09	Consensus sequence	GenBank	Rn.8469.1	gb:AI231320 /DB_XREF=gi:3815200 /DB_XREF=EST228008 /CLONE=REMDI55 /FEA=EST /CNT=28 /TID=Rn.8469.1 /TIER=Stack /STK=24 /UG=Rn.8469 /UG_TITLE=ESTs, Moderately similar to Y079_HUMAN HYPOTHETICAL PROTEIN KIAA0079 (H.sapiens)	AI231320	Rn.8469	Rn.122667	November 2004 (Baylor College of Medicine HGSC Rnor3.4)	chr15:3827911-3828602 (-) // 97.6 // p13	SEC24 related gene family, member C (S. cerevisiae)	Sec24c	chr15p16	full length	ENSRNOG00000009042	685144	B5DEG8	---	---	NP_001102926	NM_001109456	---	---	---	---	---	---	0006810 // transport // inferred from electronic annotation /// 0006886 // intracellular protein transport // inferred from electronic annotation /// 0006888 // ER to Golgi vesicle-mediated transport // inferred from electronic annotation /// 0006888 // ER to Golgi vesicle-mediated transport // not recorded /// 0015031 // protein transport // inferred from electronic annotation /// 0016044 // cel…	0030127 // COPII vesicle coat // inferred from electronic annotation	0005515 // protein binding // inferred from electronic annotation /// 0005515 // protein binding // not recorded /// 0008270 // zinc ion binding // inferred from electronic annotation	---
1367475_at	12.5157	12.5641	12.6902	12.706	11.9749	12.0397	12.008	12.049	P	P	P	P	P	P	P	P	Rat Expression Array 230 2.0	Rattus norvegicus	2011-06-09	Consensus sequence	GenBank	Rn.2396.1	gb:AI227695 /DB_XREF=gi:4135270 /DB_XREF=EST224390 /CLONE=RBRCK34 /FEA=EST /CNT=38 /TID=Rn.2396.1 /TIER=Stack /STK=21 /UG=Rn.2396 /UG_TITLE=ESTs, Weakly similar to CO1B_RAT CORONIN 1B (CORONIN 2) (R.norvegicus)	AI227695	Rn.2396	Rn.60067	November 2004 (Baylor College of Medicine HGSC Rnor3.4)	chr5:156105000-156106180 (-) // 99.58 // q33.3	cell division cycle 42 (GTP binding protein)	Cdc42	chr5q36	full length	---	64465	Q8CFN2	---	---	NP_741991	NM_171994	---	---	---	---	---	---	0001934 // positive regulation of protein phosphorylation // not recorded /// 0003334 // keratinocyte development // not recorded /// 0006184 // GTP catabolic process // not recorded /// 0007088 // regulation of mitosis // inferred from electronic annotation /// 0007088 // regulation of mitosis // not recorded /// 0007097 // nuclear migration // inferred from electronic annotation /// 0007097 // …	0000139 // Golgi membrane // inferred from direct assay /// 0005622 // intracellular // inferred from electronic annotation /// 0005737 // cytoplasm // not recorded /// 0005829 // cytosol // not recorded /// 0005886 // plasma membrane // inferred from direct assay /// 0005886 // plasma membrane // not recorded /// 0005886 // plasma membrane // inferred from electronic annotation /// 0016020 // me…	0000166 // nucleotide binding // inferred from electronic annotation /// 0003924 // GTPase activity // not recorded /// 0003924 // GTPase activity // traceable author statement /// 0003924 // GTPase activity // inferred from electronic annotation /// 0005515 // protein binding // inferred from physical interaction /// 0005515 // protein binding // not recorded /// 0005515 // protein binding // in…	G13_Signaling_Pathway // GenMAPP /// Integrin-mediated_cell_adhesion_KEGG // GenMAPP
1367476_at	12.1786	12.143	12.0252	12.2235	11.8012	11.8012	11.7729	11.7944	P	P	P	P	P	P	P	P	Rat Expression Array 230 2.0	Rattus norvegicus	2011-06-09	Consensus sequence	GenBank	Rn.1668.1	gb:AA799994 /DB_XREF=gi:2862949 /DB_XREF=EST189491 /CLONE=RHEAI04 /FEA=EST /CNT=43 /TID=Rn.1668.1 /TIER=Stack /STK=20 /UG=Rn.1668 /UG_TITLE=ESTs, Highly similar to S57500 signal recognition particle - mouse (M.musculus)	AA799994	Rn.1668	Rn.1668	November 2004 (Baylor College of Medicine HGSC Rnor3.4)	chr3:104906849-104910512 (-) // 93.88 // q13.11	signal recognition particle 14	Srp14	chr3q35	full length	ENSRNOG00000007512	296076	B2RYW7	---	---	NP_001099967	NM_001106497	---	---	---	---	---	---	0006614 // SRP-dependent cotranslational protein targeting to membrane // inferred from electronic annotation /// 0042493 // response to drug // inferred from electronic annotation /// 0042493 // response to drug // not recorded /// 0045047 // protein targeting to ER // not recorded /// 0045047 // protein targeting to ER // inferred from electronic annotation /// 0045900 // negative regulation of…	0005786 // signal recognition particle, endoplasmic reticulum targeting // inferred from electronic annotation /// 0005786 // signal recognition particle, endoplasmic reticulum targeting // not recorded /// 0048500 // signal recognition particle // inferred from electronic annotation	0005515 // protein binding // inferred from electronic annotation /// 0005515 // protein binding // not recorded /// 0008312 // 7S RNA binding // inferred from electronic annotation /// 0030942 // endoplasmic reticulum signal peptide binding // inferred from electronic annotation	---
1367477_at	9.652	9.70475	9.94267	9.83158	9.28826	9.33005	9.33485	9.27713	P	P	P	P	P	P	P	P	Rat Expression Array 230 2.0	Rattus norvegicus	2011-06-09	Consensus sequence	GenBank	Rn.6046.1	gb:BM386162 /DB_XREF=gi:18186215 /DB_XREF=UI-R-CN1-cjf-k-01-0-UI.s1 /CLONE=UI-R-CN1-cjf-k-01-0-UI /FEA=EST /CNT=22 /TID=Rn.6046.1 /TIER=Stack /STK=20 /UG=Rn.6046 /UG_TITLE=ESTs, Moderately similar to I60307 beta-galactosidase, alpha peptide - Escherichia coli (E.coli)	BM386162	Rn.6046	Rn.6046	November 2004 (Baylor College of Medicine HGSC Rnor3.4)	chr4:117321335-117322212 (+) // 100.0 // q26	mitochondrial ribosomal protein L53	Mrpl53	chr4q34	full length	ENSRNOG00000008477	362388	B2RYW4	---	---	NP_001102105	NM_001108635	---	---	---	---	---	---	---	0005739 // mitochondrion // inferred from electronic annotation /// 0005739 // mitochondrion // not recorded /// 0005840 // ribosome // inferred from electronic annotation	---	---
1367478_at	10.1347	10.2923	10.4883	10.1597	10.2644	10.2646	10.3134	10.2746	P	P	P	P	P	P	P	P	Rat Expression Array 230 2.0	Rattus norvegicus	2011-06-09	Consensus sequence	GenBank	Rn.813.1	gb:AI600136 /DB_XREF=gi:4609184 /DB_XREF=EST251839 /CLONE=REMDU62 /FEA=EST /CNT=22 /TID=Rn.813.1 /TIER=Stack /STK=19 /UG=Rn.813 /UG_TITLE=ESTs, Highly similar to HRA2_MOUSE Serine protease HTRA2 (M.musculus)	AI600136	Rn.813	Rn.107325	November 2004 (Baylor College of Medicine HGSC Rnor3.4)	chr4:117262207-117262761 (-) // 90.6 // q26	HtrA serine peptidase 2	Htra2	chr4q34	full length	ENSRNOG00000022448	297376	B0BNB9	EC:2.4.21.-	---	NP_001100069	NM_001106599	---	---	---	---	---	---	0006508 // proteolysis // inferred from electronic annotation /// 0007005 // mitochondrion organization // inferred from electronic annotation /// 0007005 // mitochondrion organization // not recorded /// 0007628 // adult walking behavior // inferred from electronic annotation /// 0007628 // adult walking behavior // not recorded /// 0008344 // adult locomotory behavior // not recorded /// 000834…	0005739 // mitochondrion // inferred from direct assay /// 0005739 // mitochondrion // not recorded /// 0005739 // mitochondrion // inferred from electronic annotation /// 0005758 // mitochondrial intermembrane space // inferred from electronic annotation /// 0005758 // mitochondrial intermembrane space // not recorded /// 0005829 // cytosol // inferred from direct assay	0003824 // catalytic activity // inferred from electronic annotation /// 0004252 // serine-type endopeptidase activity // inferred from electronic annotation /// 0005515 // protein binding // inferred from electronic annotation /// 0005515 // protein binding // not recorded /// 0008236 // serine-type peptidase activity // inferred from mutant phenotype	---
1367479_at	11.7275	11.7755	11.9489	11.7914	12.3833	12.444	12.3435	12.3719	P	P	P	P	P	P	P	P	Rat Expression Array 230 2.0	Rattus norvegicus	2011-06-09	Consensus sequence	GenBank	Rn.17615.1	gb:AI599994 /DB_XREF=gi:4609042 /DB_XREF=EST251697 /CLONE=REMEK34 /FEA=EST /CNT=24 /TID=Rn.17615.1 /TIER=Stack /STK=19 /UG=Rn.17615 /UG_TITLE=ESTs, Weakly similar to S78745 protein YHR072w-a - yeast (Saccharomyces cerevisiae) (S.cerevisiae)	AI599994	Rn.17615	Rn.17615	November 2004 (Baylor College of Medicine HGSC Rnor3.4)	chr11:22965576-22966024 (+) // 94.43 // p14.3 /// chr3:98105038-98105714 (+) // 95.93 // q11.2	NOP10 ribonucleoprotein homolog (yeast)	Nop10	chr3q34	full length	ENSRNOG00000005184	691534	D3ZMP6	---	---	NP_001119572	NM_001126100	---	---	---	---	---	---	---	---	0005515 // protein binding // not recorded	---
1367480_at	12.0471	12.0829	12.1526	12.1571	12.4268	12.6187	12.5502	12.4909	P	P	P	P	P	P	P	P	Rat Expression Array 230 2.0	Rattus norvegicus	2011-06-09	Consensus sequence	GenBank	Rn.8855.1	gb:AI230248 /DB_XREF=gi:3814135 /DB_XREF=EST226943 /CLONE=REMCU13 /FEA=EST /CNT=23 /TID=Rn.8855.1 /TIER=Stack /STK=18 /UG=Rn.8855 /UG_TITLE=ESTs, Weakly similar to A42811 nuclear RNA helicase (R.norvegicus)	AI230248	Rn.8855	Rn.202617	November 2004 (Baylor College of Medicine HGSC Rnor3.4)	---	eukaryotic translation initiation factor 4A, isoform 3	Eif4a3	---	full length	---	688288	Q3B8Q2	EC:3.6.4.13	---	NP_001093628	NM_001100158	---	---	---	---	---	---	0000184 // nuclear-transcribed mRNA catabolic process, nonsense-mediated decay // inferred from electronic annotation /// 0006364 // rRNA processing // inferred from electronic annotation /// 0006397 // mRNA processing // inferred from electronic annotation /// 0006417 // regulation of translation // inferred from electronic annotation /// 0006810 // transport // inferred from electronic annotati…	0005634 // nucleus // inferred from electronic annotation /// 0005681 // spliceosomal complex // inferred from electronic annotation /// 0005737 // cytoplasm // inferred from electronic annotation /// 0016607 // nuclear speck // inferred from electronic annotation	0000166 // nucleotide binding // inferred from electronic annotation /// 0003676 // nucleic acid binding // inferred from electronic annotation /// 0003723 // RNA binding // inferred from electronic annotation /// 0004386 // helicase activity // inferred from electronic annotation /// 0005524 // ATP binding // inferred from electronic annotation /// 0008026 // ATP-dependent helicase activity // i…	---
1367481_at	9.69547	9.63694	9.90797	9.79332	8.49813	8.61992	8.53483	8.33313	P	P	P	P	P	P	P	P	Rat Expression Array 230 2.0	Rattus norvegicus	2011-06-09	Consensus sequence	GenBank	Rn.36912.1	gb:BI278301 /DB_XREF=gi:14925012 /DB_XREF=UI-R-CY0-bxr-h-02-0-UI.s1 /CLONE=UI-R-CY0-bxr-h-02-0-UI /FEA=EST /CNT=19 /TID=Rn.36912.1 /TIER=Stack /STK=18 /UG=Rn.36912 /UG_TITLE=ESTs, Highly similar to VP28_HUMAN VPS28 protein homolog (H.sapiens)	BI278301	Rn.36912	Rn.36912	November 2004 (Baylor College of Medicine HGSC Rnor3.4)	chr7:114670492-114674252 (-) // 99.89 // q31.2	vacuolar protein sorting 28 homolog (S. cerevisiae)	Vps28	chr7q34	full length	ENSRNOG00000014633	300052	B5DEN9	---	---	NP_001123964	NM_001130492	---	---	---	---	---	---	0006810 // transport // inferred from electronic annotation /// 0015031 // protein transport // inferred from electronic annotation /// 0031397 // negative regulation of protein ubiquitination // not recorded /// 0031397 // negative regulation of protein ubiquitination // inferred from sequence or structural similarity	0005737 // cytoplasm // not recorded /// 0005737 // cytoplasm // inferred from sequence or structural similarity /// 0005737 // cytoplasm // inferred from electronic annotation /// 0005768 // endosome // inferred from electronic annotation /// 0005768 // endosome // not recorded /// 0005829 // cytosol // not recorded /// 0005886 // plasma membrane // inferred from electronic annotation /// 001602…	0005515 // protein binding // not recorded	---
1367482_at	10.7802	10.5664	10.6757	10.861	10.775	10.8512	10.8496	10.7305	P	P	P	P	P	P	P	P	Rat Expression Array 230 2.0	Rattus norvegicus	2011-06-09	Consensus sequence	GenBank	Rn.3964.1	gb:AI172459 /DB_XREF=gi:3712499 /DB_XREF=EST218470 /CLONE=RMUCA14 /FEA=EST /CNT=31 /TID=Rn.3964.1 /TIER=Stack /STK=17 /UG=Rn.3964 /UG_TITLE=ESTs, Weakly similar to T51146 ring-box protein 1 (H.sapiens)	AI172459	Rn.3964	Rn.3964	November 2004 (Baylor College of Medicine HGSC Rnor3.4)	chr10:109988567-109997111 (+) // 97.13 // q25.1	anaphase promoting complex subunit 11	Anapc11	chr10q32.3	full length	ENSRNOG00000036686	498030	D3ZXH8	---	---	NP_001119554	NM_001126082	---	---	---	---	---	---	0016567 // protein ubiquitination // not recorded /// 0031145 // anaphase-promoting complex-dependent proteasomal ubiquitin-dependent protein catabolic process // not recorded /// 0051436 // negative regulation of ubiquitin-protein ligase activity involved in mitotic cell cycle // not recorded /// 0051437 // positive regulation of ubiquitin-protein ligase activity involved in mitotic cell cycle /…	0005654 // nucleoplasm // not recorded /// 0005680 // anaphase-promoting complex // not recorded /// 0005829 // cytosol // not recorded	0004842 // ubiquitin-protein ligase activity // not recorded /// 0005515 // protein binding // inferred from electronic annotation /// 0008270 // zinc ion binding // inferred from electronic annotation /// 0046872 // metal ion binding // inferred from electronic annotation	---
1367483_at	9.68527	9.68327	9.71272	9.70122	10.2412	10.3358	10.1804	10.1407	P	P	P	P	P	P	P	P	Rat Expression Array 230 2.0	Rattus norvegicus	2011-06-09	Consensus sequence	GenBank	Rn.2448.1	gb:AI170657 /DB_XREF=gi:3710697 /DB_XREF=EST216592 /CLONE=RMUAZ56 /FEA=EST /CNT=27 /TID=Rn.2448.1 /TIER=Stack /STK=17 /UG=Rn.2448 /UG_TITLE=ESTs, Weakly similar to T46473 hypothetical protein DKFZp434O1230.1 (H.sapiens)	AI170657	Rn.2448	Rn.2448	November 2004 (Baylor College of Medicine HGSC Rnor3.4)	chr5:93254055-93254989 (-) // 97.12 // q15	similar to RIKEN cDNA 3110001D03	RGD1309148	chr5q31	---	ENSRNOG00000023946	298147	D4AEL3	---	---	XP_001067663 /// XP_216433	XM_001067663 /// XM_216433	---	---	---	---	---	---	---	---	---	---
1367484_at	11.6719	11.5739	11.6561	11.6948	11.8416	11.8879	11.8294	11.8191	P	P	P	P	P	P	P	P	Rat Expression Array 230 2.0	Rattus norvegicus	2011-06-09	Consensus sequence	GenBank	Rn.3348.1	gb:BM391175 /DB_XREF=gi:18191228 /DB_XREF=UI-R-DY0-ckq-g-01-0-UI.s1 /CLONE=UI-R-DY0-ckq-g-01-0-UI /FEA=EST /CNT=23 /TID=Rn.3348.1 /TIER=Stack /STK=17 /UG=Rn.3348 /UG_TITLE=ESTs, Weakly similar to UBIQUITIN-CONJUGATING ENZYME E2-17 KD 3 (R.norvegicus)	BM391175	Rn.3348	Rn.15203	November 2004 (Baylor College of Medicine HGSC Rnor3.4)	chr15:9069117-9071697 (+) // 99.9 // p11.2	ubiquitin-conjugating enzyme E2E 1-like /// ubiquitin-conjugating enzyme E2E 2 (UBC4/5 homolog, yeast)	LOC100366017 /// Ube2e2	chr15p16	full length	ENSRNOG00000008794	100366017 /// 361013	D3ZYE1 /// Q4KLJ5 /// Q6AY98	EC:6.3.2.19	---	NP_001101841 /// XP_002725078	NM_001108371 /// XM_002725032	---	---	---	---	---	---	0032020 // ISG15-protein conjugation // not recorded /// 0043687 // post-translational protein modification // inferred from electronic annotation /// 0051246 // regulation of protein metabolic process // inferred from electronic annotation /// 0070534 // protein K63-linked ubiquitination // not recorded /// 0070936 // protein K48-linked ubiquitination // not recorded /// 0070979 // protein K11-l…	---	0004842 // ubiquitin-protein ligase activity // not recorded /// 0016874 // ligase activity // inferred from electronic annotation /// 0016881 // acid-amino acid ligase activity // inferred from electronic annotation /// 0019787 // small conjugating protein ligase activity // inferred from electronic annotation /// 0042296 // ISG15 ligase activity // not recorded	---
1367485_at	12.2653	12.2011	12.1143	12.2976	12.1386	12.2384	12.1685	12.0611	P	P	P	P	P	P	P	P	Rat Expression Array 230 2.0	Rattus norvegicus	2011-06-09	Consensus sequence	GenBank	Rn.6738.1	gb:BM388871 /DB_XREF=gi:18188924 /DB_XREF=UI-R-DZ0-ckn-m-02-0-UI.s1 /CLONE=UI-R-DZ0-ckn-m-02-0-UI /FEA=EST /CNT=20 /TID=Rn.6738.1 /TIER=Stack /STK=17 /UG=Rn.6738 /UG_TITLE=ESTs	BM388871	Rn.6738	Rn.6738	November 2004 (Baylor College of Medicine HGSC Rnor3.4)	chr15:11881148-11881866 (+) // 86.52 // p11.2 /// chr5:14834047-14834715 (-) // 92.75 // p15.2	transcription elongation factor A (SII) 1	Tcea1	chr5q12	full length	ENSRNOG00000022323	362479	Q4KLL0	---	---	NP_001020906	NM_001025735	---	---	---	---	---	---	0006350 // transcription // inferred from electronic annotation /// 0006354 // RNA elongation // inferred from electronic annotation /// 0006355 // regulation of transcription, DNA-dependent // inferred from electronic annotation /// 0006357 // regulation of transcription from RNA polymerase II promoter // inferred from electronic annotation /// 0030218 // erythrocyte differentiation // inferred …	0005634 // nucleus // inferred from electronic annotation /// 0005654 // nucleoplasm // inferred from electronic annotation /// 0005654 // nucleoplasm // not recorded	0003676 // nucleic acid binding // inferred from electronic annotation /// 0003677 // DNA binding // inferred from electronic annotation /// 0003702 // RNA polymerase II transcription factor activity // inferred from electronic annotation /// 0003711 // transcription elongation regulator activity // inferred from electronic annotation /// 0003746 // translation elongation factor activity // infer…	---
1367486_at	6.70075	6.72407	7.28223	7.24326	7.24832	7.65995	7.33958	6.96631	P	P	P	P	P	P	P	P	Rat Expression Array 230 2.0	Rattus norvegicus	2011-06-09	Consensus sequence	GenBank	Rn.3707.1	gb:BM386412 /DB_XREF=gi:18186465 /DB_XREF=UI-R-CN1-cjf-l-18-0-UI.s1 /CLONE=UI-R-CN1-cjf-l-18-0-UI /FEA=EST /CNT=18 /TID=Rn.3707.1 /TIER=Stack /STK=16 /UG=Rn.3707 /UG_TITLE=ESTs	BM386412	Rn.3707	Rn.3707	November 2004 (Baylor College of Medicine HGSC Rnor3.4)	chr3:75632696-75633343 (+) // 96.14 // p12.3	ADP-ribosylation factor GTPase activating protein 2	Arfgap2	chr3q24	full length	ENSRNOG00000014429	362162	D4A8E3 /// Q3MID3	---	---	NP_001028879	NM_001033707	---	---	---	---	---	---	0006810 // transport // inferred from electronic annotation /// 0015031 // protein transport // inferred from electronic annotation /// 0016192 // vesicle-mediated transport // inferred from electronic annotation /// 0032312 // regulation of ARF GTPase activity // inferred from electronic annotation	0000139 // Golgi membrane // inferred from electronic annotation /// 0005737 // cytoplasm // inferred from electronic annotation /// 0005737 // cytoplasm // not recorded /// 0005794 // Golgi apparatus // inferred from electronic annotation /// 0005794 // Golgi apparatus // not recorded /// 0005886 // plasma membrane // not recorded /// 0016020 // membrane // inferred from electronic annotation	0005096 // GTPase activator activity // inferred from electronic annotation /// 0008060 // ARF GTPase activator activity // inferred from electronic annotation /// 0008270 // zinc ion binding // inferred from electronic annotation /// 0046872 // metal ion binding // inferred from electronic annotation	---
1367487_at	6.13846	6.51568	6.10022	6.24808	7.17348	7.48403	7.3782	6.94581	P	P	P	P	P	P	P	P	Rat Expression Array 230 2.0	Rattus norvegicus	2011-06-09	Consensus sequence	GenBank	Rn.7423.1	gb:BG378610 /DB_XREF=gi:13303082 /DB_XREF=UI-R-CV1-bvr-e-06-0-UI.s1 /CLONE=UI-R-CV1-bvr-e-06-0-UI /FEA=EST /CNT=16 /TID=Rn.7423.1 /TIER=Stack /STK=15 /UG=Rn.7423 /UG_TITLE=ESTs, Moderately similar to B4G3_HUMAN BETA-1,4-GALACTOSYLTRANSFERASE 3 (BETA-1,4-GALTASE 3) (BETA4GAL-T3) (B4GAL-T3) (UDP-GALACTOSE:BETA-N-ACETYLGLUCOSAMINE BETA-1,4-GALACTOSYLTRANSFERASE 3) (UDP-GAL:BETA-GLCNAC BETA-1,4-GALAC…	BG378610	Rn.7423	Rn.91751	November 2004 (Baylor College of Medicine HGSC Rnor3.4)	chr13:87169693-87170388 (+) // 100.0 // q31.1	UDP-Gal:betaGlcNAc beta 1,4-galactosyltransferase, polypeptide 3	B4galt3	chr13q24	full length	ENSRNOG00000003551	494342	Q6P768 /// Q6P773	EC:2.4.1.38 /// EC:2.4.1.90	---	NP_001009539	NM_001009539	---	---	---	---	---	---	0005975 // carbohydrate metabolic process // inferred from electronic annotation /// 0006350 // transcription // inferred from electronic annotation /// 0045449 // regulation of transcription // inferred from electronic annotation	0005634 // nucleus // inferred from electronic annotation /// 0005737 // cytoplasm // inferred from electronic annotation /// 0005737 // cytoplasm // not recorded /// 0005794 // Golgi apparatus // inferred from electronic annotation /// 0005794 // Golgi apparatus // not recorded /// 0016020 // membrane // inferred from electronic annotation /// 0016021 // integral to membrane // inferred from ele…	0003677 // DNA binding // inferred from electronic annotation /// 0003831 // beta-N-acetylglucosaminylglycopeptide beta-1,4-galactosyltransferase activity // inferred from electronic annotation /// 0003945 // N-acetyllactosamine synthase activity // inferred from electronic annotation /// 0005515 // protein binding // inferred from electronic annotation /// 0016740 // transferase activity // infe…	---
1367488_at	10.7362	10.8163	10.8975	10.7373	10.4754	10.5028	10.5493	10.5665	P	P	P	P	P	P	P	P	Rat Expression Array 230 2.0	Rattus norvegicus	2011-06-09	Consensus sequence	GenBank	Rn.17206.1	gb:BM386411 /DB_XREF=gi:18186464 /DB_XREF=UI-R-CN1-cjf-l-16-0-UI.s1 /CLONE=UI-R-CN1-cjf-l-16-0-UI /FEA=EST /CNT=20 /TID=Rn.17206.1 /TIER=Stack /STK=14 /UG=Rn.17206 /UG_TITLE=ESTs, Highly similar to T00353 hypothetical protein KIAA0697 (H.sapiens)	BM386411	Rn.17206	Rn.8442	November 2004 (Baylor College of Medicine HGSC Rnor3.4)	chr14:19381925-19385526 (+) // 100.0 // q11.2	ankyrin repeat domain 17	Ankrd17	chr14p22	full length	ENSRNOG00000002940	289521	D4A0B4 /// Q99MD2	---	---	NP_001099469	NM_001105999	---	---	---	---	---	---	---	---	0003723 // RNA binding // inferred from electronic annotation	---
1367489_at	4.97756	4.84086	5.14492	5.1839	4.71457	4.87967	5.04546	4.92533	P	P	P	P	P	P	P	P	Rat Expression Array 230 2.0	Rattus norvegicus	2011-06-09	Consensus sequence	GenBank	Rn.101.1	gb:BE114147 /DB_XREF=gi:8506252 /DB_XREF=UI-R-BJ1-awj-f-06-0-UI.s1 /CLONE=UI-R-BJ1-awj-f-06-0-UI /FEA=EST /CNT=19 /TID=Rn.101.1 /TIER=Stack /STK=14 /UG=Rn.101 /UG_TITLE=ESTs	BE114147	---	---	November 2004 (Baylor College of Medicine HGSC Rnor3.4)	chr5:160064075-160064909 (+) // 92.94 // q34	---	---	---	---	---	---	---	---	---	---	---	---	---	---	---	---	---	---	---	---	---
1367490_at	7.89033	8.0697	8.33917	8.13505	7.57518	8.13644	7.94289	7.7683	P	P	P	P	P	P	P	P	Rat Expression Array 230 2.0	Rattus norvegicus	2011-06-09	Consensus sequence	GenBank	Rn.12596.1	gb:AI102046 /DB_XREF=gi:3706881 /DB_XREF=EST211335 /CLONE=RBRBY30 /FEA=EST /CNT=17 /TID=Rn.12596.1 /TIER=Stack /STK=14 /UG=Rn.12596 /UG_TITLE=ESTs	AI102046	Rn.12596	Rn.190597	November 2004 (Baylor College of Medicine HGSC Rnor3.4)	---	similar to defective SPErmatogenesis family member (spe-39)	LOC681989	---	full length	---	681989	Q5PQN6	---	---	NP_001094474	NM_001101004	---	---	---	---	---	---	0006810 // transport // inferred from electronic annotation /// 0015031 // protein transport // inferred from electronic annotation	0005737 // cytoplasm // inferred from sequence or structural similarity /// 0005768 // endosome // inferred from electronic annotation /// 0005769 // early endosome // inferred from electronic annotation /// 0005770 // late endosome // inferred from electronic annotation /// 0055037 // recycling endosome // inferred from electronic annotation	---	---
1367491_at	10.8596	10.8536	11.0198	10.992	11.2624	11.2144	11.1985	11.1904	P	P	P	P	P	P	P	P	Rat Expression Array 230 2.0	Rattus norvegicus	2011-06-09	Consensus sequence	GenBank	Rn.3450.1	gb:AI233249 /DB_XREF=gi:3817129 /DB_XREF=EST229937 /CLONE=RKIDC71 /FEA=EST /CNT=16 /TID=Rn.3450.1 /TIER=Stack /STK=14 /UG=Rn.3450 /UG_TITLE=ESTs	AI233249	Rn.3450	Rn.103083	November 2004 (Baylor College of Medicine HGSC Rnor3.4)	chr3:78819628-78820172 (-) // 94.24 // p12.3	apoptosis inhibitor 5	Api5	chr3q31	full length	ENSRNOG00000009689	362170	B1WC49	---	---	NP_001120851	NM_001127379	---	---	---	---	---	---	0006916 // anti-apoptosis // inferred from electronic annotation /// 0006916 // anti-apoptosis // not recorded	0005634 // nucleus // inferred from electronic annotation /// 0005634 // nucleus // not recorded /// 0005681 // spliceosomal complex // inferred from electronic annotation /// 0005681 // spliceosomal complex // not recorded	0005488 // binding // inferred from electronic annotation /// 0017134 // fibroblast growth factor binding // inferred from electronic annotation /// 0017134 // fibroblast growth factor binding // not recorded	---
1367492_at	10.8281	10.9032	11.0401	10.9061	10.807	10.7884	10.8539	10.7961	P	P	P	P	P	P	P	P	Rat Expression Array 230 2.0	Rattus norvegicus	2011-06-09	Consensus sequence	GenBank	Rn.8387.1	gb:AI227785 /DB_XREF=gi:3811672 /DB_XREF=EST224480 /CLONE=RBRCL50 /FEA=EST /CNT=16 /TID=Rn.8387.1 /TIER=Stack /STK=14 /UG=Rn.8387 /UG_TITLE=ESTs, Weakly similar to DNAJ PROTEIN HOMOLOG MTJ1 (M.musculus)	AI227785	Rn.8387	Rn.105212	November 2004 (Baylor College of Medicine HGSC Rnor3.4)	chr5:152598028-152598448 (-) // 95.89 // q33.1	DnaJ (Hsp40) homolog, subfamily C, member 8	Dnajc8	chr5q36	full length	---	313035	D3ZJN2 /// D3ZUF2 /// D4A1G6 /// Q642C0	---	---	NP_001013186	NM_001013168	---	---	---	---	---	---	0008380 // RNA splicing // not recorded	---	0031072 // heat shock protein binding // inferred from electronic annotation	---
1367493_at	11.3427	11.3363	11.4754	11.4539	11.5129	11.6103	11.6013	11.5156	P	P	P	P	P	P	P	P	Rat Expression Array 230 2.0	Rattus norvegicus	2011-06-09	Consensus sequence	GenBank	Rn.6986.1	gb:AI599288 /DB_XREF=gi:4608336 /DB_XREF=EST250991 /CLONE=REMEQ42 /FEA=EST /CNT=17 /TID=Rn.6986.1 /TIER=Stack /STK=14 /UG=Rn.6986 /UG_TITLE=ESTs, Moderately similar to I38333 ARD1 N-acetyl transferase homolog (H.sapiens)	AI599288	Rn.6986	Rn.98561	November 2004 (Baylor College of Medicine HGSC Rnor3.4)	chr18:77111431-77112142 (+) // 99.72 // q23	similar to DNA segment, Chr 18, Wayne State University 98, expressed	RGD1560212	chr18q12.3	full length	---	498890	A0JPQ5	---	---	NP_001071144	NM_001077676	---	---	---	---	---	---	0008152 // metabolic process // inferred from electronic annotation	---	0008080 // N-acetyltransferase activity // inferred from electronic annotation	---
1367494_at	11.474	11.5004	11.6084	11.612	11.8526	12.0428	11.9208	11.929	P	P	P	P	P	P	P	P	Rat Expression Array 230 2.0	Rattus norvegicus	2011-06-09	Consensus sequence	GenBank	Rn.1198.1	gb:AW523764 /DB_XREF=gi:7166149 /DB_XREF=UI-R-BO0-aih-h-01-0-UI.s1 /CLONE=UI-R-BO0-aih-h-01-0-UI /FEA=EST /CNT=17 /TID=Rn.1198.1 /TIER=Stack /STK=13 /UG=Rn.1198 /UG_TITLE=ESTs, Highly similar to AF132969 1 CGI-35 protein (H.sapiens)	AW523764	Rn.1198	Rn.1198	November 2004 (Baylor College of Medicine HGSC Rnor3.4)	chr6:109016579-109028439 (+) // 100.0 // q21 /// chr2:191804304-191804970 (-) // 90.82 // q32.2	similar to CGI-35 protein	RGD1310899	chr6q31	full length	ENSRNOG00000004723	299198	Q1RP75	---	---	NP_001037700	NM_001044235	---	---	---	---	---	---	---	---	---	---
1367495_at	11.0512	11.0204	11.0724	11.1735	12.2619	12.2542	12.1914	12.2233	P	P	P	P	P	P	P	P	Rat Expression Array 230 2.0	Rattus norvegicus	2011-06-09	Consensus sequence	GenBank	Rn.7374.1	gb:AI412457 /DB_XREF=gi:4255961 /DB_XREF=EST240756 /CLONE=RBRDO40 /FEA=EST /CNT=18 /TID=Rn.7374.1 /TIER=Stack /STK=13 /UG=Rn.7374 /UG_TITLE=ESTs, Highly similar to prefoldin 4 (Homo sapiens) (H.sapiens)	AI412457	Rn.7374	---	November 2004 (Baylor College of Medicine HGSC Rnor3.4)	chr14:84226144-84227019 (+) // 77.51 // q31.2	prefoldin subunit 4-like	LOC100366237	---	---	---	100366237	---	---	---	XP_002726322	XM_002726276	---	---	---	---	---	---	0006457 // protein folding // inferred from electronic annotation	0016272 // prefoldin complex // inferred from electronic annotation	0051082 // unfolded protein binding // inferred from electronic annotation /// 0051087 // chaperone binding // inferred from electronic annotation	---
1367496_at	12.5138	12.5507	12.6182	12.5991	11.4319	11.4382	11.4196	11.3244	P	P	P	P	P	P	P	P	Rat Expression Array 230 2.0	Rattus norvegicus	2011-06-09	Consensus sequence	GenBank	Rn.11839.1	gb:AI179901 /DB_XREF=gi:3730539 /DB_XREF=EST223632 /CLONE=RSPCN46 /FEA=EST /CNT=20 /TID=Rn.11839.1 /TIER=Stack /STK=12 /UG=Rn.11839 /UG_TITLE=ESTs, Highly similar to T9S2_MOUSE Transmembrane 9 superfamily protein member 2 precursor (M.musculus)	AI179901	Rn.11839	Rn.11839	November 2004 (Baylor College of Medicine HGSC Rnor3.4)	chr15:107277096-107281488 (+) // 97.1 //	transmembrane 9 superfamily member 2	Tm9sf2	chr15q25	full length	ENSRNOG00000012751	306197	D4A873 /// Q66HG5	---	---	NP_001005554	NM_001005554	---	---	---	---	---	---	---	0005768 // endosome // inferred from electronic annotation /// 0010008 // endosome membrane // inferred from electronic annotation /// 0016020 // membrane // inferred from electronic annotation /// 0016021 // integral to membrane // inferred from electronic annotation	---	---
1367497_at	10.8096	10.9933	11.2287	10.9497	10.3835	10.5067	10.4859	10.4061	P	P	P	P	P	P	P	P	Rat Expression Array 230 2.0	Rattus norvegicus	2011-06-09	Consensus sequence	GenBank	Rn.17232.1	gb:AA851302 /DB_XREF=gi:4131923 /DB_XREF=EST194070 /CLONE=RPLAF01 /FEA=EST /CNT=13 /TID=Rn.17232.1 /TIER=Stack /STK=12 /UG=Rn.17232 /UG_TITLE=ESTs	AA851302	Rn.17232	Rn.103732	November 2004 (Baylor College of Medicine HGSC Rnor3.4)	chr7:68061786-68062302 (+) // 93.55 // q11.22	phosphatidylserine synthase 1	Ptdss1	chr7q22	full length	---	314553	Q5PQL5	---	---	NP_001012113	NM_001012113	---	---	---	---	---	---	0006659 // phosphatidylserine biosynthetic process // inferred from electronic annotation	---	---	---
1367498_at	10.853	10.7649	10.91	10.8619	11.1784	11.1828	11.1654	11.0849	P	P	P	P	P	P	P	P	Rat Expression Array 230 2.0	Rattus norvegicus	2011-06-09	Consensus sequence	GenBank	Rn.16949.1	gb:AI177873 /DB_XREF=gi:3728511 /DB_XREF=EST221522 /CLONE=RPLCH69 /FEA=EST /CNT=14 /TID=Rn.16949.1 /TIER=Stack /STK=12 /UG=Rn.16949 /UG_TITLE=ESTs	AI177873	Rn.16949	Rn.16949	November 2004 (Baylor College of Medicine HGSC Rnor3.4)	chr3:170014279-170014870 (-) // 97.2 // q26.2	YTH domain family, member 1	Ythdf1	chr3q43	full length	ENSRNOG00000027015	296467	D3ZKJ3 /// Q4V8J6	---	---	NP_001019927	NM_001024756	---	---	---	---	---	---	---	---	---	---
1367499_at	4.71228	4.9136	5.22219	4.89633	6.6648	7.41997	6.9437	6.87047	P	P	P	P	P	P	P	P	Rat Expression Array 230 2.0	Rattus norvegicus	2011-06-09	Consensus sequence	GenBank	Rn.3950.1	gb:BM390900 /DB_XREF=gi:18190953 /DB_XREF=UI-R-CN1-cjp-i-09-0-UI.s1 /CLONE=UI-R-CN1-cjp-i-09-0-UI /FEA=EST /CNT=16 /TID=Rn.3950.1 /TIER=Stack /STK=11 /UG=Rn.3950 /UG_TITLE=ESTs, Weakly similar to T20120 hypothetical protein C50F4.14 - Caenorhabditis elegans (C.elegans)	BM390900	Rn.3950	Rn.3950	November 2004 (Baylor College of Medicine HGSC Rnor3.4)	chr3:76847865-76848401 (-) // 72.28 // p12.3	solute carrier family 35, member C1	Slc35c1	chr3q24	full length	ENSRNOG00000007732	311204	D3ZWW0	---	---	NP_001101218	NM_001107748	---	---	---	---	---	---	0030259 // lipid glycosylation // not recorded	0016020 // membrane // inferred from electronic annotation /// 0016021 // integral to membrane // inferred from electronic annotation	---	---
1367500_at	12.7768	12.7747	12.7067	12.7945	13.7994	13.8794	13.7841	13.8419	P	P	P	P	P	P	P	P	Rat Expression Array 230 2.0	Rattus norvegicus	2011-06-09	Consensus sequence	GenBank	Rn.8472.1	gb:AI169461 /DB_XREF=gi:3705769 /DB_XREF=EST215314 /CLONE=RKIBS69 /FEA=EST /CNT=16 /TID=Rn.8472.1 /TIER=Stack /STK=11 /UG=Rn.8472 /UG_TITLE=ESTs, Highly similar to DSS1_HUMAN DELETED IN SPLIT HANDSPLIT FOOT PROTEIN 1 (M.musculus)	AI169461	Rn.8472	Rn.8472	November 2004 (Baylor College of Medicine HGSC Rnor3.4)	chr4:31316339-31336191 (-) // 93.33 // p15.1	split hand/foot malformation (ectrodactyly) type 1	Shfm1	chr4q13	full length	ENSRNOG00000010420	680532	D3ZHW9	---	---	NP_001119562	NM_001126090	---	---	---	---	---	---	0000724 // double-strand break repair via homologous recombination // not recorded /// 0006508 // proteolysis // not recorded	0000502 // proteasome complex // not recorded /// 0032039 // integrator complex // not recorded	0005515 // protein binding // not recorded /// 0008233 // peptidase activity // not recorded	---
1367501_at	10.0216	9.99731	10.3953	10.2333	10.097	10.1611	10.1402	10.0053	P	P	P	P	P	P	P	P	Rat Expression Array 230 2.0	Rattus norvegicus	2011-06-09	Consensus sequence	GenBank	Rn.2930.1	gb:BM383845 /DB_XREF=gi:18183898 /DB_XREF=UI-R-DM1-ckc-c-02-0-UI.s1 /CLONE=UI-R-DM1-ckc-c-02-0-UI /FEA=EST /CNT=19 /TID=Rn.2930.1 /TIER=Stack /STK=11 /UG=Rn.2930 /UG_TITLE=ESTs	BM383845	Rn.2930	Rn.2930	November 2004 (Baylor College of Medicine HGSC Rnor3.4)	chr1:75123379-75124461 (+) // 96.39 // p31.1 /// chr14:33463123-33464203 (-) // 99.91 // q13.1 /// chr1:75190189-75191271 (-) // 96.2 // p31.1	signal recognition particle 72	Srp72	chr14p11	full length	ENSRNOG00000002100	498351	B0BND9 /// D4A7R0 /// Q32PZ7	---	---	NP_001164072 /// XP_001066751 /// XP_001074215	NM_001170601 /// XM_001066751 /// XM_001074215	---	---	---	---	---	---	0006614 // SRP-dependent cotranslational protein targeting to membrane // inferred from electronic annotation /// 0042493 // response to drug // not recorded	0005786 // signal recognition particle, endoplasmic reticulum targeting // not recorded /// 0048500 // signal recognition particle // inferred from electronic annotation	0005047 // signal recognition particle binding // not recorded /// 0005488 // binding // inferred from electronic annotation /// 0008312 // 7S RNA binding // inferred from electronic annotation	---
1367502_at	10.2033	10.0345	9.96885	10.0756	10.4787	10.4317	10.4602	10.4156	P	P	P	P	P	P	P	P	Rat Expression Array 230 2.0	Rattus norvegicus	2011-06-09	Consensus sequence	GenBank	Rn.22778.1	gb:BI287857 /DB_XREF=gi:14943881 /DB_XREF=UI-R-CW0s-ccm-a-10-0-UI.s1 /CLONE=UI-R-CW0s-ccm-a-10-0-UI /FEA=EST /CNT=19 /TID=Rn.22778.1 /TIER=Stack /STK=11 /UG=Rn.22778 /UG_TITLE=ESTs, Weakly similar to F43C1.3.p (Caenorhabditis elegans) (C.elegans)	BI287857	Rn.22778	Rn.22778	November 2004 (Baylor College of Medicine HGSC Rnor3.4)	chr1:205815480-205823814 (+) // 89.45 // q32.1	mitochondrial ribosomal protein L21	Mrpl21	chr1q42	full length	ENSRNOG00000013845	309140	D3ZDC6 /// D3ZMR9	---	---	NP_001101037	NM_001107567	---	---	---	---	---	---	0006412 // translation // inferred from electronic annotation	0005622 // intracellular // inferred from electronic annotation /// 0005739 // mitochondrion // not recorded /// 0005840 // ribosome // inferred from electronic annotation	0003723 // RNA binding // inferred from electronic annotation /// 0003735 // structural constituent of ribosome // inferred from electronic annotation	---
1367503_at	11.2183	11.2999	11.5178	11.3841	11.0605	11.0781	11.1183	11.0944	P	P	P	P	P	P	P	P	Rat Expression Array 230 2.0	Rattus norvegicus	2011-06-09	Consensus sequence	GenBank	Rn.3358.1	gb:AI409930 /DB_XREF=gi:4253434 /DB_XREF=EST238223 /CLONE=RPLDN79 /FEA=EST /CNT=15 /TID=Rn.3358.1 /TIER=Stack /STK=11 /UG=Rn.3358 /UG_TITLE=ESTs, Highly similar to S71116 BCR-associated protein BAP31 - mouse (M.musculus)	AI409930	Rn.3358	Rn.96419	November 2004 (Baylor College of Medicine HGSC Rnor3.4)	chrX:159583687-159587466 (-) // 97.58 //	B-cell receptor-associated protein 31	Bcap31	chrXq37	full length	ENSRNOG00000019053	293852	Q6AY58	---	---	NP_001004224	NM_001004224	---	---	---	---	---	---	0006886 // intracellular protein transport // inferred from electronic annotation /// 0006955 // immune response // inferred from electronic annotation /// 0006955 // immune response // not recorded /// 0007283 // spermatogenesis // inferred from electronic annotation /// 0007283 // spermatogenesis // not recorded	0000139 // Golgi membrane // inferred from electronic annotation /// 0000139 // Golgi membrane // not recorded /// 0005783 // endoplasmic reticulum // inferred from electronic annotation /// 0005783 // endoplasmic reticulum // not recorded /// 0005789 // endoplasmic reticulum membrane // not recorded /// 0005829 // cytosol // not recorded /// 0005886 // plasma membrane // inferred from electronic…	0004872 // receptor activity // inferred from electronic annotation /// 0005515 // protein binding // inferred from electronic annotation /// 0005515 // protein binding // not recorded	---
1367504_at	9.24588	9.54114	9.73656	9.47991	9.6696	9.79313	9.85085	9.8467	P	P	P	P	P	P	P	P	Rat Expression Array 230 2.0	Rattus norvegicus	2011-06-09	Consensus sequence	GenBank	Rn.16597.1	gb:AI411286 /DB_XREF=gi:4254790 /DB_XREF=EST239580 /CLONE=RKIEO63 /FEA=EST /CNT=12 /TID=Rn.16597.1 /TIER=Stack /STK=11 /UG=Rn.16597 /UG_TITLE=ESTs	AI411286	Rn.16597	Rn.199095	November 2004 (Baylor College of Medicine HGSC Rnor3.4)	chr7:9664355-9664764 (+) // 95.56 // p21.3	---	---	---	est	---	---	---	---	---	---	---	---	---	---	---	---	---	---	---	---	---
1367505_at	9.68216	9.57005	9.57429	9.69523	9.0235	8.92371	8.92872	8.93565	P	P	P	P	P	P	P	P	Rat Expression Array 230 2.0	Rattus norvegicus	2011-06-09	Consensus sequence	GenBank	Rn.8773.1	gb:AW916491 /DB_XREF=gi:8082218 /DB_XREF=EST347795 /CLONE=RGIDQ86 /FEA=EST /CNT=17 /TID=Rn.8773.1 /TIER=Stack /STK=10 /UG=Rn.8773 /UG_TITLE=ESTs	AW916491	Rn.8773	Rn.8773	November 2004 (Baylor College of Medicine HGSC Rnor3.4)	chr14:3719871-3720715 (+) // 100.0 // p12	zinc finger protein 644	Znf644	chr14p22	full length	ENSRNOG00000002112	305127	D4A778	---	---	NP_001132956	NM_001139484	---	---	---	---	---	---	---	0005622 // intracellular // inferred from electronic annotation	0003676 // nucleic acid binding // inferred from electronic annotation /// 0008270 // zinc ion binding // inferred from electronic annotation	---
1367506_at	10.1143	10.2161	10.4451	10.1846	11.0013	11.1071	11.0333	11.1839	P	P	P	P	P	P	P	P	Rat Expression Array 230 2.0	Rattus norvegicus	2011-06-09	Consensus sequence	GenBank	Rn.3762.1	gb:BF283488 /DB_XREF=gi:11214558 /DB_XREF=EST448079 /CLONE=RGIED08 /FEA=EST /CNT=15 /TID=Rn.3762.1 /TIER=Stack /STK=10 /UG=Rn.3762 /UG_TITLE=ESTs, Weakly similar to Ribosomal protein L11 (Caenorhabditis elegans) (C.elegans)	BF283488	Rn.3762	Rn.3762	November 2004 (Baylor College of Medicine HGSC Rnor3.4)	chr1:207580222-207583065 (+) // 100.0 // q32.2	mitochondrial ribosomal protein L11	mrpl11	chr1q43	full length	ENSRNOG00000019970	293666	D3ZEB7 /// Q5XIE3	---	---	NP_001006974	NM_001006973	---	---	---	---	---	---	0006412 // translation // inferred from electronic annotation	0005739 // mitochondrion // inferred from electronic annotation /// 0005739 // mitochondrion // not recorded /// 0005762 // mitochondrial large ribosomal subunit // inferred from electronic annotation /// 0005762 // mitochondrial large ribosomal subunit // not recorded /// 0005840 // ribosome // inferred from electronic annotation /// 0030529 // ribonucleoprotein complex // inferred from electron…	0003735 // structural constituent of ribosome // inferred from electronic annotation	---
1367507_at	3.60761	3.43086	3.57394	3.46271	6.36661	6.28473	5.7062	5.90221	P	P	P	P	P	P	P	P	Rat Expression Array 230 2.0	Rattus norvegicus	2011-06-09	Consensus sequence	GenBank	Rn.1934.1	gb:BI281661 /DB_XREF=gi:14931620 /DB_XREF=UI-R-CT0s-cav-a-04-0-UI.s1 /CLONE=UI-R-CT0s-cav-a-04-0-UI /FEA=EST /CNT=13 /TID=Rn.1934.1 /TIER=Stack /STK=10 /UG=Rn.1934 /UG_TITLE=ESTs	BI281661	Rn.1934	Rn.1934	November 2004 (Baylor College of Medicine HGSC Rnor3.4)	chr1:209666126-209669237 (-) // 100.0 // q32.2	nudix (nucleoside diphosphate linked moiety X)-type motif 22	Nudt22	chr1q43	full length	ENSRNOG00000021158	293703	Q6P9U1	---	---	NP_954521	NM_199090	---	---	---	---	---	---	---	---	---	---
1367508_at	9.46695	9.38056	9.25813	9.4317	10.2778	10.309	10.3933	10.2726	P	P	P	P	P	P	P	P	Rat Expression Array 230 2.0	Rattus norvegicus	2011-06-09	Consensus sequence	GenBank	Rn.20990.1	gb:BI281225 /DB_XREF=gi:14930744 /DB_XREF=UI-R-CT0s-cat-h-02-0-UI.s1 /CLONE=UI-R-CT0s-cat-h-02-0-UI /FEA=EST /CNT=10 /TID=Rn.20990.1 /TIER=Stack /STK=10 /UG=Rn.20990 /UG_TITLE=ESTs	BI281225	Rn.20990	Rn.20990	November 2004 (Baylor College of Medicine HGSC Rnor3.4)	chr10:14430312-14430958 (+) // 100.0 // p13	RGD1565784	RGD1565784	chr10q12	full length	ENSRNOG00000029415	497874	D4ACY1	---	---	NP_001102498	NM_001109028	---	---	---	---	---	---	---	---	---	---
1367509_at	11.5456	11.5771	11.6845	11.6451	11.3831	11.5709	11.5174	11.4764	P	P	P	P	P	P	P	P	Rat Expression Array 230 2.0	Rattus norvegicus	2011-06-09	Consensus sequence	GenBank	Rn.2376.1	gb:AI231812 /DB_XREF=gi:3815692 /DB_XREF=EST228500 /CLONE=RHECO58 /FEA=EST /CNT=31 /TID=Rn.2376.1 /TIER=Stack /STK=9 /UG=Rn.2376 /UG_TITLE=ESTs	AI231812	Rn.2376	Rn.25310	November 2004 (Baylor College of Medicine HGSC Rnor3.4)	chr1:40858920-40864765 (+) // 84.9 // p34.2	general transcription factor IIH, polypeptide 5	Gtf2h5	chr1q11	full length	ENSRNOG00000018007	502227	D3ZEI7	---	---	NP_001119560	NM_001126088	---	---	---	---	---	---	0006289 // nucleotide-excision repair // inferred from electronic annotation	---	0003677 // DNA binding // inferred from electronic annotation	---
1367510_at	10.648	10.6122	10.7763	10.7316	10.9824	11.1305	11.0278	10.9389	P	P	P	P	P	P	P	P	Rat Expression Array 230 2.0	Rattus norvegicus	2011-06-09	Consensus sequence	GenBank	Rn.4142.1	gb:BG381690 /DB_XREF=gi:13306162 /DB_XREF=UI-R-CT0-bue-c-07-0-UI.s1 /CLONE=UI-R-CT0-bue-c-07-0-UI /FEA=EST /CNT=19 /TID=Rn.4142.1 /TIER=Stack /STK=9 /UG=Rn.4142 /UG_TITLE=ESTs	BG381690	Rn.4142	Rn.4142	November 2004 (Baylor College of Medicine HGSC Rnor3.4)	chr17:14938293-14938914 (-) // 99.84 // p12	thioredoxin domain containing 15	Txndc15	chr17p14	full length	ENSRNOG00000000133	307180	Q5BJT4 /// Q5BJT5	---	---	NP_001020169	NM_001024998	---	---	---	---	---	---	0006259 // DNA metabolic process // inferred from electronic annotation /// 0045454 // cell redox homeostasis // inferred from electronic annotation	0016020 // membrane // inferred from electronic annotation /// 0016021 // integral to membrane // inferred from electronic annotation	0003677 // DNA binding // inferred from electronic annotation /// 0004518 // nuclease activity // inferred from electronic annotation /// 0005515 // protein binding // inferred from electronic annotation	---
1367511_at	9.34092	9.24808	9.30619	9.14479	7.86553	8.16213	8.27273	8.17641	P	P	P	P	P	P	P	P	Rat Expression Array 230 2.0	Rattus norvegicus	2011-06-09	Consensus sequence	GenBank	Rn.1442.1	gb:BI285459 /DB_XREF=gi:14939118 /DB_XREF=UI-R-DD0-caa-d-05-0-UI.s1 /CLONE=UI-R-DD0-caa-d-05-0-UI /FEA=EST /CNT=17 /TID=Rn.1442.1 /TIER=Stack /STK=9 /UG=Rn.1442 /UG_TITLE=ESTs, Highly similar to NICA_MOUSE NICASTRIN PRECURSOR (M.musculus)	BI285459	Rn.1442	Rn.51975	November 2004 (Baylor College of Medicine HGSC Rnor3.4)	chr13:88060483-88061955 (-) // 96.47 // q31.2	nicastrin	Ncstn	chr13q24	full length	ENSRNOG00000005355	289231	B3DM90 /// Q8CGU6	---	---	NP_777353	NM_174864	---	---	---	---	---	---	0006509 // membrane protein ectodomain proteolysis // not recorded /// 0006509 // membrane protein ectodomain proteolysis // inferred from sequence or structural similarity /// 0006915 // apoptosis // not recorded /// 0007219 // Notch signaling pathway // inferred from electronic annotation /// 0008624 // induction of apoptosis by extracellular signals // not recorded /// 0016485 // protein proce…	0005624 // membrane fraction // inferred from electronic annotation /// 0005624 // membrane fraction // not recorded /// 0005765 // lysosomal membrane // inferred from direct assay /// 0005783 // endoplasmic reticulum // not recorded /// 0005783 // endoplasmic reticulum // inferred from sequence or structural similarity /// 0005783 // endoplasmic reticulum // inferred from electronic annotation /…	0005515 // protein binding // inferred from physical interaction /// 0005515 // protein binding // not recorded /// 0005515 // protein binding // inferred from electronic annotation /// 0008233 // peptidase activity // inferred from direct assay	---
1367512_at	12.239	12.3399	12.2779	12.3268	12.0141	12.0952	12.0627	12.0518	P	P	P	P	P	P	P	P	Rat Expression Array 230 2.0	Rattus norvegicus	2011-06-09	Consensus sequence	GenBank	Rn.9339.1	gb:AA998435 /DB_XREF=gi:4289839 /DB_XREF=UI-R-C0-ib-e-07-0-UI.s1 /CLONE=UI-R-C0-ib-e-07-0-UI /FEA=EST /CNT=18 /TID=Rn.9339.1 /TIER=Stack /STK=9 /UG=Rn.9339 /UG_TITLE=ESTs, Weakly similar to T31875 hypothetical protein F41E6.9 - Caenorhabditis elegans (C.elegans)	AA998435	Rn.9339	Rn.9339	November 2004 (Baylor College of Medicine HGSC Rnor3.4)	chr5:58347195-58359748 (+) // 90.46 // q11.2	chromatin modifying protein 5	Chmp5	chr5q22	full length	ENSRNOG00000008672	297995	Q4QQV8	---	---	NP_001020581	NM_001025410	---	---	---	---	---	---	0001919 // regulation of receptor recycling // not recorded /// 0006810 // transport // inferred from electronic annotation /// 0007040 // lysosome organization // not recorded /// 0008333 // endosome to lysosome transport // not recorded /// 0015031 // protein transport // inferred from electronic annotation	0005634 // nucleus // not recorded /// 0005737 // cytoplasm // inferred from electronic annotation /// 0005768 // endosome // inferred from electronic annotation /// 0005829 // cytosol // inferred from electronic annotation /// 0010008 // endosome membrane // inferred from electronic annotation /// 0016020 // membrane // inferred from electronic annotation	0005515 // protein binding // not recorded	---
1367513_at	8.44913	8.51795	8.88051	8.45551	8.79581	8.94596	9.04767	9.14363	P	P	P	P	P	P	P	P	Rat Expression Array 230 2.0	Rattus norvegicus	2011-06-09	Consensus sequence	GenBank	Rn.11598.1	gb:BI284935 /DB_XREF=gi:14938076 /DB_XREF=UI-R-DB0-byu-c-01-0-UI.s1 /CLONE=UI-R-DB0-byu-c-01-0-UI /FEA=EST /CNT=14 /TID=Rn.11598.1 /TIER=Stack /STK=9 /UG=Rn.11598 /UG_TITLE=ESTs, Weakly similar to T9S2_MOUSE Transmembrane 9 superfamily protein member 2 precursor (M.musculus)	BI284935	Rn.11598	Rn.98601	November 2004 (Baylor College of Medicine HGSC Rnor3.4)	chr3:143558103-143558912 (+) // 97.28 // q24	Transmembrane 9 superfamily protein member 4	Tm9sf4	chr3q41	full length	---	296279	Q4KLL4	---	---	NP_001020820	NM_001025649	---	---	---	---	---	---	---	0016020 // membrane // inferred from electronic annotation /// 0016021 // integral to membrane // inferred from electronic annotation	---	---
1367514_at	8.88787	8.85377	8.90086	8.77052	6.48064	6.78307	6.56385	6.39832	P	P	P	P	P	P	P	P	Rat Expression Array 230 2.0	Rattus norvegicus	2011-06-09	Consensus sequence	GenBank	Rn.6279.1	gb:AI235508 /DB_XREF=gi:3829014 /DB_XREF=EST232070 /CLONE=ROVCS82 /FEA=EST /CNT=12 /TID=Rn.6279.1 /TIER=Stack /STK=9 /UG=Rn.6279 /UG_TITLE=ESTs	AI235508	Rn.6279	Rn.6279	November 2004 (Baylor College of Medicine HGSC Rnor3.4)	chr1:177047495-177069397 (+) // 100.0 // q25.2	similar to RIKEN cDNA 9030624J02	LOC361635	chr1q35	full length	ENSRNOG00000016063	361635	D3ZEY1 /// D3ZKC4 /// Q5XI83	---	---	NP_001017463	NM_001017463	---	---	---	---	---	---	---	0016020 // membrane // inferred from electronic annotation /// 0016021 // integral to membrane // inferred from electronic annotation	---	---
1367515_at	10.428	10.265	10.439	10.3677	11.067	10.7479	10.8529	11.0868	P	P	P	P	P	P	P	P	Rat Expression Array 230 2.0	Rattus norvegicus	2011-06-09	Consensus sequence	GenBank	Rn.6565.1	gb:BE111850 /DB_XREF=gi:8503955 /DB_XREF=UI-R-BJ1-avz-e-04-0-UI.s1 /CLONE=UI-R-BJ1-avz-e-04-0-UI /FEA=EST /CNT=19 /TID=Rn.6565.1 /TIER=Stack /STK=9 /UG=Rn.6565 /UG_TITLE=ESTs, Highly similar to CAF1 MOUSE CCR4-ASSOCIATED FACTOR 1 (M.musculus)	BE111850	Rn.6565	Rn.101873	November 2004 (Baylor College of Medicine HGSC Rnor3.4)	chr16:55136146-55137736 (+) // 99.81 // q12.2	CCR4-NOT transcription complex, subunit 7	Cnot7	chr16q12.1	full length	ENSRNOG00000012263	306492	B3DMA5 /// D3ZE83	---	---	NP_001100783	NM_001107313	---	---	---	---	---	---	0045944 // positive regulation of transcription from RNA polymerase II promoter // not recorded /// 0045944 // positive regulation of transcription from RNA polymerase II promoter // inferred from electronic annotation	0005634 // nucleus // inferred from direct assay /// 0005634 // nucleus // inferred from electronic annotation /// 0005634 // nucleus // not recorded /// 0030014 // CCR4-NOT complex // not recorded /// 0030014 // CCR4-NOT complex // inferred from electronic annotation	0003676 // nucleic acid binding // inferred from electronic annotation /// 0005515 // protein binding // inferred from physical interaction /// 0005515 // protein binding // not recorded /// 0005515 // protein binding // inferred from electronic annotation /// 0016563 // transcription activator activity // not recorded /// 0016563 // transcription activator activity // inferred from electronic an…	---
1367516_at	8.4419	8.42786	8.2615	8.5747	9.83297	10.0969	10.0331	9.90424	P	P	P	P	P	P	P	P	Rat Expression Array 230 2.0	Rattus norvegicus	2011-06-09	Consensus sequence	GenBank	Rn.12523.1	gb:BG375549 /DB_XREF=gi:13300021 /DB_XREF=UI-R-CV1-btc-f-01-0-UI.s1 /CLONE=UI-R-CV1-btc-f-01-0-UI /FEA=EST /CNT=10 /TID=Rn.12523.1 /TIER=Stack /STK=9 /UG=Rn.12523 /UG_TITLE=ESTs	BG375549	Rn.12523	Rn.187290	November 2004 (Baylor College of Medicine HGSC Rnor3.4)	---	distrobrevin binding protein 1	Dtnbp1	---	full length	---	641528	Q5M834 /// Q6GX91	---	---	NP_001032753	NM_001037664	---	---	---	---	---	---	0031175 // neuron projection development // inferred from sequence or structural similarity /// 0031532 // actin cytoskeleton reorganization // inferred from sequence or structural similarity /// 0048812 // neuron projection morphogenesis // inferred from sequence or structural similarity /// 0060159 // regulation of dopamine receptor signaling pathway // inferred from direct assay	0005634 // nucleus // inferred from electronic annotation /// 0005737 // cytoplasm // inferred from electronic annotation /// 0005768 // endosome // inferred from electronic annotation /// 0005783 // endoplasmic reticulum // inferred from electronic annotation /// 0005789 // endoplasmic reticulum membrane // inferred from sequence or structural similarity /// 0005886 // plasma membrane // inferre…	0005515 // protein binding // inferred from physical interaction /// 0005515 // protein binding // inferred from electronic annotation	---
1367517_at	6.4837	6.83556	7.0448	6.62985	3.85788	3.87398	3.79269	3.77871	P	P	P	P	P	P	P	P	Rat Expression Array 230 2.0	Rattus norvegicus	2011-06-09	Consensus sequence	GenBank	Rn.4203.1	gb:BG373057 /DB_XREF=gi:13269594 /DB_XREF=UI-R-CV1-bsf-a-06-0-UI.s1 /CLONE=UI-R-CV1-bsf-a-06-0-UI /FEA=EST /CNT=9 /TID=Rn.4203.1 /TIER=Stack /STK=9 /UG=Rn.4203 /UG_TITLE=ESTs	BG373057	Rn.4203	Rn.4203	November 2004 (Baylor College of Medicine HGSC Rnor3.4)	chr15:44169885-44170394 (+) // 100.0 // q15.3	---	---	---	est	---	---	---	---	---	---	---	---	---	---	---	---	---	---	---	---	---
1367518_at	10.2712	10.3105	10.3524	10.3674	9.32897	9.48393	9.45442	9.34169	P	P	P	P	P	P	P	P	Rat Expression Array 230 2.0	Rattus norvegicus	2011-06-09	Consensus sequence	GenBank	Rn.11858.1	gb:BI274976 /DB_XREF=gi:14886393 /DB_XREF=UI-R-CX0-bwt-c-04-0-UI.s1 /CLONE=UI-R-CX0-bwt-c-04-0-UI /FEA=EST /CNT=17 /TID=Rn.11858.1 /TIER=Stack /STK=8 /UG=Rn.11858 /UG_TITLE=ESTs	BI274976	Rn.11858	Rn.11858	November 2004 (Baylor College of Medicine HGSC Rnor3.4)	chr19:16512942-16513818 (-) // 72.83 // p13.11	fat mass and obesity associated	Fto	chr19p11	full length	ENSRNOG00000011728	291905	B4F7E0 /// Q2A121	---	---	NP_001034802	NM_001039713	---	---	---	---	---	---	0001659 // temperature homeostasis // inferred from electronic annotation /// 0001659 // temperature homeostasis // not recorded /// 0006281 // DNA repair // inferred from electronic annotation /// 0006307 // DNA dealkylation involved in DNA repair // not recorded /// 0006307 // DNA dealkylation involved in DNA repair // inferred from sequence or structural similarity /// 0006307 // DNA dealkylat…	0005634 // nucleus // inferred from electronic annotation /// 0005634 // nucleus // not recorded	0008198 // ferrous iron binding // not recorded /// 0008198 // ferrous iron binding // inferred from sequence or structural similarity /// 0008198 // ferrous iron binding // inferred from electronic annotation /// 0016491 // oxidoreductase activity // inferred from electronic annotation /// 0016702 // oxidoreductase activity, acting on single donors with incorporation of molecular oxygen, incorpo…	---
1367519_at	8.93358	9.12058	9.35131	9.32301	8.57319	8.71874	8.77004	8.72084	P	P	P	P	P	P	P	P	Rat Expression Array 230 2.0	Rattus norvegicus	2011-06-09	Consensus sequence	GenBank	Rn.12390.1	gb:BG373087 /DB_XREF=gi:13269624 /DB_XREF=UI-R-CV1-bsf-d-03-0-UI.s1 /CLONE=UI-R-CV1-bsf-d-03-0-UI /FEA=EST /CNT=16 /TID=Rn.12390.1 /TIER=Stack /STK=8 /UG=Rn.12390 /UG_TITLE=ESTs, Weakly similar to A34581 oxysterol-binding protein (H.sapiens)	BG373087	Rn.12390	Rn.12390	November 2004 (Baylor College of Medicine HGSC Rnor3.4)	chr3:169218714-169219820 (+) // 99.91 // q26.2	oxysterol binding protein-like 2	Osbpl2	chr3q43	full length	ENSRNOG00000007691	296461	Q5BK47	---	---	NP_001013097	NM_001013079	---	---	---	---	---	---	0006810 // transport // inferred from electronic annotation /// 0006869 // lipid transport // inferred from electronic annotation /// 0008202 // steroid metabolic process // inferred from electronic annotation	---	---	---
1367520_at	11.1894	11.2654	11.2386	11.1041	9.92583	10.008	9.97885	9.9936	P	P	P	P	P	P	P	P	Rat Expression Array 230 2.0	Rattus norvegicus	2011-06-09	Consensus sequence	GenBank	Rn.14886.1	gb:AI231050 /DB_XREF=gi:3814930 /DB_XREF=EST227738 /CLONE=REMDE65 /FEA=EST /CNT=16 /TID=Rn.14886.1 /TIER=Stack /STK=8 /UG=Rn.14886 /UG_TITLE=ESTs, Weakly similar to T26528 hypothetical protein Y18D10A.3 - Caenorhabditis elegans (C.elegans)	AI231050	Rn.14886	Rn.14886	November 2004 (Baylor College of Medicine HGSC Rnor3.4)	chr2:180132504-180134509 (-) // 97.54 // q31.2	apolipoprotein A-I binding protein	Apoa1bp	chr2q34	full length	ENSRNOG00000019201	295229	B0BNM1	---	---	NP_001099910	NM_001106440	---	---	---	---	---	---	---	0005576 // extracellular region // inferred from electronic annotation /// 0005576 // extracellular region // not recorded /// 0005739 // mitochondrion // inferred from electronic annotation /// 0005739 // mitochondrion // not recorded	0005515 // protein binding // inferred from electronic annotation /// 0005515 // protein binding // not recorded	---
1367521_at	7.75725	7.55112	7.64052	8.04427	8.48896	8.67362	8.68532	8.49697	P	P	P	P	P	P	P	P	Rat Expression Array 230 2.0	Rattus norvegicus	2011-06-09	Consensus sequence	GenBank	Rn.7260.1	gb:BI281185 /DB_XREF=gi:14930665 /DB_XREF=UI-R-CT0s-cat-d-02-0-UI.s1 /CLONE=UI-R-CT0s-cat-d-02-0-UI /FEA=EST /CNT=10 /TID=Rn.7260.1 /TIER=Stack /STK=8 /UG=Rn.7260 /UG_TITLE=ESTs	BI281185	---	---	November 2004 (Baylor College of Medicine HGSC Rnor3.4)	chr8:61517878-61518636 (+) // 97.06 // q12.1	---	---	---	---	---	---	---	---	---	---	---	---	---	---	---	---	---	---	---	---	---
1367522_at	8.13159	8.12742	8.12966	8.36672	7.77017	7.96958	7.90766	7.99717	P	P	P	P	P	P	P	P	Rat Expression Array 230 2.0	Rattus norvegicus	2011-06-09	Consensus sequence	GenBank	Rn.7795.1	gb:AA894324 /DB_XREF=gi:3021203 /DB_XREF=EST198127 /CLONE=RSPAW65 /FEA=EST /CNT=11 /TID=Rn.7795.1 /TIER=Stack /STK=7 /UG=Rn.7795 /UG_TITLE=ESTs, Highly similar to F8I2 MOUSE FACTOR VIII INTRON 22 PROTEIN (M.musculus)	AA894324	Rn.7795	Rn.41311	November 2004 (Baylor College of Medicine HGSC Rnor3.4)	chrX:159090112-159090953 (+) // 69.38 //	coagulation factor VIII-associated (intronic transcript) 1	F8a1	chrXq37	full length	---	501661	---	---	---	NP_001102793	NM_001109323	---	---	---	---	---	---	---	0005634 // nucleus // not recorded	0005488 // binding // inferred from electronic annotation	---
1367523_at	10.3917	10.4065	10.6719	10.6064	10.0908	10.1275	10.04	10.0507	P	P	P	P	P	P	P	P	Rat Expression Array 230 2.0	Rattus norvegicus	2011-06-09	Consensus sequence	GenBank	Rn.24899.1	gb:AI409145 /DB_XREF=gi:4252649 /DB_XREF=EST237437 /CLONE=ROVEO08 /FEA=EST /CNT=10 /TID=Rn.24899.1 /TIER=Stack /STK=7 /UG=Rn.24899 /UG_TITLE=ESTs, Weakly similar to T29507 hypothetical protein W05H7.3 - Caenorhabditis elegans (C.elegans)	AI409145	Rn.24899	Rn.24899	November 2004 (Baylor College of Medicine HGSC Rnor3.4)	chr19:52890736-52894406 (+) // 97.14 // q13.41 /// chr19:14186535-14187092 (-) // 92.61 // p13.12 /// chrUn:40878529-40879086 (-) // 92.61 //	trafficking protein particle complex 2-like	Trappc2l	chr19q12	full length	ENSRNOG00000014581 /// ENSRNOG00000032666	292074	B2RYU6	---	---	NP_001099663	NM_001106193	---	---	---	---	---	---	0006810 // transport // inferred from electronic annotation /// 0006888 // ER to Golgi vesicle-mediated transport // inferred from electronic annotation /// 0016192 // vesicle-mediated transport // inferred from electronic annotation	0005622 // intracellular // inferred from electronic annotation /// 0005737 // cytoplasm // inferred from electronic annotation /// 0005783 // endoplasmic reticulum // inferred from electronic annotation /// 0005794 // Golgi apparatus // inferred from electronic annotation /// 0048471 // perinuclear region of cytoplasm // inferred from electronic annotation	---	---
1367524_at	5.53025	5.57546	5.58131	5.32569	5.60527	5.77365	5.66206	5.66786	P	P	P	P	P	M	P	P	Rat Expression Array 230 2.0	Rattus norvegicus	2011-06-09	Consensus sequence	GenBank	Rn.12412.1	gb:AW533822 /DB_XREF=gi:7176236 /DB_XREF=UI-R-BU0-anc-e-07-0-UI.s1 /CLONE=UI-R-BU0-anc-e-07-0-UI /FEA=EST /CNT=9 /TID=Rn.12412.1 /TIER=Stack /STK=7 /UG=Rn.12412 /UG_TITLE=ESTs	AW533822	Rn.12412	Rn.22944	November 2004 (Baylor College of Medicine HGSC Rnor3.4)	chr1:137241693-137242181 (+) // 100.0 // q12	zinc finger protein 592	Znf592	chr1q31	full length	ENSRNOG00000011458	293038	D3ZJG8	---	---	NP_001099742	NM_001106272	---	---	---	---	---	---	---	0005622 // intracellular // inferred from electronic annotation	0003676 // nucleic acid binding // inferred from electronic annotation /// 0005515 // protein binding // not recorded /// 0008270 // zinc ion binding // inferred from electronic annotation	---
1367525_at	10.3135	10.5004	10.7245	10.5752	10.9445	10.9598	10.8781	10.8956	P	P	P	P	P	P	P	P	Rat Expression Array 230 2.0	Rattus norvegicus	2011-06-09	Consensus sequence	GenBank	Rn.25107.1	gb:AI179833 /DB_XREF=gi:3730471 /DB_XREF=EST223563 /CLONE=RSPCM53 /FEA=EST /CNT=10 /TID=Rn.25107.1 /TIER=Stack /STK=7 /UG=Rn.25107 /UG_TITLE=ESTs	AI179833	Rn.25107	Rn.25107	November 2004 (Baylor College of Medicine HGSC Rnor3.4)	chr5:145521552-145522367 (-) // 94.35 // q32	thyroid hormone receptor associated protein 3	Thrap3	chr5q36	full length	---	313591	D4A3A4 /// Q5M7V8	---	---	NP_001009693	NM_001009693	---	---	---	---	---	---	0006350 // transcription // inferred from electronic annotation /// 0006367 // transcription initiation from RNA polymerase II promoter // not recorded /// 0030518 // steroid hormone receptor signaling pathway // not recorded /// 0030521 // androgen receptor signaling pathway // not recorded /// 0045449 // regulation of transcription // inferred from electronic annotation /// 0045944 // positive …	0005634 // nucleus // inferred from electronic annotation /// 0005634 // nucleus // not recorded /// 0005730 // nucleolus // not recorded /// 0016592 // mediator complex // not recorded /// 0043231 // intracellular membrane-bounded organelle // not recorded	0000166 // nucleotide binding // inferred from electronic annotation /// 0003712 // transcription cofactor activity // not recorded /// 0003713 // transcription coactivator activity // not recorded /// 0004872 // receptor activity // inferred from electronic annotation /// 0004872 // receptor activity // not recorded /// 0005515 // protein binding // not recorded /// 0005524 // ATP binding // inf…	---
1367526_at	11.2627	11.3263	11.4086	11.3857	11.3413	11.4165	11.3419	11.2018	P	P	P	P	P	P	P	P	Rat Expression Array 230 2.0	Rattus norvegicus	2011-06-09	Consensus sequence	GenBank	Rn.8520.1	gb:AI180224 /DB_XREF=gi:3730862 /DB_XREF=EST223967 /CLONE=RSPCS15 /FEA=EST /CNT=8 /TID=Rn.8520.1 /TIER=Stack /STK=7 /UG=Rn.8520 /UG_TITLE=ESTs	AI180224	Rn.8520	Rn.8520	November 2004 (Baylor College of Medicine HGSC Rnor3.4)	chr3:118182035-118182454 (+) // 96.54 // q13.32	mitochondrial ribosomal protein S26	Mrps26	chr3q36	full length	ENSRNOG00000021224	362216	Q9EPJ3	---	---	NP_001013224	NM_001013206	---	---	---	---	---	---	---	0005739 // mitochondrion // inferred from electronic annotation /// 0005739 // mitochondrion // not recorded /// 0005840 // ribosome // inferred from electronic annotation /// 0030529 // ribonucleoprotein complex // inferred from electronic annotation	---	---
1367527_at	9.14969	9.3437	9.59883	9.29614	11.0121	10.9244	10.9258	10.9603	P	P	P	P	P	P	P	P	Rat Expression Array 230 2.0	Rattus norvegicus	2011-06-09	Consensus sequence	GenBank	Rn.17015.1	gb:AI600258 /DB_XREF=gi:4609306 /DB_XREF=EST251961 /CLONE=REMEQ20 /FEA=EST /CNT=7 /TID=Rn.17015.1 /TIER=Stack /STK=7 /UG=Rn.17015 /UG_TITLE=ESTs	AI600258	Rn.17015	---	November 2004 (Baylor College of Medicine HGSC Rnor3.4)	---	similar to Importin-8 (Imp8) (Ran-binding protein 8) (RanBP8)	LOC686774	---	---	---	686774	---	---	---	---	XR_085827	---	---	---	---	---	---	---	---	---	---
1367528_at	8.25869	8.23948	8.31155	8.53841	8.16612	8.84867	8.28893	8.41474	P	P	P	P	P	P	P	P	Rat Expression Array 230 2.0	Rattus norvegicus	2011-06-09	Consensus sequence	GenBank	Rn.812.1	gb:BE103273 /DB_XREF=gi:8495372 /DB_XREF=UI-R-BX0-aqy-f-06-0-UI.s1 /CLONE=UI-R-BX0-aqy-f-06-0-UI /FEA=EST /CNT=11 /TID=Rn.812.1 /TIER=Stack /STK=6 /UG=Rn.812 /UG_TITLE=ESTs	BE103273	Rn.812	Rn.812	November 2004 (Baylor College of Medicine HGSC Rnor3.4)	chr12:39664233-39664950 (+) // 99.45 // q12	F-box and WD repeat domain containing 8	Fbxw8	chr12q16	full length	---	304522	---	---	---	NP_001100615	NM_001107145	---	---	---	---	---	---	0060712 // spongiotrophoblast layer development // not recorded /// 0060716 // labyrinthine layer blood vessel development // not recorded	0019005 // SCF ubiquitin ligase complex // not recorded	0005515 // protein binding // not recorded	---
1367529_at	9.98732	10.0673	10.0779	9.95134	9.73726	9.79083	9.82796	9.81202	P	P	P	P	P	P	P	P	Rat Expression Array 230 2.0	Rattus norvegicus	2011-06-09	Consensus sequence	GenBank	Rn.1596.1	gb:BE113989 /DB_XREF=gi:8506094 /DB_XREF=UI-R-BJ1-awi-g-06-0-UI.s1 /CLONE=UI-R-BJ1-awi-g-06-0-UI /FEA=EST /CNT=16 /TID=Rn.1596.1 /TIER=Stack /STK=6 /UG=Rn.1596 /UG_TITLE=ESTs	BE113989	Rn.1596	Rn.110990	November 2004 (Baylor College of Medicine HGSC Rnor3.4)	chrUn:65371515-65372784 (+) // 95.19 // /// chrUn:65091114-65474436 (+) // 95.19 // /// chrUn:65357352-65358619 (+) // 94.95 // /// chrUn:65272987-65274256 (+) // 94.4 // /// chr7:94573471-94574737 (-) // 99.84 // q21.3	Der1-like domain family, member 1	Derl1	chr7q32-q33	full length	ENSRNOG00000005551	362912	Q5RKH9	---	---	NP_001014224	NM_001014202	---	---	---	---	---	---	0030433 // ER-associated protein catabolic process // inferred from electronic annotation /// 0030433 // ER-associated protein catabolic process // not recorded /// 0030968 // endoplasmic reticulum unfolded protein response // inferred from electronic annotation /// 0030968 // endoplasmic reticulum unfolded protein response // not recorded /// 0030970 // retrograde protein transport, ER to cytoso…	0005783 // endoplasmic reticulum // inferred from electronic annotation /// 0005783 // endoplasmic reticulum // not recorded /// 0030176 // integral to endoplasmic reticulum membrane // inferred from electronic annotation /// 0030176 // integral to endoplasmic reticulum membrane // not recorded	0005515 // protein binding // inferred from electronic annotation /// 0005515 // protein binding // not recorded /// 0042288 // MHC class I protein binding // inferred from electronic annotation /// 0042288 // MHC class I protein binding // not recorded	---
1367530_at	7.43677	7.25751	7.27626	7.70546	7.68936	7.89253	7.91496	7.54766	P	P	P	P	P	P	P	P	Rat Expression Array 230 2.0	Rattus norvegicus	2011-06-09	Consensus sequence	GenBank	Rn.23890.1	gb:AI412967 /DB_XREF=gi:4256471 /DB_XREF=EST241267 /CLONE=RBRED56 /FEA=EST /CNT=9 /TID=Rn.23890.1 /TIER=Stack /STK=6 /UG=Rn.23890 /UG_TITLE=ESTs	AI412967	Rn.23890	Rn.55471	November 2004 (Baylor College of Medicine HGSC Rnor3.4)	chr3:165022815-165023727 (+) // 97.23 // q26.1	syntaxin 16	Stx16	chr3q42	full length	---	362283	B5DF99 /// D3Z9R7	---	---	NP_001102080	NM_001108610	---	---	---	---	---	---	0006886 // intracellular protein transport // inferred from electronic annotation /// 0016192 // vesicle-mediated transport // inferred from electronic annotation /// 0042147 // retrograde transport, endosome to Golgi // not recorded	0016020 // membrane // inferred from electronic annotation	0005484 // SNAP receptor activity // inferred from electronic annotation /// 0005484 // SNAP receptor activity // not recorded /// 0005515 // protein binding // inferred from electronic annotation	---
1367531_at	11.9409	11.9142	12.1001	12.1188	12.2564	12.2937	12.2653	12.3132	P	P	P	P	P	P	P	P	Rat Expression Array 230 2.0	Rattus norvegicus	2011-06-09	Consensus sequence	GenBank	Rn.2880.1	gb:BG666846 /DB_XREF=gi:13888768 /DB_XREF=DRACNE03 /CLONE=DRACNE03 /FEA=EST /CNT=39 /TID=Rn.2880.1 /TIER=Stack /STK=7 /UG=Rn.2880 /UG_TITLE=ESTs	BG666846	Rn.2880	Rn.79423	November 2004 (Baylor College of Medicine HGSC Rnor3.4)	chr12:23163972-23164982 (+) // 98.44 // p12.1	eukaryotic translation initiation factor 4H	Eif4h	chr12q12	full length	ENSRNOG00000001454	288599	D3ZQF1 /// Q5XI72	---	---	NP_001006958	NM_001006957	---	---	---	---	---	---	0006412 // translation // inferred from electronic annotation	0005737 // cytoplasm // inferred from electronic annotation /// 0005829 // cytosol // not recorded /// 0048471 // perinuclear region of cytoplasm // inferred from electronic annotation	0000166 // nucleotide binding // inferred from electronic annotation /// 0003676 // nucleic acid binding // inferred from electronic annotation /// 0003723 // RNA binding // inferred from electronic annotation /// 0003743 // translation initiation factor activity // inferred from electronic annotation /// 0005515 // protein binding // inferred from electronic annotation /// 0005515 // protein bin…	---
1367532_at	12.5549	12.5285	12.4978	12.6055	12.8353	12.8474	12.8648	12.8916	P	P	P	P	P	P	P	P	Rat Expression Array 230 2.0	Rattus norvegicus	2011-06-09	Consensus sequence	GenBank	Rn.1570.1	gb:AA893186 /DB_XREF=gi:3020065 /DB_XREF=EST196989 /CLONE=RKIBD28 /FEA=EST /CNT=36 /TID=Rn.1570.1 /TIER=Stack /STK=7 /UG=Rn.1570 /UG_TITLE=ESTs	AA893186	Rn.1570	Rn.107901	November 2004 (Baylor College of Medicine HGSC Rnor3.4)	chr7:139366719-139367392 (+) // 100.0 // q34	DAZ associated protein 2	Dazap2	chr7q36	full length	ENSRNOG00000004628	300235	P60486	---	---	NP_001013125	NM_001013107	---	---	---	---	---	---	---	---	0005515 // protein binding // inferred from electronic annotation	---
1367533_at	10.5135	10.5729	10.6743	10.4959	11.1002	11.2184	11.2801	11.2877	P	P	P	P	P	P	P	P	Rat Expression Array 230 2.0	Rattus norvegicus	2011-06-09	Consensus sequence	GenBank	Rn.25007.1	gb:BG663097 /DB_XREF=gi:13885019 /DB_XREF=DRA08C01 /CLONE=DRA08C01 /FEA=EST /CNT=19 /TID=Rn.25007.1 /TIER=Stack /STK=7 /UG=Rn.25007 /UG_TITLE=ESTs	BG663097	Rn.25007	Rn.25007	November 2004 (Baylor College of Medicine HGSC Rnor3.4)	chr18:16404156-16410453 (+) // 95.6 // p11.1	elongation protein 2 homolog (S. cerevisiae)	Elp2	chr18p12	full length	ENSRNOG00000015301	307545	Q496Z0	---	---	NP_001029317	NM_001034145	---	---	---	---	---	---	0006350 // transcription // inferred from electronic annotation /// 0006368 // RNA elongation from RNA polymerase II promoter // inferred from sequence or structural similarity /// 0043248 // proteasome assembly // inferred from sequence or structural similarity /// 0045449 // regulation of transcription // inferred from electronic annotation /// 0046425 // regulation of JAK-STAT cascade // infer…	0000502 // proteasome complex // inferred from sequence or structural similarity /// 0005634 // nucleus // inferred from electronic annotation /// 0005737 // cytoplasm // inferred from electronic annotation /// 0008023 // transcription elongation factor complex // not recorded	0003677 // DNA binding // not recorded /// 0005515 // protein binding // inferred from electronic annotation /// 0005515 // protein binding // not recorded /// 0019901 // protein kinase binding // inferred from electronic annotation /// 0019901 // protein kinase binding // not recorded /// 0061133 // endopeptidase activator activity // inferred from sequence or structural similarity	---
1367534_at	9.56759	9.63104	8.9358	8.75481	7.40279	8.17745	7.84812	7.84765	P	P	P	P	P	P	P	P	Rat Expression Array 230 2.0	Rattus norvegicus	2011-06-09	Consensus sequence	GenBank	Rn.17952.1	gb:BG374688 /DB_XREF=gi:13299160 /DB_XREF=UI-R-CV1-bsq-c-06-0-UI.s1 /CLONE=UI-R-CV1-bsq-c-06-0-UI /FEA=EST /CNT=11 /TID=Rn.17952.1 /TIER=Stack /STK=6 /UG=Rn.17952 /UG_TITLE=ESTs	BG374688	Rn.17952	Rn.14944	November 2004 (Baylor College of Medicine HGSC Rnor3.4)	chr3:17321948-17322481 (+) // 78.4 // p24.3	RAB GTPase activating protein 1	Rabgap1	chr3q11	full length	ENSRNOG00000009402	311911	D3ZX42	---	---	NP_001101311	NM_001107841	---	---	---	---	---	---	0032313 // regulation of Rab GTPase activity // inferred from electronic annotation	0005622 // intracellular // inferred from electronic annotation	0004872 // receptor activity // inferred from electronic annotation /// 0005097 // Rab GTPase activator activity // inferred from electronic annotation	---
1367535_at	5.19107	5.68655	5.92643	5.3023	5.52346	5.79263	5.71758	5.75379	P	P	P	P	P	P	P	P	Rat Expression Array 230 2.0	Rattus norvegicus	2011-06-09	Consensus sequence	GenBank	Rn.9129.1	gb:BG373523 /DB_XREF=gi:13270060 /DB_XREF=UI-R-CS0-bsd-g-08-0-UI.s1 /CLONE=UI-R-CS0-bsd-g-08-0-UI /FEA=EST /CNT=7 /TID=Rn.9129.1 /TIER=ConsEnd /STK=5 /UG=Rn.9129 /UG_TITLE=ESTs, Highly similar to T12543 hypothetical protein DKFZp434M154.1 (H.sapiens)	BG373523	Rn.9129	Rn.9129	November 2004 (Baylor College of Medicine HGSC Rnor3.4)	chr1:78360138-78360707 (+) // 100.0 // p31.1	interferon regulatory factor 2 binding protein 1	Irf2bp1	chr1q21	full length	ENSRNOG00000014252	308404	D4AAZ8	---	---	NP_001100953	NM_001107483	---	---	---	---	---	---	---	---	---	---
1367536_at	6.47183	6.34896	6.06916	6.52198	8.80989	8.70463	8.59927	8.7405	P	P	P	P	P	P	P	P	Rat Expression Array 230 2.0	Rattus norvegicus	2011-06-09	Consensus sequence	GenBank	Rn.15452.1	gb:AI172106 /DB_XREF=gi:3712146 /DB_XREF=EST218101 /CLONE=RMUBV02 /FEA=EST /CNT=6 /TID=Rn.15452.1 /TIER=ConsEnd /STK=5 /UG=Rn.15452 /UG_TITLE=ESTs, Weakly similar to ZC373.5.p (Caenorhabditis elegans) (C.elegans)	AI172106	Rn.15452	Rn.15452	November 2004 (Baylor College of Medicine HGSC Rnor3.4)	chr3:88328909-88332798 (+) // 100.0 // p11.1	APAF1 interacting protein	Apip	chr3q32	full length	ENSRNOG00000007446	295961	D3ZUI1	EC:4.2.1.109	---	NP_001099962	NM_001106492	---	---	---	---	---	---	0043066 // negative regulation of apoptosis // not recorded /// 0071267 // L-methionine salvage // inferred from electronic annotation	0005737 // cytoplasm // inferred from electronic annotation	0005515 // protein binding // not recorded /// 0042802 // identical protein binding // not recorded /// 0043167 // ion binding // inferred from electronic annotation /// 0046872 // metal ion binding // inferred from electronic annotation	---
1367537_at	9.98952	10.0392	9.845	9.87999	11.2823	11.2654	11.2996	11.2925	P	P	P	P	P	P	P	P	Rat Expression Array 230 2.0	Rattus norvegicus	2011-06-09	Consensus sequence	GenBank	Rn.13285.1	gb:AI012479 /DB_XREF=gi:3226311 /DB_XREF=EST206930 /CLONE=RPLAX74 /FEA=EST /CNT=12 /TID=Rn.13285.1 /TIER=ConsEnd /STK=4 /UG=Rn.13285 /UG_TITLE=ESTs	AI012479	Rn.13285	Rn.105097	November 2004 (Baylor College of Medicine HGSC Rnor3.4)	chr14:83848843-83850816 (+) // 99.41 // q31.2	eukaryotic translation initiation factor 4E nuclear import factor 1	Eif4enif1	chr14q21	full length	ENSRNOG00000018475	305468	D3Z864 /// D3ZMF2 /// D4ACF1	---	---	NP_001100700	NM_001107230	---	---	---	---	---	---	---	0005634 // nucleus // not recorded /// 0005737 // cytoplasm // not recorded /// 0005829 // cytosol // not recorded /// 0043231 // intracellular membrane-bounded organelle // not recorded	0005515 // protein binding // not recorded	---
1367538_at	10.0864	10.1442	10.055	10.1063	8.63866	8.60221	8.64504	8.46103	P	P	P	P	P	P	P	P	Rat Expression Array 230 2.0	Rattus norvegicus	2011-06-09	Consensus sequence	GenBank	Rn.23398.1	gb:BF284303 /DB_XREF=gi:11215373 /DB_XREF=EST448894 /CLONE=RGIEO12 /FEA=EST /CNT=8 /TID=Rn.23398.1 /TIER=ConsEnd /STK=4 /UG=Rn.23398 /UG_TITLE=ESTs	BF284303	---	---	November 2004 (Baylor College of Medicine HGSC Rnor3.4)	---	---	---	---	---	---	---	---	---	---	---	---	---	---	---	---	---	---	---	---	---	---
1367539_at	10.3537	10.3398	10.3951	10.4303	10.3138	10.2234	10.2679	10.3216	P	P	P	P	P	P	P	P	Rat Expression Array 230 2.0	Rattus norvegicus	2011-06-09	Consensus sequence	GenBank	Rn.24468.1	gb:AI170357 /DB_XREF=gi:4134494 /DB_XREF=EST216283 /CLONE=RLUCH32 /FEA=EST /CNT=9 /TID=Rn.24468.1 /TIER=ConsEnd /STK=4 /UG=Rn.24468 /UG_TITLE=ESTs	AI170357	---	---	November 2004 (Baylor College of Medicine HGSC Rnor3.4)	chr6:115177107-115178095 (-) // 99.1 // q22.1	---	---	---	---	---	---	---	---	---	---	---	---	---	---	---	---	---	---	---	---	---
1367540_at	7.01987	7.27481	6.93495	6.98928	6.47837	6.54437	6.73013	6.70711	P	P	P	P	P	P	P	P	Rat Expression Array 230 2.0	Rattus norvegicus	2011-06-09	Consensus sequence	GenBank	Rn.16048.1	gb:AI044872 /DB_XREF=gi:3291691 /DB_XREF=UI-R-C1-kd-f-09-0-UI.s1 /CLONE=UI-R-C1-kd-f-09-0-UI /FEA=EST /CNT=5 /TID=Rn.16048.1 /TIER=ConsEnd /STK=4 /UG=Rn.16048 /UG_TITLE=ESTs	AI044872	Rn.16048	Rn.16048	November 2004 (Baylor College of Medicine HGSC Rnor3.4)	chr6:101999869-102000212 (-) // 100.0 // q16.3	zinc finger, FYVE domain containing 26	Zfyve26	chr6q24	full length	ENSRNOG00000028111	314265	D3ZB97 /// D3ZBA4 /// D4A8G9	---	---	NP_001101508	NM_001108038	---	---	---	---	---	---	---	---	0008270 // zinc ion binding // inferred from electronic annotation /// 0046872 // metal ion binding // inferred from electronic annotation	---
1367541_at	10.0644	9.90881	10.0305	10.0726	11.0698	10.8929	11.0232	11.0892	P	P	P	P	P	P	P	P	Rat Expression Array 230 2.0	Rattus norvegicus	2011-06-09	Consensus sequence	GenBank	Rn.40464.1	gb:BE113965 /DB_XREF=gi:8506070 /DB_XREF=UI-R-BJ1-awi-e-04-0-UI.s1 /CLONE=UI-R-BJ1-awi-e-04-0-UI /FEA=EST /CNT=7 /TID=Rn.40464.1 /TIER=ConsEnd /STK=3 /UG=Rn.40464 /UG_TITLE=ESTs, Weakly similar to methylase (Caenorhabditis elegans) (C.elegans)	BE113965	Rn.40464	Rn.117034	November 2004 (Baylor College of Medicine HGSC Rnor3.4)	chr3:52010300-52022434 (-) // 99.89 // p21.2	methyltransferase like 5	Mettl5	chr3q21	full length	ENSRNOG00000008469	502632	B0BNB3	---	---	NP_001107653	NM_001114181	---	---	---	---	---	---	0032259 // methylation // inferred from electronic annotation	---	0003676 // nucleic acid binding // inferred from electronic annotation /// 0008168 // methyltransferase activity // inferred from electronic annotation	---
1367542_at	9.58255	9.75613	10.1078	9.90051	10.1119	10.0257	10.0175	9.88925	P	P	P	P	P	P	P	P	Rat Expression Array 230 2.0	Rattus norvegicus	2011-06-09	Consensus sequence	GenBank	Rn.15048.1	gb:AI411793 /DB_XREF=gi:4255297 /DB_XREF=EST240087 /CLONE=RKIDN11 /FEA=EST /CNT=11 /TID=Rn.15048.1 /TIER=ConsEnd /STK=2 /UG=Rn.15048 /UG_TITLE=ESTs, Weakly similar to T47146 hypothetical protein DKFZp761C169.1 (H.sapiens)	AI411793	Rn.15048	Rn.6789	November 2004 (Baylor College of Medicine HGSC Rnor3.4)	chr14:103254635-103255604 (+) // 95.64 // q32.32 /// chr2:230990098-230991065 (+) // 97.87 // q36.3 /// chr5:136875154-136877225 (+) // 95.44 // q31.2 /// chrX:94070612-94071575 (+) // 96.65 // q21.33 /// chr20:44511797-44512759 (-) // 97.46 // q13.12 /// chr10:24651514-24652477 (-) // 96.96 // p12.1	GC-rich promoter binding protein 1-like 1 /// vasculin-like protein 1-like	Gpbp1l1 /// LOC100364632	chr5q36	full length	ENSRNOG00000037595	100364632 /// 313519	Q3KR53	---	---	NP_001030085 /// XP_002725062	NM_001034913 /// XM_002725016	---	---	---	---	---	---	0006350 // transcription // inferred from electronic annotation /// 0045449 // regulation of transcription // inferred from electronic annotation	0005634 // nucleus // inferred from electronic annotation	0003677 // DNA binding // inferred from electronic annotation	---
1367543_at	10.3765	10.2696	10.1168	10.2331	10.1138	10.2596	10.1416	10.2204	P	P	P	P	P	P	P	P	Rat Expression Array 230 2.0	Rattus norvegicus	2011-06-09	Consensus sequence	GenBank	Rn.22767.1	gb:BG377443 /DB_XREF=gi:13301915 /DB_XREF=UI-R-CU0-buy-f-06-0-UI.s1 /CLONE=UI-R-CU0-buy-f-06-0-UI /FEA=EST /CNT=12 /TID=Rn.22767.1 /TIER=ConsEnd /STK=2 /UG=Rn.22767 /UG_TITLE=ESTs, Weakly similar to YJA4_YEAST HYPOTHETICAL 23.7 KD PROTEIN IN CYR1-OST1 INTERGENIC REGION (S.cerevisiae)	BG377443	Rn.22767	Rn.31818	November 2004 (Baylor College of Medicine HGSC Rnor3.4)	chr3:155482618-155486078 (+) // 98.65 // q25.31	similar to Protein SYS1 homolog	LOC685079	chr3q42	---	---	685079	---	---	---	XP_001062200 /// XP_002726339	XM_001062200 /// XM_002726293	---	---	---	---	---	---	---	---	---	---
1367544_at	9.87287	9.80439	10.1003	9.82196	9.52471	9.44662	9.5201	9.32721	P	P	P	P	P	P	P	P	Rat Expression Array 230 2.0	Rattus norvegicus	2011-06-09	Consensus sequence	GenBank	Rn.6743.1	gb:BE120556 /DB_XREF=gi:8512661 /DB_XREF=UI-R-CA0-bat-h-02-0-UI.s1 /CLONE=UI-R-CA0-bat-h-02-0-UI /FEA=EST /CNT=2 /TID=Rn.6743.1 /TIER=ConsEnd /STK=2 /UG=Rn.6743 /UG_TITLE=ESTs	BE120556	Rn.6743	Rn.82537	November 2004 (Baylor College of Medicine HGSC Rnor3.4)	chr8:74909353-74909879 (-) // 100.0 // q21.11	ring finger protein 111	Rnf111	chr8q24	full length	ENSRNOG00000012842	300813	D4A9T1	EC:6.3.2.-	---	NP_001100306	NM_001106836	---	---	---	---	---	---	0007389 // pattern specification process // not recorded /// 0045941 // positive regulation of transcription // not recorded	0005634 // nucleus // not recorded	0004842 // ubiquitin-protein ligase activity // not recorded /// 0005515 // protein binding // inferred from electronic annotation /// 0005515 // protein binding // not recorded /// 0008270 // zinc ion binding // inferred from electronic annotation /// 0046332 // SMAD binding // inferred from physical interaction /// 0046872 // metal ion binding // inferred from electronic annotation	---
1367545_at	9.37506	9.30323	9.65726	9.53127	7.88056	7.82002	7.77176	7.46189	P	P	P	P	P	P	P	P	Rat Expression Array 230 2.0	Rattus norvegicus	2011-06-09	Consensus sequence	GenBank	Rn.14944.1	gb:AI710043 /DB_XREF=gi:4999819 /DB_XREF=UI-R-C3-tm-g-11-0-UI.s1 /CLONE=UI-R-C3-tm-g-11-0-UI /FEA=EST /CNT=3 /TID=Rn.14944.1 /TIER=ConsEnd /STK=1 /UG=Rn.14944 /UG_TITLE=ESTs	AI710043	Rn.14944	Rn.14944	November 2004 (Baylor College of Medicine HGSC Rnor3.4)	chr3:17322498-17322916 (+) // 99.76 // p24.3	RAB GTPase activating protein 1	Rabgap1	chr3q11	full length	ENSRNOG00000009402	311911	D3ZX42	---	---	NP_001101311	NM_001107841	---	---	---	---	---	---	0032313 // regulation of Rab GTPase activity // inferred from electronic annotation	0005622 // intracellular // inferred from electronic annotation	0004872 // receptor activity // inferred from electronic annotation /// 0005097 // Rab GTPase activator activity // inferred from electronic annotation	---
1367546_at	12.0249	11.9978	11.9598	11.8844	12.0882	12.0672	12.019	11.9327	P	P	P	P	P	P	P	P	Rat Expression Array 230 2.0	Rattus norvegicus	2011-06-09	Consensus sequence	GenBank	Rn.12639.1	gb:BM390298 /DB_XREF=gi:18190351 /DB_XREF=UI-R-CN1-cjq-e-14-0-UI.s1 /CLONE=UI-R-CN1-cjq-e-14-0-UI /FEA=EST /CNT=9 /TID=Rn.12639.1 /TIER=ConsEnd /STK=0 /UG=Rn.12639 /UG_TITLE=ESTs, Weakly similar to T19441 hypothetical protein C25A1.13 - Caenorhabditis elegans (C.elegans)	BM390298	Rn.12639	Rn.126526	November 2004 (Baylor College of Medicine HGSC Rnor3.4)	chr1:250070579-250072969 (-) // 74.14 //	mitochondrial ribosomal protein L43	Mrpl43	chr1q54	full length	ENSRNOG00000014890	309440	D3ZXF8	---	---	NP_001101068	NM_001107598	---	---	---	---	---	---	---	0005739 // mitochondrion // not recorded /// 0005762 // mitochondrial large ribosomal subunit // not recorded	0005515 // protein binding // not recorded	---
1367547_at	10.0352	9.99729	9.98327	10.2702	9.3993	9.47458	9.48105	9.36247	P	P	P	P	P	P	P	P	Rat Expression Array 230 2.0	Rattus norvegicus	2011-06-09	Consensus sequence	GenBank	Rn.22885.1	gb:BM388010 /DB_XREF=gi:18188063 /DB_XREF=UI-R-CN1-cjl-e-11-0-UI.s1 /CLONE=UI-R-CN1-cjl-e-11-0-UI /FEA=EST /CNT=5 /TID=Rn.22885.1 /TIER=ConsEnd /STK=0 /UG=Rn.22885 /UG_TITLE=ESTs, Highly similar to Z198_MOUSE Zinc finger protein 198 (Fragment) (M.musculus)	BM388010	Rn.22885	Rn.22885	November 2004 (Baylor College of Medicine HGSC Rnor3.4)	chr15:35977632-35978027 (+) // 95.18 // q14	zinc finger, MYM-type 2	Zmym2	chr15p12	---	ENSRNOG00000008734	305913	D4A3R6	---	---	XP_001060431 /// XP_224241	XM_001060431 /// XM_224241	---	---	---	---	---	---	---	0016605 // PML body // not recorded	0005515 // protein binding // not recorded /// 0008270 // zinc ion binding // inferred from electronic annotation /// 0031624 // ubiquitin conjugating enzyme binding // not recorded	---
1367548_at	6.8551	6.66919	6.89851	7.08744	7.99447	8.40529	8.06453	7.84808	P	P	P	P	P	P	P	P	Rat Expression Array 230 2.0	Rattus norvegicus	2011-06-09	Consensus sequence	GenBank	Rn.20390.1	gb:BE118462 /DB_XREF=gi:8510567 /DB_XREF=UI-R-BJ1-azp-h-05-0-UI.s1 /CLONE=UI-R-BJ1-azp-h-05-0-UI /FEA=EST /CNT=3 /TID=Rn.20390.1 /TIER=ConsEnd /STK=0 /UG=Rn.20390 /UG_TITLE=ESTs	BE118462	Rn.20390	Rn.98280	November 2004 (Baylor College of Medicine HGSC Rnor3.4)	chr12:40689501-40689868 (+) // 95.08 // q12	suppressor of defective silencing 3 homolog (S. cerevisiae)	Suds3	chr12q16	---	---	360819	---	---	---	XP_001080131 /// XP_341093	XM_001080131 /// XM_341092	---	---	---	---	---	---	0016481 // negative regulation of transcription // not recorded	0016580 // Sin3 complex // not recorded	0005515 // protein binding // not recorded /// 0042802 // identical protein binding // not recorded /// 0042826 // histone deacetylase binding // not recorded	---
1367549_a_at	12.3296	12.3467	12.4671	12.4286	12.0943	12.1114	12.1511	12.0745	P	P	P	P	P	P	P	P	Rat Expression Array 230 2.0	Rattus norvegicus	2011-06-09	Consensus sequence	GenBank	Rn.8074.1	gb:BI282757 /DB_XREF=gi:14933842 /DB_XREF=UI-R-CW0s-cce-h-01-0-UI.s1 /CLONE=UI-R-CW0s-cce-h-01-0-UI /FEA=EST /CNT=23 /TID=Rn.8074.1 /TIER=Stack /STK=18 /UG=Rn.8074 /UG_TITLE=ESTs, Highly similar to adaptor-related protein complex AP-3, delta subunit (Mus musculus) (M.musculus)	BI282757	Rn.8074	Rn.8074	November 2004 (Baylor College of Medicine HGSC Rnor3.4)	chr7:10515420-10516163 (+) // 99.73 // p21.3	adaptor-related protein complex 3, delta 1 subunit	Ap3d1	chr7q11	full length	ENSRNOG00000018977	314633	B5DFK6 /// Q4FZT4 /// Q5RK16	---	---	NP_001094189	NM_001100719	---	---	---	---	---	---	0006886 // intracellular protein transport // not recorded /// 0006886 // intracellular protein transport // inferred from electronic annotation /// 0015031 // protein transport // inferred from electronic annotation /// 0016192 // vesicle-mediated transport // inferred from electronic annotation /// 0019882 // antigen processing and presentation // not recorded /// 0019882 // antigen processing …	0005794 // Golgi apparatus // inferred from electronic annotation /// 0030117 // membrane coat // inferred from electronic annotation	0005488 // binding // inferred from electronic annotation /// 0005515 // protein binding // inferred from electronic annotation /// 0008565 // protein transporter activity // inferred from electronic annotation	---
1367550_a_at	10.6077	10.5438	10.584	10.5742	10.2237	9.99978	10.0698	10.1452	P	P	P	P	P	P	P	P	Rat Expression Array 230 2.0	Rattus norvegicus	2011-06-09	Consensus sequence	GenBank	Rn.18949.1	gb:BI287742 /DB_XREF=gi:14943665 /DB_XREF=UI-R-CS0s-cbi-d-08-0-UI.s1 /CLONE=UI-R-CS0s-cbi-d-08-0-UI /FEA=EST /CNT=13 /TID=Rn.18949.1 /TIER=ConsEnd /STK=4 /UG=Rn.18949 /UG_TITLE=ESTs, Weakly similar to T28787 hypothetical protein C41D11.5 - Caenorhabditis elegans (C.elegans)	BI287742	Rn.18949	Rn.198278	November 2004 (Baylor College of Medicine HGSC Rnor3.4)	chr5:118765584-118795552 (-) // 98.02 // q23.1	TM2 domain containing 1	Tm2d1	chr5q33	full length	ENSRNOG00000007527	362545	D3ZYF8	---	---	NP_001102140	NM_001108670	---	---	---	---	---	---	0007165 // signal transduction // not recorded /// 0007186 // G-protein coupled receptor protein signaling pathway // not recorded /// 0008624 // induction of apoptosis by extracellular signals // not recorded	0005887 // integral to plasma membrane // not recorded	0001540 // beta-amyloid binding // not recorded /// 0004930 // G-protein coupled receptor activity // not recorded	---
1367551_a_at	10.9043	10.8707	10.9242	10.928	11.1653	11.146	11.2294	11.0821	P	P	P	P	P	P	P	P	Rat Expression Array 230 2.0	Rattus norvegicus	2011-06-09	Consensus sequence	GenBank	Rn.19273.1	gb:AI406693 /DB_XREF=gi:4250197 /DB_XREF=EST234980 /CLONE=ROVDV60 /FEA=EST /CNT=3 /TID=Rn.19273.1 /TIER=ConsEnd /STK=3 /UG=Rn.19273 /UG_TITLE=ESTs, Highly similar to T08806 hypothetical protein DKFZp586I1023.1 (H.sapiens)	AI406693	Rn.19273	Rn.137253	November 2004 (Baylor College of Medicine HGSC Rnor3.4)	chr12:10950576-10953934 (+) // 98.53 // p13.2	similar to CG14980-PB	RGD1306410	chr12p11	full length	ENSRNOG00000001032	360768	A1EC78 /// Q6AYE1 /// Q6AYE3	---	---	NP_001014148	NM_001014126	---	---	---	---	---	---	0006350 // transcription // inferred from electronic annotation /// 0043966 // histone H3 acetylation // inferred from electronic annotation /// 0045449 // regulation of transcription // inferred from electronic annotation	0000125 // PCAF complex // inferred from electronic annotation /// 0005634 // nucleus // inferred from electronic annotation	0003677 // DNA binding // inferred from electronic annotation /// 0004402 // histone acetyltransferase activity // inferred from electronic annotation /// 0008270 // zinc ion binding // inferred from electronic annotation	---
1367552_at	2.6724	2.83166	2.58464	2.81539	3.05319	3.0019	3.06424	2.89045	A	M	A	A	A	A	A	A	Rat Expression Array 230 2.0	Rattus norvegicus	2011-06-09	Consensus sequence	GenBank	Rn.9942.1	gb:M25590.1 /DB_XREF=gi:202756 /FEA=FLmRNA /CNT=455 /TID=Rn.9942.1 /TIER=FL+Stack /STK=452 /UG=Rn.9942 /LL=24802 /UG_GENE=Svp4 /UG_TITLE=Seminal vesicle protein 4 /DEF=Rat androgen-dependent protein mRNA, complete cds. /FL=gb:NM_012662.1 gb:M25590.1	M25590	Rn.9942	Rn.9942	November 2004 (Baylor College of Medicine HGSC Rnor3.4)	chr3:155212243-155214749 (+) // 93.09 // q25.31	seminal vesicle secretory protein 4	Svs4	chr3q42	full length	ENSRNOG00000013796	24802	P02783	---	---	NP_036794	NM_012662	---	---	---	---	---	---	---	0005576 // extracellular region // inferred from electronic annotation /// 0005615 // extracellular space // inferred from electronic annotation	---	---
1367553_x_at	2.39634	2.68048	2.92631	2.71118	2.78127	2.92964	3.12784	2.87584	A	A	A	A	A	A	A	A	Rat Expression Array 230 2.0	Rattus norvegicus	2011-06-09	Consensus sequence	GenBank	Rn.36966.1	gb:NM_033234.1 /DB_XREF=gi:17985948 /GEN=Hbb /FEA=FLmRNA /CNT=369 /TID=Rn.36966.1 /TIER=FL+Stack /STK=329 /UG=Rn.36966 /LL=24440 /DEF=Rattus norvegicus Hemoglobin, beta (Hbb), mRNA. /PROD=hemoglobin, beta /FL=gb:M17084.1 gb:NM_033234.1	NM_033234	Rn.36966	Rn.202945	November 2004 (Baylor College of Medicine HGSC Rnor3.4)	chr1:161584855-161620196 (-) // 90.7 // q23.3 /// chr1:161578238-161579551 (-) // 77.18 // q23.3	hemoglobin, beta	Hbb	chr1q22	full length	ENSRNOG00000033465	24440	P02091	---	---	NP_150237	NM_033234	---	---	---	---	---	---	0006749 // glutathione metabolic process // inferred from direct assay /// 0006810 // transport // inferred from electronic annotation /// 0015671 // oxygen transport // inferred from direct assay /// 0015671 // oxygen transport // inferred from electronic annotation /// 0051291 // protein heterooligomerization // inferred from direct assay	0005833 // hemoglobin complex // inferred from direct assay /// 0005833 // hemoglobin complex // inferred from electronic annotation	0005344 // oxygen transporter activity // inferred from electronic annotation /// 0005506 // iron ion binding // inferred from electronic annotation /// 0005515 // protein binding // not recorded /// 0019825 // oxygen binding // inferred from direct assay /// 0019825 // oxygen binding // inferred from electronic annotation /// 0019825 // oxygen binding // not recorded /// 0020037 // heme binding …	---
1367554_at	2.48877	2.49944	2.44374	2.50593	2.68059	2.51446	2.45191	2.6241	A	A	A	A	A	A	A	A	Rat Expression Array 230 2.0	Rattus norvegicus	2011-06-09	Consensus sequence	GenBank	Rn.9763.1	gb:NM_080770.1 /DB_XREF=gi:18158438 /GEN=Psbp1 /FEA=FLmRNA /CNT=292 /TID=Rn.9763.1 /TIER=FL+Stack /STK=284 /UG=Rn.9763 /DEF=Rattus norvegicus Prostatic steroid-binding protein 1 (Psbp1), mRNA. /PROD=prostatic steroid-binding protein 1 /FL=gb:NM_080770.1	NM_080770	Rn.9763	Rn.103180	November 2004 (Baylor College of Medicine HGSC Rnor3.4)	chr1:212297712-212300507 (+) // 97.69 // q32.3 /// chr1:212162297-212165110 (+) // 95.2 // q32.3	secretoglobin, family 2A, member 1 /// secretoglobin, family 2A, member 2	Scgb2a1 /// Scgb2a2	chr1q43	full length	ENSRNOG00000020305	25010 /// 361725	P02780 /// Q9JHB9	---	---	NP_542948 /// NP_976078	NM_080770 /// NM_203333	---	---	---	---	---	---	0051262 // protein tetramerization // traceable author statement	0005576 // extracellular region // inferred from electronic annotation /// 0005615 // extracellular space // traceable author statement	0005488 // binding // inferred from electronic annotation /// 0005496 // steroid binding // inferred from electronic annotation /// 0008289 // lipid binding // inferred from electronic annotation	---
1367555_at	2.06573	2.09637	2.12087	2.08807	2.00643	2.01574	2.19525	2.13739	A	M	A	M	A	A	M	A	Rat Expression Array 230 2.0	Rattus norvegicus	2011-06-09	Consensus sequence	GenBank	Rn.34353.1	gb:NM_134326.1 /DB_XREF=gi:19705430 /GEN=Alb /FEA=FLmRNA /CNT=264 /TID=Rn.34353.1 /TIER=FL+Stack /STK=225 /UG=Rn.34353 /LL=24186 /DEF=Rattus norvegicus Albumin (Alb), mRNA. /PROD=albumin /FL=gb:NM_134326.1	NM_134326	Rn.34353	Rn.202968	November 2004 (Baylor College of Medicine HGSC Rnor3.4)	chr14:19126931-19142220 (-) // 98.04 // q11.2	albumin	Alb	chr14p22	full length	ENSRNOG00000002911	24186	P02770	EC:6.1.1.16	---	NP_599153	NM_134326	---	---	---	---	0	---	0006810 // transport // inferred from electronic annotation /// 0006950 // response to stress // inferred from direct assay /// 0007584 // response to nutrient // inferred from expression pattern /// 0009267 // cellular response to starvation // not recorded /// 0009267 // cellular response to starvation // inferred from sequence or structural similarity /// 0010033 // response to organic substan…	0005576 // extracellular region // inferred from electronic annotation /// 0005576 // extracellular region // not recorded /// 0005604 // basement membrane // inferred from direct assay /// 0005615 // extracellular space // inferred from direct assay /// 0005615 // extracellular space // not recorded /// 0005615 // extracellular space // inferred from electronic annotation /// 0005737 // cytoplas…	0003677 // DNA binding // not recorded /// 0003677 // DNA binding // inferred from sequence or structural similarity /// 0005504 // fatty acid binding // inferred from direct assay /// 0005504 // fatty acid binding // not recorded /// 0005504 // fatty acid binding // inferred from sequence or structural similarity /// 0005515 // protein binding // not recorded /// 0008144 // drug binding // infer…	---
1367556_s_at	2.33766	2.32079	2.25113	2.24189	2.37104	2.31321	2.34229	2.07889	A	A	A	A	A	A	A	A	Rat Expression Array 230 2.0	Rattus norvegicus	2011-06-09	Consensus sequence	GenBank	Rn.34353.1	gb:NM_134326.1 /DB_XREF=gi:19705430 /GEN=Alb /FEA=FLmRNA /CNT=264 /TID=Rn.34353.1 /TIER=FL+Stack /STK=225 /UG=Rn.34353 /LL=24186 /DEF=Rattus norvegicus Albumin (Alb), mRNA. /PROD=albumin /FL=gb:NM_134326.1	NM_134326	Rn.34353	Rn.202968	November 2004 (Baylor College of Medicine HGSC Rnor3.4)	chr14:19126931-19142220 (-) // 98.04 // q11.2	albumin	Alb	chr14p22	full length	ENSRNOG00000002911	24186	P02770 /// P04041	EC:6.1.1.16	---	NP_599153	NM_134326	---	---	---	---	0	---	0006749 // glutathione metabolic process // inferred from direct assay /// 0006810 // transport // inferred from electronic annotation /// 0006950 // response to stress // inferred from direct assay /// 0006979 // response to oxidative stress // inferred from electronic annotation /// 0006979 // response to oxidative stress // traceable author statement /// 0006982 // response to lipid hydroperox…	0005576 // extracellular region // inferred from electronic annotation /// 0005576 // extracellular region // not recorded /// 0005604 // basement membrane // inferred from direct assay /// 0005615 // extracellular space // inferred from direct assay /// 0005615 // extracellular space // not recorded /// 0005615 // extracellular space // inferred from electronic annotation /// 0005625 // soluble …	0003677 // DNA binding // not recorded /// 0003677 // DNA binding // inferred from sequence or structural similarity /// 0004601 // peroxidase activity // inferred from electronic annotation /// 0004602 // glutathione peroxidase activity // inferred from direct assay /// 0004602 // glutathione peroxidase activity // inferred from electronic annotation /// 0005504 // fatty acid binding // inferred…	Oxidative_Stress // GenMAPP
1367557_s_at	13.7514	13.6652	13.6789	13.7972	13.9818	14.2967	14.0522	14.1311	P	P	P	P	P	P	P	P	Rat Expression Array 230 2.0	Rattus norvegicus	2011-06-09	Consensus sequence	GenBank	Rn.54911.1	gb:NM_017008.1 /DB_XREF=gi:8393417 /GEN=Gapd /FEA=FLmRNA /CNT=230 /TID=Rn.54911.1 /TIER=FL+Stack /STK=188 /UG=Rn.54911 /LL=24383 /DEF=Rattus norvegicus Glyceraldehyde-3-phosphate dehydrogenase (Gapd), mRNA. /PROD=glyceraldehyde-3-phosphate dehydrogenase /FL=gb:NM_017008.1 gb:AF106860.2 gb:M17701.1 gb:AB017801.1	NM_017008	Rn.54911	Rn.129558	November 2004 (Baylor College of Medicine HGSC Rnor3.4)	chr14:385012-386267 (+) // 57.66 // p13 /// chr16:25751134-25752412 (+) // 60.81 // p12.1 /// chr18:64974972-64976241 (+) // 58.66 // q22.1 /// chr3:127117885-127119160 (+) // 58.14 // q21.3 /// chr5:117080215-117081491 (+) // 60.72 // q23.1 /// chr5:57051680-57061296 (+) // 58.38 // q11.2 /// chr8:44321663-44322934 (+) // 59.9 // p11.1 /// chr9:62710172-62710953 (+) // 37.28 // q12 /// chr11:706…	glyceraldehyde-3-phosphate dehydrogenase	Gapdh	chr4q42	full length	ENSRNOG00000004407 /// ENSRNOG00000018630 /// ENSRNOG00000020449 /// ENSRNOG00000030963 /// ENSRNOG00000033057 /// ENSRNOG00000038610	24383	C8CHS7 /// D3ZGY4 /// D3ZX39 /// P04797 /// P97617 /// Q0QEU1 /// Q8K4T7 /// Q8K4T8	EC:1.2.1.12	---	NP_058704	NM_017008	---	---	---	---	---	---	0005975 // carbohydrate metabolic process // inferred from direct assay /// 0006006 // glucose metabolic process // inferred from electronic annotation /// 0006094 // gluconeogenesis // inferred from direct assay /// 0006096 // glycolysis // inferred from direct assay /// 0006096 // glycolysis // inferred from electronic annotation /// 0006915 // apoptosis // inferred from mutant phenotype /// 00…	0005625 // soluble fraction // inferred from direct assay /// 0005634 // nucleus // inferred from direct assay /// 0005737 // cytoplasm // not recorded /// 0005737 // cytoplasm // inferred from electronic annotation /// 0005739 // mitochondrion // not recorded /// 0005829 // cytosol // inferred from direct assay	0003824 // catalytic activity // inferred from electronic annotation /// 0004365 // glyceraldehyde-3-phosphate dehydrogenase (phosphorylating) activity // inferred from direct assay /// 0004365 // glyceraldehyde-3-phosphate dehydrogenase (phosphorylating) activity // inferred from electronic annotation /// 0004365 // glyceraldehyde-3-phosphate dehydrogenase (phosphorylating) activity // not recor…	Glycolysis_and_Gluconeogenesis // GenMAPP
1367558_x_at	2.01885	1.99943	1.9075	2.10672	2.06089	2.25716	2.10375	2.10893	A	A	A	A	A	A	A	A	Rat Expression Array 230 2.0	Rattus norvegicus	2011-06-09	Consensus sequence	GenBank	Rn.9977.1	gb:NM_012718.1 /DB_XREF=gi:7549741 /GEN=Andpro /FEA=FLmRNA /CNT=191 /TID=Rn.9977.1 /TIER=FL+Stack /STK=185 /UG=Rn.9977 /LL=25030 /DEF=Rattus norvegicus Androgen regulated 20 kDa protein (Andpro), mRNA. /PROD=androgen regulated 20 kDa protein /FL=gb:NM_012718.1 gb:M58167.1 gb:M27901.1	NM_012718	Rn.9977	Rn.9977	November 2004 (Baylor College of Medicine HGSC Rnor3.4)	chr3:138085490-138092024 (-) // 99.3 // q22.3 /// chr3:137858839-138336762 (-) // 91.76 // q22.3	androgen regulated 20 kDa protein	Andpro	chr3q41	full length	ENSRNOG00000031840	25030	P22282	---	---	NP_036850	NM_012718	---	---	---	---	---	---	0030521 // androgen receptor signaling pathway // inferred from mutant phenotype	0005634 // nucleus // inferred from direct assay /// 0005829 // cytosol // inferred from direct assay	0004869 // cysteine-type endopeptidase inhibitor activity // inferred from electronic annotation /// 0030414 // peptidase inhibitor activity // inferred from electronic annotation	---
1367559_at	13.5246	13.5016	13.5752	13.5853	13.2199	13.3904	13.2532	13.353	P	P	P	P	P	P	P	P	Rat Expression Array 230 2.0	Rattus norvegicus	2011-06-09	Consensus sequence	GenBank	Rn.1905.1	gb:L01122.1 /DB_XREF=gi:204122 /FEA=FLmRNA /CNT=223 /TID=Rn.1905.1 /TIER=FL+Stack /STK=178 /UG=Rn.1905 /LL=29292 /UG_GENE=Ftl1 /DEF=Rattus norvegicus (clone J13) ferritin light chain subunit mRNA, complete cds. /PROD=ferritin light chain /FL=gb:L01122.1 gb:NM_022500.1	L01122	Rn.1905	Rn.1905	November 2004 (Baylor College of Medicine HGSC Rnor3.4)	chr10:45777564-45778466 (+) // 92.46 // q11.21 /// chr13:86732203-86733125 (+) // 97.13 // q31.1 /// chr15:36823698-36824602 (+) // 90.23 // q14 /// chr2:149806723-149807754 (+) // 89.28 // q23.1 /// chr7:13799151-13800063 (+) // 95.22 // p21.3 /// chr5:152845952-152846877 (+) // 95.97 // q33.2 /// chr1:169029690-169030613 (-) // 96.6 // q24.2 /// chr1:95929244-95931084 (-) // 96.39 // p21.3 /// …	ferritin, light polypeptide	Ftl	chr1q22	full length	ENSRNOG00000020843 /// ENSRNOG00000031506 /// ENSRNOG00000031540 /// ENSRNOG00000039298	29292	D4A8D3 /// P02793 /// P97622	---	---	NP_071945	NM_022500	---	---	---	---	---	---	0006826 // iron ion transport // inferred from electronic annotation /// 0006879 // cellular iron ion homeostasis // traceable author statement /// 0006879 // cellular iron ion homeostasis // inferred from electronic annotation /// 0006892 // post-Golgi vesicle-mediated transport // not recorded /// 0016044 // cellular membrane organization // not recorded /// 0055114 // oxidation reduction // in…	0005829 // cytosol // not recorded	0005488 // binding // inferred from electronic annotation /// 0005515 // protein binding // not recorded /// 0008199 // ferric iron binding // inferred from electronic annotation /// 0016491 // oxidoreductase activity // inferred from electronic annotation /// 0042802 // identical protein binding // not recorded /// 0046872 // metal ion binding // inferred from electronic annotation /// 0046914 /…	---
1367560_at	14.6703	14.6809	14.528	14.7996	14.0355	14.3115	14.0426	14.1261	P	P	P	P	P	P	P	P	Rat Expression Array 230 2.0	Rattus norvegicus	2011-06-09	Consensus sequence	GenBank	Rn.1079.1	gb:NM_022402.1 /DB_XREF=gi:11693175 /GEN=Arbp /FEA=FLmRNA /CNT=214 /TID=Rn.1079.1 /TIER=FL+Stack /STK=142 /UG=Rn.1079 /LL=64205 /DEF=Rattus norvegicus acidic ribosomal protein P0 (Arbp), mRNA. /PROD=acidic ribosomal protein P0 /FL=gb:NM_022402.1	NM_022402	Rn.1079	Rn.1079	November 2004 (Baylor College of Medicine HGSC Rnor3.4)	chr12:42315579-42319032 (-) // 88.72 // q12	ribosomal protein, large, P0	Rplp0	chr12q16	full length	ENSRNOG00000001148	64205	P19945	---	---	NP_071797	NM_022402	---	---	---	---	---	---	0006414 // translational elongation // inferred from electronic annotation /// 0006414 // translational elongation // not recorded /// 0042254 // ribosome biogenesis // inferred from electronic annotation	0005622 // intracellular // inferred from electronic annotation /// 0005737 // cytoplasm // inferred from electronic annotation /// 0005829 // cytosol // not recorded /// 0005840 // ribosome // inferred from electronic annotation /// 0030529 // ribonucleoprotein complex // not recorded /// 0030529 // ribonucleoprotein complex // inferred from sequence or structural similarity /// 0030529 // ribon…	0003735 // structural constituent of ribosome // inferred from electronic annotation /// 0005515 // protein binding // not recorded	Ribosomal_Proteins // GenMAPP
1367561_at	14.4652	14.4988	14.4038	14.5189	14.1082	14.2089	14.0396	14.064	P	P	P	P	P	P	P	P	Rat Expression Array 230 2.0	Rattus norvegicus	2011-06-09	Consensus sequence	GenBank	Rn.1254.1	gb:NM_022514.1 /DB_XREF=gi:11968093 /GEN=Rpl27 /FEA=FLmRNA /CNT=157 /TID=Rn.1254.1 /TIER=FL+Stack /STK=135 /UG=Rn.1254 /LL=64306 /DEF=Rattus norvegicus ribosomal protein L27 (Rpl27), mRNA. /PROD=ribosomal protein L27 /FL=gb:NM_022514.1	NM_022514	Rn.1254	Rn.1254	November 2004 (Baylor College of Medicine HGSC Rnor3.4)	chr10:90469761-90473512 (+) // 96.43 // q23.31 /// chr11:18332382-18332900 (-) // 89.66 // p15.1	ribosomal protein L27	Rpl27	chr10q32.1	full length	ENSRNOG00000020674	64306	P61354	---	---	NP_071959	NM_022514	---	---	---	---	---	---	0006412 // translation // inferred from electronic annotation /// 0006414 // translational elongation // not recorded	0005622 // intracellular // inferred from electronic annotation /// 0005829 // cytosol // not recorded /// 0005840 // ribosome // inferred from electronic annotation /// 0030529 // ribonucleoprotein complex // not recorded /// 0030529 // ribonucleoprotein complex // inferred from electronic annotation	0003735 // structural constituent of ribosome // inferred from electronic annotation	---
1367562_at	12.2168	12.1469	12.3949	12.2371	4.03156	4.1352	4.33834	4.17276	P	P	P	P	M	A	P	P	Rat Expression Array 230 2.0	Rattus norvegicus	2011-06-09	Consensus sequence	GenBank	Rn.31991.1	gb:NM_012656.1 /DB_XREF=gi:6981573 /GEN=Sparc /FEA=FLmRNA /CNT=304 /TID=Rn.31991.1 /TIER=FL+Stack /STK=123 /UG=Rn.31991 /LL=24791 /DEF=Rattus norvegicus Secreted acidic cystein-rich glycoprotein (osteonectin) (Sparc), mRNA. /PROD=secreted acidic cystein-rich glycoprotein(osteonectin) /FL=gb:D28875.1 gb:NM_012656.1	NM_012656	Rn.31991	Rn.98989	November 2004 (Baylor College of Medicine HGSC Rnor3.4)	chr10:40809734-40822017 (-) // 89.84 // q11.1	secreted protein, acidic, cysteine-rich (osteonectin)	Sparc	chr10q22	full length	ENSRNOG00000012840	24791	D3ZYI8 /// P16975	---	---	NP_036788	NM_012656	---	---	---	---	---	---	0001503 // ossification // inferred from expression pattern /// 0007165 // signal transduction // inferred from electronic annotation /// 0007507 // heart development // inferred from expression pattern /// 0009629 // response to gravity // inferred from expression pattern /// 0010288 // response to lead ion // inferred from expression pattern /// 0030324 // lung development // inferred from muta…	0005576 // extracellular region // inferred from electronic annotation /// 0005576 // extracellular region // not recorded /// 0005578 // proteinaceous extracellular matrix // inferred from electronic annotation /// 0005604 // basement membrane // inferred from electronic annotation /// 0005615 // extracellular space // inferred from direct assay /// 0005622 // intracellular // inferred from dire…	0005509 // calcium ion binding // inferred from direct assay /// 0005509 // calcium ion binding // inferred from electronic annotation /// 0005515 // protein binding // not recorded /// 0050840 // extracellular matrix binding // not recorded	---
1367563_at	14.1231	14.1446	13.5447	13.719	7.5998	8.18828	8.1243	8.59105	P	P	P	P	P	P	P	P	Rat Expression Array 230 2.0	Rattus norvegicus	2011-06-09	Consensus sequence	GenBank	Rn.31991.1	gb:D28875.1 /DB_XREF=gi:600380 /FEA=FLmRNA /CNT=304 /TID=Rn.31991.1 /TIER=FL+Stack /STK=109 /UG=Rn.31991 /LL=24791 /UG_GENE=Sparc /DEF=Rat mRNA for osteonectin, complete cds. /PROD=osteonectin /FL=gb:D28875.1 gb:NM_012656.1	D28875	Rn.31991	Rn.98989	November 2004 (Baylor College of Medicine HGSC Rnor3.4)	chr10:40809734-40822017 (-) // 89.84 // q11.1	secreted protein, acidic, cysteine-rich (osteonectin)	Sparc	chr10q22	full length	ENSRNOG00000012840	24791	D3ZYI8 /// P16975	---	---	NP_036788	NM_012656	---	---	---	---	---	---	0001503 // ossification // inferred from expression pattern /// 0007165 // signal transduction // inferred from electronic annotation /// 0007507 // heart development // inferred from expression pattern /// 0009629 // response to gravity // inferred from expression pattern /// 0010288 // response to lead ion // inferred from expression pattern /// 0030324 // lung development // inferred from muta…	0005576 // extracellular region // inferred from electronic annotation /// 0005576 // extracellular region // not recorded /// 0005578 // proteinaceous extracellular matrix // inferred from electronic annotation /// 0005604 // basement membrane // inferred from electronic annotation /// 0005615 // extracellular space // inferred from direct assay /// 0005622 // intracellular // inferred from dire…	0005509 // calcium ion binding // inferred from direct assay /// 0005509 // calcium ion binding // inferred from electronic annotation /// 0005515 // protein binding // not recorded /// 0050840 // extracellular matrix binding // not recorded	---
1367564_at	2.82093	2.77334	2.63615	2.68875	2.78514	2.94815	3.06461	2.95582	A	A	A	A	A	A	A	M	Rat Expression Array 230 2.0	Rattus norvegicus	2011-06-09	Consensus sequence	GenBank	Rn.2004.1	gb:NM_012612.1 /DB_XREF=gi:6981277 /GEN=Nppa /FEA=FLmRNA /CNT=132 /TID=Rn.2004.1 /TIER=FL+Stack /STK=122 /UG=Rn.2004 /LL=24602 /DEF=Rattus norvegicus Natriuretic peptide precursor A, (pronatriodilatin, also Anf, Pnd) (Nppa), mRNA. /PROD=natriuretic peptide precursor A,(pronatriodilatin, also Anf, Pnd) /FL=gb:M27498.1 gb:NM_012612.1	NM_012612	Rn.2004	Rn.2004	November 2004 (Baylor College of Medicine HGSC Rnor3.4)	chr5:165074521-165075845 (+) // 99.64 // q34	natriuretic peptide precursor A	Nppa	chr5q36	full length	ENSRNOG00000008176	24602	B0BMW5 /// P01161	---	---	NP_036744	NM_012612	---	---	---	---	0	---	0006182 // cGMP biosynthetic process // inferred from direct assay /// 0006182 // cGMP biosynthetic process // not recorded /// 0006182 // cGMP biosynthetic process // inferred from electronic annotation /// 0007168 // receptor guanylyl cyclase signaling pathway // not recorded /// 0007168 // receptor guanylyl cyclase signaling pathway // inferred from sequence or structural similarity /// 000716…	0005576 // extracellular region // inferred from electronic annotation /// 0005634 // nucleus // inferred from direct assay /// 0005737 // cytoplasm // inferred from direct assay /// 0005737 // cytoplasm // not recorded /// 0005737 // cytoplasm // inferred from electronic annotation /// 0042629 // mast cell granule // inferred from direct assay /// 0048471 // perinuclear region of cytoplasm // in…	0005102 // receptor binding // inferred from direct assay /// 0005102 // receptor binding // not recorded /// 0005102 // receptor binding // inferred from electronic annotation /// 0005179 // hormone activity // inferred from direct assay /// 0005179 // hormone activity // traceable author statement /// 0005179 // hormone activity // inferred from electronic annotation /// 0051428 // peptide horm…	---
1367565_a_at	14.5739	14.6037	14.5382	14.6958	14.1551	14.3841	14.197	14.2001	P	P	P	P	P	P	P	P	Rat Expression Array 230 2.0	Rattus norvegicus	2011-06-09	Consensus sequence	GenBank	Rn.54447.1	gb:NM_012848.1 /DB_XREF=gi:6978858 /GEN=Fth1 /FEA=FLmRNA /CNT=202 /TID=Rn.54447.1 /TIER=FL+Stack /STK=120 /UG=Rn.54447 /LL=25319 /DEF=Rattus norvegicus Ferritin subunit H (Fth1), mRNA. /PROD=ferritin subunit H /FL=gb:NM_012848.1 gb:U58829.1	NM_012848	Rn.54447	Rn.54447	November 2004 (Baylor College of Medicine HGSC Rnor3.4)	chr1:212430413-212432742 (+) // 96.44 // q32.3 /// chr1:24185760-24186634 (+) // 90.89 // p36.11 /// chr3:138280918-138281802 (+) // 94.33 // q22.3 /// chr5:99316911-99317784 (+) // 90.78 // q21.1	ferritin, heavy polypeptide 1	Fth1	chr1q43	full length	ENSRNOG00000022619 /// ENSRNOG00000033100	25319	A0JPM7 /// P19132 /// Q2TA66 /// Q5FVS1 /// Q66HI5 /// Q6AYV6 /// Q6LDW6 /// Q6P9V2	EC:1.16.3.1	---	NP_036980	NM_012848	---	---	---	---	---	---	0006826 // iron ion transport // inferred from electronic annotation /// 0006879 // cellular iron ion homeostasis // inferred from electronic annotation /// 0006892 // post-Golgi vesicle-mediated transport // not recorded /// 0006955 // immune response // inferred from sequence or structural similarity /// 0008285 // negative regulation of cell proliferation // inferred from sequence or structura…	0005739 // mitochondrion // inferred from electronic annotation /// 0005739 // mitochondrion // not recorded /// 0005829 // cytosol // not recorded	0004322 // ferroxidase activity // inferred from electronic annotation /// 0005488 // binding // inferred from electronic annotation /// 0005515 // protein binding // inferred from physical interaction /// 0005515 // protein binding // not recorded /// 0008199 // ferric iron binding // inferred from electronic annotation /// 0016491 // oxidoreductase activity // inferred from electronic annotatio…	---
1367566_at	2.28672	2.32846	2.23453	2.17612	2.2863	2.32592	2.4446	2.31871	A	A	A	A	A	A	A	A	Rat Expression Array 230 2.0	Rattus norvegicus	2011-06-09	Consensus sequence	GenBank	Rn.2206.1	gb:NM_013051.1 /DB_XREF=gi:6981693 /GEN=Ugb /FEA=FLmRNA /CNT=136 /TID=Rn.2206.1 /TIER=FL+Stack /STK=109 /UG=Rn.2206 /LL=25575 /DEF=Rattus norvegicus Uteroglobin (Clara cell secretory protein) (Ugb), mRNA. /PROD=uteroglobin (Clara cell secretory protein) /FL=gb:J05536.1 gb:NM_013051.1	NM_013051	Rn.2206	Rn.2206	November 2004 (Baylor College of Medicine HGSC Rnor3.4)	chr1:211758097-211761652 (-) // 98.08 // q32.3	secretoglobin, family 1A, member 1 (uteroglobin)	Scgb1a1	chr1q43	full length	ENSRNOG00000020196	25575	P17559	---	---	NP_037183	NM_013051	---	---	---	---	---	---	0000122 // negative regulation of transcription from RNA polymerase II promoter // inferred from electronic annotation /// 0000122 // negative regulation of transcription from RNA polymerase II promoter // not recorded /// 0032689 // negative regulation of interferon-gamma production // inferred from electronic annotation /// 0032689 // negative regulation of interferon-gamma production // not re…	0005576 // extracellular region // inferred from electronic annotation /// 0005737 // cytoplasm // inferred from electronic annotation /// 0005737 // cytoplasm // not recorded /// 0044424 // intracellular part // not recorded /// 0044424 // intracellular part // inferred from electronic annotation	0005488 // binding // inferred from electronic annotation /// 0019834 // phospholipase A2 inhibitor activity // inferred from electronic annotation	Prostaglandin_synthesis_regulation // GenMAPP
1367567_at	14.3761	14.3709	14.2635	14.483	13.7999	14.0375	13.8685	13.9036	P	P	P	P	P	P	P	P	Rat Expression Array 230 2.0	Rattus norvegicus	2011-06-09	Consensus sequence	GenBank	Rn.2660.1	gb:NM_053971.1 /DB_XREF=gi:16758863 /GEN=Rpl6 /FEA=FLmRNA /CNT=117 /TID=Rn.2660.1 /TIER=FL+Stack /STK=95 /UG=Rn.2660 /LL=117042 /DEF=Rattus norvegicus ribosomal protein L6 (Rpl6), mRNA. /PROD=ribosomal protein L6 /FL=gb:NM_053971.1	NM_053971	Rn.2660	Rn.2660	November 2004 (Baylor College of Medicine HGSC Rnor3.4)	chr6:129220788-129221737 (+) // 97.52 // q22.33 /// chr12:36483873-36487420 (-) // 96.08 // q11 /// chr17:21066110-21067059 (-) // 95.67 // p11.2	ribosomal protein L6	Rpl6	chr12q16	full length	ENSRNOG00000025936 /// ENSRNOG00000031889	117042	D4ADN2 /// P21533 /// Q6P790	---	---	NP_446423	NM_053971	---	---	---	---	---	---	0006412 // translation // inferred from electronic annotation	0005622 // intracellular // inferred from electronic annotation /// 0005840 // ribosome // inferred from electronic annotation /// 0030529 // ribonucleoprotein complex // inferred from electronic annotation	0003735 // structural constituent of ribosome // inferred from electronic annotation	Ribosomal_Proteins // GenMAPP
1367568_a_at	12.7603	12.8144	13.039	12.9544	2.03973	2.06833	2.10967	2.12547	P	P	P	P	A	A	A	A	Rat Expression Array 230 2.0	Rattus norvegicus	2011-06-09	Consensus sequence	GenBank	Rn.2379.1	gb:NM_012862.1 /DB_XREF=gi:6981203 /GEN=Mgp /FEA=FLmRNA /CNT=101 /TID=Rn.2379.1 /TIER=FL+Stack /STK=93 /UG=Rn.2379 /LL=25333 /DEF=Rattus norvegicus Matrix Gla protein (Mgp), mRNA. /PROD=matrix Gla protein /FL=gb:NM_012862.1 gb:J03026.1	NM_012862	Rn.2379	Rn.2379	November 2004 (Baylor College of Medicine HGSC Rnor3.4)	chr4:173910580-173913972 (-) // 99.33 // q34.1	matrix Gla protein	Mgp	chr4q43	full length	ENSRNOG00000005695	25333	P08494 /// Q5RK05	---	---	NP_036994	NM_012862	---	---	---	---	---	---	0001503 // ossification // inferred from expression pattern /// 0001503 // ossification // inferred from electronic annotation /// 0006461 // protein complex assembly // inferred from physical interaction /// 0007275 // multicellular organismal development // inferred from electronic annotation /// 0007584 // response to nutrient // inferred from expression pattern /// 0009612 // response to mech…	0005576 // extracellular region // inferred from electronic annotation /// 0005615 // extracellular space // inferred from direct assay /// 0005783 // endoplasmic reticulum // inferred from direct assay /// 0031012 // extracellular matrix // inferred from direct assay /// 0031012 // extracellular matrix // not recorded /// 0043234 // protein complex // inferred from direct assay	0005509 // calcium ion binding // inferred from direct assay /// 0005509 // calcium ion binding // inferred from electronic annotation /// 0048306 // calcium-dependent protein binding // inferred from physical interaction	---
1367569_at	13.9018	13.8565	13.8728	13.9728	13.3226	13.4872	13.3817	13.3834	P	P	P	P	P	P	P	P	Rat Expression Array 230 2.0	Rattus norvegicus	2011-06-09	Consensus sequence	GenBank	Rn.999.1	gb:NM_017138.1 /DB_XREF=gi:8393692 /GEN=Lamr1 /FEA=FLmRNA /CNT=120 /TID=Rn.999.1 /TIER=FL+Stack /STK=88 /UG=Rn.999 /LL=29236 /DEF=Rattus norvegicus laminin receptor 1 (Lamr1), mRNA. /PROD=laminin receptor 1 /FL=gb:D25224.1 gb:NM_017138.1	NM_017138	Rn.999	Rn.121972	November 2004 (Baylor College of Medicine HGSC Rnor3.4)	chr8:125100871-125104096 (+) // 94.27 // q24.13 /// chrX:157051476-157052488 (-) // 94.66 //	ribosomal protein SA	Rpsa	chr8q32	full length	ENSRNOG00000018645	29236	P38983	---	---	NP_058834	NM_017138	---	---	---	---	---	---	0006412 // translation // inferred from electronic annotation /// 0006414 // translational elongation // not recorded /// 0016337 // cell-cell adhesion // inferred from direct assay /// 0030855 // epithelial cell differentiation // inferred from expression pattern	0005604 // basement membrane // inferred from direct assay /// 0005622 // intracellular // inferred from electronic annotation /// 0005624 // membrane fraction // inferred from direct assay /// 0005634 // nucleus // inferred from electronic annotation /// 0005737 // cytoplasm // inferred from direct assay /// 0005737 // cytoplasm // inferred from electronic annotation /// 0005829 // cytosol // in…	0003735 // structural constituent of ribosome // inferred from electronic annotation /// 0004872 // receptor activity // inferred from electronic annotation /// 0005055 // laminin receptor activity // traceable author statement /// 0005198 // structural molecule activity // inferred by curator /// 0043022 // ribosome binding // not recorded /// 0043236 // laminin binding // not recorded	Ribosomal_Proteins // GenMAPP
1367570_at	10.2958	10.0072	9.97917	10.4313	2.32887	2.46903	2.47325	2.17458	P	P	P	P	A	A	A	A	Rat Expression Array 230 2.0	Rattus norvegicus	2011-06-09	Consensus sequence	GenBank	Rn.34397.1	gb:NM_031549.1 /DB_XREF=gi:13928743 /GEN=Tagln /FEA=FLmRNA /CNT=117 /TID=Rn.34397.1 /TIER=FL+Stack /STK=82 /UG=Rn.34397 /LL=25123 /DEF=Rattus norvegicus Transgelin (Smooth muscle 22 protein) (Tagln), mRNA. /PROD=see also D8Mcw1 /FL=gb:NM_031549.1 gb:M83107.1	NM_031549	Rn.34397	Rn.34397	November 2004 (Baylor College of Medicine HGSC Rnor3.4)	chr8:48901875-48907693 (-) // 92.93 // q11.21	transgelin	Tagln	chr8q24	full length	ENSRNOG00000017628	25123	P31232	---	---	NP_113737	NM_031549	---	---	---	---	---	---	0007010 // cytoskeleton organization // not recorded /// 0007517 // muscle organ development // inferred from electronic annotation	0005737 // cytoplasm // inferred from electronic annotation	0005515 // protein binding // not recorded /// 0005515 // protein binding // inferred from electronic annotation /// 0030674 // protein binding, bridging // traceable author statement /// 0051015 // actin filament binding // traceable author statement	---
1367571_a_at	3.16992	3.17816	3.42491	3.05883	2.70235	2.82774	2.76523	2.98251	A	A	A	A	A	A	A	A	Rat Expression Array 230 2.0	Rattus norvegicus	2011-06-09	Consensus sequence	GenBank	Rn.964.1	gb:NM_031511.1 /DB_XREF=gi:13937374 /GEN=Igf2 /FEA=FLmRNA /CNT=106 /TID=Rn.964.1 /TIER=FL+Stack /STK=82 /UG=Rn.964 /LL=24483 /DEF=Rattus norvegicus Insulin-like growth factor II (somatomedin A) (Igf2), mRNA. /PROD=insulin-like growth factor II (somatomedin A) /FL=gb:NM_031511.1	NM_031511	Rn.964	Rn.118681	November 2004 (Baylor College of Medicine HGSC Rnor3.4)	chr1:202906569-202915231 (-) // 91.46 // q32.1	insulin-like growth factor 2	Igf2	chr1q41	full length	ENSRNOG00000020369	24483	P01346 /// Q53WT7 /// Q63265	---	---	NP_001177091 /// NP_001177092 /// NP_113699	NM_001190162 /// NM_001190163 /// NM_031511	---	---	---	---	0	---	0001503 // ossification // inferred from electronic annotation /// 0001649 // osteoblast differentiation // inferred from electronic annotation /// 0005975 // carbohydrate metabolic process // inferred from electronic annotation /// 0006006 // glucose metabolic process // inferred from electronic annotation /// 0008283 // cell proliferation // traceable author statement /// 0009314 // response to…	0005576 // extracellular region // inferred from electronic annotation /// 0005615 // extracellular space // inferred from direct assay /// 0005615 // extracellular space // traceable author statement /// 0005615 // extracellular space // inferred from electronic annotation	0005158 // insulin receptor binding // inferred from electronic annotation /// 0005158 // insulin receptor binding // not recorded /// 0005159 // insulin-like growth factor receptor binding // inferred from electronic annotation /// 0005159 // insulin-like growth factor receptor binding // not recorded /// 0005179 // hormone activity // inferred from electronic annotation /// 0005515 // protein b…	---
1367572_at	2.44058	2.47912	2.55075	2.3365	2.5353	2.60654	2.72652	2.70608	A	A	A	A	A	A	A	A	Rat Expression Array 230 2.0	Rattus norvegicus	2011-06-09	Consensus sequence	GenBank	Rn.1955.1	gb:NM_012606.1 /DB_XREF=gi:6981239 /GEN=Myl3 /FEA=FLmRNA /CNT=83 /TID=Rn.1955.1 /TIER=FL+Stack /STK=76 /UG=Rn.1955 /LL=24585 /DEF=Rattus norvegicus Myosin light chain 3, alkali, cardiac ventricles (Myl3), mRNA. /PROD=myosin light chain 3, alkali, cardiacventricles /FL=gb:NM_012606.1	NM_012606	Rn.1955	Rn.1955	November 2004 (Baylor College of Medicine HGSC Rnor3.4)	chr8:115140711-115146818 (+) // 94.7 // q23.3	myosin, light chain 3, alkali; ventricular, skeletal, slow	Myl3	chr8q32	full length	ENSRNOG00000020955	24585	P16409	---	---	NP_036738	NM_012606	---	---	---	---	---	---	0002026 // regulation of the force of heart contraction // inferred from electronic annotation /// 0002026 // regulation of the force of heart contraction // not recorded /// 0006936 // muscle contraction // traceable author statement /// 0006942 // regulation of striated muscle contraction // inferred from electronic annotation /// 0006942 // regulation of striated muscle contraction // not reco…	0016459 // myosin complex // inferred from direct assay /// 0016459 // myosin complex // inferred from electronic annotation /// 0031672 // A band // inferred from electronic annotation /// 0031672 // A band // not recorded /// 0031674 // I band // inferred from electronic annotation /// 0031674 // I band // not recorded	0003774 // motor activity // inferred from direct assay /// 0003774 // motor activity // inferred from electronic annotation /// 0003785 // actin monomer binding // inferred from electronic annotation /// 0003785 // actin monomer binding // not recorded /// 0005509 // calcium ion binding // inferred from electronic annotation	Striated_muscle_contraction // GenMAPP
1367573_at	14.5506	14.5885	14.4275	14.5991	13.8138	14.0556	13.8318	13.8874	P	P	P	P	P	P	P	P	Rat Expression Array 230 2.0	Rattus norvegicus	2011-06-09	Consensus sequence	GenBank	Rn.34341.1	gb:NM_017160.1 /DB_XREF=gi:8394223 /GEN=Rps6 /FEA=FLmRNA /CNT=99 /TID=Rn.34341.1 /TIER=FL+Stack /STK=75 /UG=Rn.34341 /LL=29304 /DEF=Rattus norvegicus ribosomal protein S6 (Rps6), mRNA. /PROD=ribosomal protein S6 /FL=gb:M29358.1 gb:NM_017160.1	NM_017160	Rn.34341	Rn.34341	November 2004 (Baylor College of Medicine HGSC Rnor3.4)	chr5:106165611-106168485 (-) // 84.85 // q21.3	ribosomal protein S6	Rps6	chr5q22-q23	full length	ENSRNOG00000007663	29304	P62755	---	---	NP_058856	NM_017160	---	---	---	---	---	---	0000028 // ribosomal small subunit assembly // inferred from mutant phenotype /// 0000082 // G1/S transition of mitotic cell cycle // not recorded /// 0001890 // placenta development // not recorded /// 0002309 // T cell proliferation involved in immune response // not recorded /// 0006364 // rRNA processing // not recorded /// 0006412 // translation // inferred from electronic annotation /// 000…	0005622 // intracellular // inferred from electronic annotation /// 0005634 // nucleus // not recorded /// 0005730 // nucleolus // not recorded /// 0005737 // cytoplasm // not recorded /// 0005829 // cytosol // not recorded /// 0005840 // ribosome // not recorded /// 0005840 // ribosome // traceable author statement /// 0005840 // ribosome // inferred from electronic annotation /// 0005844 // pol…	0003735 // structural constituent of ribosome // inferred from mutant phenotype /// 0003735 // structural constituent of ribosome // traceable author statement /// 0003735 // structural constituent of ribosome // inferred from electronic annotation /// 0005515 // protein binding // not recorded	---
1367574_at	14.3074	14.2615	14.1999	14.3722	13.7847	13.9842	13.7982	14.0016	P	P	P	P	P	P	P	P	Rat Expression Array 230 2.0	Rattus norvegicus	2011-06-09	Consensus sequence	GenBank	Rn.2710.1	gb:NM_031140.1 /DB_XREF=gi:14389298 /GEN=Vim /FEA=FLmRNA /CNT=100 /TID=Rn.2710.1 /TIER=FL+Stack /STK=67 /UG=Rn.2710 /LL=81818 /DEF=Rattus norvegicus vimentin (Vim), mRNA. /PROD=vimentin /FL=gb:NM_031140.1	NM_031140	Rn.2710	Rn.2710	November 2004 (Baylor College of Medicine HGSC Rnor3.4)	chr17:87847238-87855767 (+) // 99.19 //	vimentin	Vim	chr17q12.3	full length	ENSRNOG00000018087	81818	P31000	---	---	NP_112402	NM_031140	---	---	---	---	---	---	0045103 // intermediate filament-based process // inferred from electronic annotation /// 0045103 // intermediate filament-based process // not recorded	0005634 // nucleus // inferred from electronic annotation /// 0005737 // cytoplasm // inferred from direct assay /// 0005737 // cytoplasm // not recorded /// 0005737 // cytoplasm // inferred from sequence or structural similarity /// 0005737 // cytoplasm // inferred from electronic annotation /// 0005829 // cytosol // not recorded /// 0005856 // cytoskeleton // not recorded /// 0005882 // interme…	0005198 // structural molecule activity // not recorded /// 0005198 // structural molecule activity // traceable author statement /// 0005198 // structural molecule activity // inferred from electronic annotation /// 0005200 // structural constituent of cytoskeleton // not recorded /// 0005200 // structural constituent of cytoskeleton // inferred from sequence or structural similarity /// 0005200…	Striated_muscle_contraction // GenMAPP
1367575_at	11.9239	11.8304	11.9603	12.024	12.9832	13.2555	13.0945	13.1009	P	P	P	P	P	P	P	P	Rat Expression Array 230 2.0	Rattus norvegicus	2011-06-09	Consensus sequence	GenBank	Rn.4236.1	gb:NM_012554.1 /DB_XREF=gi:6978808 /GEN=Eno1 /FEA=FLmRNA /CNT=91 /TID=Rn.4236.1 /TIER=FL+Stack /STK=64 /UG=Rn.4236 /LL=24333 /DEF=Rattus norvegicus Enolase 1, alpha (Eno1), mRNA. /PROD=enolase 1, alpha /FL=gb:NM_012554.1	NM_012554	Rn.4236	Rn.4236	November 2004 (Baylor College of Medicine HGSC Rnor3.4)	chr3:55201341-55203019 (+) // 94.71 // p14.3 /// chr5:167394628-167405515 (+) // 97.9 // q34 /// chr8:113075209-113076911 (+) // 88.91 // q23.3 /// chr1:106190698-106192426 (-) // 95.62 // p21.1 /// chr4:154051036-154052756 (-) // 96.47 // q31.3 /// chrX:41098850-41100501 (-) // 93.06 // p11.4	enolase 1, (alpha)	Eno1	chr5q36	full length	ENSRNOG00000008717 /// ENSRNOG00000017895 /// ENSRNOG00000024763	24333	D3ZJT8 /// P04764 /// Q5BJ93 /// Q5EB49	EC:4.2.1.11	---	NP_001103378 /// NP_036686	NM_001109908 /// NM_012554	---	---	---	---	---	---	0001701 // in utero embryonic development // not recorded /// 0006096 // glycolysis // traceable author statement /// 0006096 // glycolysis // inferred from electronic annotation /// 0008152 // metabolic process // not recorded /// 0009615 // response to virus // not recorded /// 0030308 // negative regulation of cell growth // not recorded /// 0045892 // negative regulation of transcription, DNA…	0000015 // phosphopyruvate hydratase complex // inferred from electronic annotation /// 0005625 // soluble fraction // inferred from direct assay /// 0005626 // insoluble fraction // inferred from direct assay /// 0005737 // cytoplasm // inferred from electronic annotation /// 0005737 // cytoplasm // not recorded /// 0005886 // plasma membrane // inferred from electronic annotation /// 0009986 //…	0000287 // magnesium ion binding // inferred from electronic annotation /// 0004252 // serine-type endopeptidase activity // inferred from electronic annotation /// 0004634 // phosphopyruvate hydratase activity // inferred from direct assay /// 0004634 // phosphopyruvate hydratase activity // not recorded /// 0004634 // phosphopyruvate hydratase activity // traceable author statement /// 0004634 …	Glycolysis_and_Gluconeogenesis // GenMAPP
1367576_at	13.03	12.9902	12.9834	13.1782	12.6815	12.725	12.6688	12.6553	P	P	P	P	P	P	P	P	Rat Expression Array 230 2.0	Rattus norvegicus	2011-06-09	Consensus sequence	GenBank	Rn.11323.1	gb:S41066.1 /DB_XREF=gi:252502 /FEA=FLmRNA /CNT=74 /TID=Rn.11323.1 /TIER=FL+Stack /STK=61 /UG=Rn.11323 /LL=24404 /UG_GENE=Gpx1 /DEF=Rattus norvegicus selenium-dependent glutathione peroxidase mRNA, complete cds. /PROD=selenium-dependent glutathione peroxidase /FL=gb:NM_030826.1 gb:S41066.1 gb:M21210.1	S41066	Rn.11323	Rn.11323	November 2004 (Baylor College of Medicine HGSC Rnor3.4)	chr16_random:1045520-1046574 (+) // 40.28 // /// chr14:19126932-19133032 (-) // 42.44 // q11.2	glutathione peroxidase 1	Gpx1	---	full length	---	24404	P04041 /// Q6PDW8	EC:1.11.1.9	---	NP_110453	NM_030826	---	---	---	---	---	---	0000302 // response to reactive oxygen species // not recorded /// 0001659 // temperature homeostasis // not recorded /// 0001836 // release of cytochrome c from mitochondria // not recorded /// 0001885 // endothelial cell development // not recorded /// 0002862 // negative regulation of inflammatory response to antigenic stimulus // not recorded /// 0006629 // lipid metabolic process // not reco…	0005625 // soluble fraction // inferred from direct assay /// 0005634 // nucleus // inferred from direct assay /// 0005737 // cytoplasm // inferred from electronic annotation /// 0005737 // cytoplasm // not recorded /// 0005739 // mitochondrion // not recorded /// 0005829 // cytosol // not recorded /// 0005829 // cytosol // traceable author statement	0004601 // peroxidase activity // inferred from electronic annotation /// 0004602 // glutathione peroxidase activity // inferred from direct assay /// 0004602 // glutathione peroxidase activity // not recorded /// 0004602 // glutathione peroxidase activity // inferred from electronic annotation /// 0004866 // endopeptidase inhibitor activity // not recorded /// 0008430 // selenium binding // infe…	Oxidative_Stress // GenMAPP
1367577_at	9.41655	9.46518	9.56828	9.36318	8.66602	8.77857	8.79724	8.93844	P	P	P	P	P	P	P	P	Rat Expression Array 230 2.0	Rattus norvegicus	2011-06-09	Consensus sequence	GenBank	Rn.3841.1	gb:NM_031970.1 /DB_XREF=gi:14010864 /GEN=Hspb1 /FEA=FLmRNA /CNT=62 /TID=Rn.3841.1 /TIER=FL+Stack /STK=58 /UG=Rn.3841 /LL=24471 /DEF=Rattus norvegicus heat shock 27kD protein 1 (Hspb1), mRNA. /PROD=heat shock 27kD protein 1 /FL=gb:M86389.1 gb:NM_031970.1	NM_031970	Rn.3841	Rn.3841	November 2004 (Baylor College of Medicine HGSC Rnor3.4)	chr12:21911200-21912765 (-) // 93.62 // p12.1	heat shock protein 1	Hspb1	chr12q12	full length	ENSRNOG00000023546	24471	D3ZNT4 /// P42930	---	---	NP_114176	NM_031970	---	---	---	---	---	---	0006916 // anti-apoptosis // traceable author statement /// 0006950 // response to stress // inferred from electronic annotation /// 0009408 // response to heat // inferred from electronic annotation /// 0009615 // response to virus // inferred from electronic annotation /// 0009615 // response to virus // not recorded	0000502 // proteasome complex // inferred from direct assay /// 0005622 // intracellular // inferred from electronic annotation /// 0005622 // intracellular // not recorded /// 0005625 // soluble fraction // inferred from electronic annotation /// 0005625 // soluble fraction // not recorded /// 0005626 // insoluble fraction // inferred from electronic annotation /// 0005626 // insoluble fraction …	0005515 // protein binding // inferred from physical interaction /// 0005515 // protein binding // not recorded /// 0005515 // protein binding // inferred from electronic annotation /// 0042802 // identical protein binding // inferred from electronic annotation /// 0042802 // identical protein binding // not recorded /// 0043130 // ubiquitin binding // inferred from direct assay	---
1367578_at	12.768	12.7959	12.8792	12.9361	12.6599	12.7548	12.6493	12.6063	P	P	P	P	P	P	P	P	Rat Expression Array 230 2.0	Rattus norvegicus	2011-06-09	Consensus sequence	GenBank	Rn.2511.1	gb:NM_017169.1 /DB_XREF=gi:8394431 /GEN=Prdx2 /FEA=FLmRNA /CNT=71 /TID=Rn.2511.1 /TIER=FL+Stack /STK=55 /UG=Rn.2511 /LL=29338 /DEF=Rattus norvegicus peroxiredoxin 2 (Prdx2), mRNA. /PROD=thioredoxin peroxidase 1 /FL=gb:NM_017169.1 gb:U06099.1	NM_017169	Rn.2511	Rn.2511	November 2004 (Baylor College of Medicine HGSC Rnor3.4)	chr19:24836199-24841449 (-) // 97.29 // p11	peroxiredoxin 2	Prdx2	chr19q11	full length	ENSRNOG00000003520	29338	P35704	EC:1.11.1.15	---	NP_058865	NM_017169	---	---	---	---	---	---	0000187 // activation of MAPK activity // not recorded /// 0002536 // respiratory burst involved in inflammatory response // not recorded /// 0006916 // anti-apoptosis // not recorded /// 0006979 // response to oxidative stress // inferred from mutant phenotype /// 0006979 // response to oxidative stress // not recorded /// 0010310 // regulation of hydrogen peroxide metabolic process // not recor…	0005737 // cytoplasm // inferred from electronic annotation /// 0005739 // mitochondrion // not recorded /// 0005829 // cytosol // inferred from direct assay	0004601 // peroxidase activity // inferred from electronic annotation /// 0005515 // protein binding // not recorded /// 0008379 // thioredoxin peroxidase activity // not recorded /// 0016209 // antioxidant activity // not recorded /// 0016209 // antioxidant activity // inferred from electronic annotation /// 0016491 // oxidoreductase activity // inferred from electronic annotation /// 0051920 //…	---
1367579_a_at	13.9881	14.0208	14.0207	14.0958	13.7476	13.9513	13.7716	13.7705	P	P	P	P	P	P	P	P	Rat Expression Array 230 2.0	Rattus norvegicus	2011-06-09	Consensus sequence	GenBank	Rn.54749.3	gb:BI285434 /DB_XREF=gi:14939068 /DB_XREF=UI-R-DD0-caa-a-11-0-UI.s1 /CLONE=UI-R-DD0-caa-a-11-0-UI /FEA=EST /CNT=12 /TID=Rn.54749.3 /TIER=Stack /STK=11 /UG=Rn.54749 /LL=64158 /UG_GENE=Tuba1 /UG_TITLE=alpha-tubulin	BI285434	Rn.54749	Rn.154526	November 2004 (Baylor College of Medicine HGSC Rnor3.4)	chr5:162120453-162121160 (+) // 75.61 // q34 /// chr7:137816722-137817448 (+) // 97.7 // q33 /// chrX:157580752-157581334 (+) // 75.75 // /// chr7:137729648-137730230 (-) // 76.56 // q33 /// chr7:137707065-137707647 (-) // 76.29 // q33	tubulin, alpha 1A /// tubulin, alpha 1B /// tubulin, alpha 1C	Tuba1a /// Tuba1b /// Tuba1c	chr7q36	full length	ENSRNOG00000004559 /// ENSRNOG00000015544 /// ENSRNOG00000032138	300218 /// 500929 /// 64158	D4A8I4 /// P68370 /// Q6AYZ1 /// Q6P9V9	---	---	NP_001011995 /// NP_001037735 /// NP_071634	NM_001011995 /// NM_001044270 /// NM_022298	---	---	---	---	---	---	0007017 // microtubule-based process // traceable author statement /// 0007017 // microtubule-based process // inferred from electronic annotation /// 0007018 // microtubule-based movement // inferred from electronic annotation /// 0051258 // protein polymerization // inferred from electronic annotation	0005829 // cytosol // not recorded /// 0005874 // microtubule // traceable author statement /// 0005874 // microtubule // inferred from electronic annotation /// 0005881 // cytoplasmic microtubule // not recorded /// 0043234 // protein complex // inferred from electronic annotation	0000166 // nucleotide binding // inferred from electronic annotation /// 0003924 // GTPase activity // inferred from electronic annotation /// 0005198 // structural molecule activity // inferred from electronic annotation /// 0005515 // protein binding // inferred from electronic annotation /// 0005515 // protein binding // not recorded /// 0005525 // GTP binding // inferred from electronic annot…	---
1367580_at	13.9243	13.9656	13.8753	14.064	13.3132	13.4949	13.2758	13.3888	P	P	P	P	P	P	P	P	Rat Expression Array 230 2.0	Rattus norvegicus	2011-06-09	Consensus sequence	GenBank	Rn.2262.1	gb:NM_031065.1 /DB_XREF=gi:13592008 /GEN=Rpl10a /FEA=FLmRNA /CNT=70 /TID=Rn.2262.1 /TIER=FL+Stack /STK=54 /UG=Rn.2262 /LL=81729 /DEF=Rattus norvegicus ribosomal protein L10a (Rpl10a), mRNA. /PROD=ribosomal protein L10a /FL=gb:NM_031065.1	NM_031065	Rn.2262	Rn.2262	November 2004 (Baylor College of Medicine HGSC Rnor3.4)	chr10:55832728-55833290 (+) // 70.35 // q21.1 /// chr20:6569082-6984229 (+) // 95.35 // p12.3 /// chr4:4988505-4989247 (+) // 94.15 // p16.2 /// chr10:98574973-98575704 (-) // 90.16 // q24.1 /// chr5:141592368-141593379 (-) // 92.69 // q31.3 /// chr6:91467345-91468052 (-) // 91.62 // q15 /// chr9:20068795-20069524 (-) // 90.96 // p21.3 /// chr4:170284860-170285582 (-) // 90.03 // q33	ribosomal protein L10A	Rpl10a	chr20p12	full length	ENSRNOG00000000505 /// ENSRNOG00000031078	81729	D4A7Y6 /// P62907 /// Q4KM60	---	---	NP_112327	NM_031065	---	---	---	---	---	---	0006396 // RNA processing // inferred from electronic annotation /// 0006412 // translation // inferred from electronic annotation /// 0006414 // translational elongation // not recorded	0005622 // intracellular // inferred from electronic annotation /// 0005739 // mitochondrion // not recorded /// 0005829 // cytosol // not recorded /// 0005840 // ribosome // inferred from electronic annotation /// 0022625 // cytosolic large ribosomal subunit // traceable author statement /// 0030529 // ribonucleoprotein complex // inferred from electronic annotation	0003723 // RNA binding // inferred from electronic annotation /// 0003735 // structural constituent of ribosome // inferred from electronic annotation	---
1367581_a_at	3.30366	3.40913	3.68365	3.26707	2.73291	2.60792	2.9766	2.72249	A	M	P	P	A	A	A	A	Rat Expression Array 230 2.0	Rattus norvegicus	2011-06-09	Consensus sequence	GenBank	Rn.8871.3	gb:AB001382.1 /DB_XREF=gi:1871123 /FEA=FLmRNA /CNT=1 /TID=Rn.8871.3 /TIER=FL /STK=1 /UG=Rn.8871 /LL=25353 /UG_GENE=Spp1 /DEF=Rattus norvegicus mRNA for osteopontin, complete cds. /PROD=osteopontin /FL=gb:AB001382.1	AB001382	Rn.8871	Rn.8871	November 2004 (Baylor College of Medicine HGSC Rnor3.4)	chr14:6422741-6426384 (-) // 57.02 // p12	secreted phosphoprotein 1	Spp1	chr14p22	full length	---	25353	P08721 /// P97827	---	---	NP_037013	NM_012881	---	---	---	---	---	---	0001503 // ossification // inferred from electronic annotation /// 0001649 // osteoblast differentiation // inferred from mutant phenotype /// 0006954 // inflammatory response // inferred from expression pattern /// 0007155 // cell adhesion // inferred from direct assay /// 0007155 // cell adhesion // inferred from mutant phenotype /// 0007155 // cell adhesion // inferred from electronic annotati…	0005576 // extracellular region // not recorded /// 0005576 // extracellular region // inferred from electronic annotation /// 0005615 // extracellular space // inferred from direct assay /// 0005615 // extracellular space // traceable author statement /// 0005615 // extracellular space // inferred from electronic annotation /// 0005737 // cytoplasm // not recorded /// 0031988 // membrane-bounded…	0005125 // cytokine activity // inferred from electronic annotation /// 0050840 // extracellular matrix binding // not recorded	TGF_Beta_Signaling_Pathway // GenMAPP
1367582_at	14.0006	14.0242	13.9226	14.0931	13.3754	13.4765	13.3493	13.4088	P	P	P	P	P	P	P	P	Rat Expression Array 230 2.0	Rattus norvegicus	2011-06-09	Consensus sequence	GenBank	Rn.3973.1	gb:NM_017150.1 /DB_XREF=gi:8394208 /GEN=Rpl29 /FEA=FLmRNA /CNT=72 /TID=Rn.3973.1 /TIER=FL+Stack /STK=53 /UG=Rn.3973 /LL=29283 /DEF=Rattus norvegicus ribosomal protein L29 (Rpl29), mRNA. /PROD=ribosomal protein L29 /FL=gb:NM_017150.1	NM_017150	Rn.3973	Rn.3973	November 2004 (Baylor College of Medicine HGSC Rnor3.4)	chr6:59001742-59002378 (+) // 91.9 // p11.1 /// chr8:111573451-111575492 (+) // 91.75 // q23.2 /// chr20:25441578-25442177 (-) // 84.09 // p11.21 /// chr4:117807251-117808030 (-) // 89.1 // q26	ribosomal protein L29	Rpl29	chr8q32	full length	ENSRNOG00000011138 /// ENSRNOG00000029594	29283	P25886	---	---	NP_058846	NM_017150	---	---	---	---	---	---	0006412 // translation // inferred from electronic annotation /// 0006412 // translation // not recorded /// 0006414 // translational elongation // not recorded /// 0008283 // cell proliferation // not recorded /// 0031589 // cell-substrate adhesion // not recorded /// 0035264 // multicellular organism growth // not recorded	0000300 // peripheral to membrane of membrane fraction // not recorded /// 0005622 // intracellular // inferred from electronic annotation /// 0005829 // cytosol // not recorded /// 0005840 // ribosome // inferred from electronic annotation /// 0022626 // cytosolic ribosome // not recorded /// 0030529 // ribonucleoprotein complex // inferred from electronic annotation /// 0042788 // polysomal rib…	0003735 // structural constituent of ribosome // inferred from electronic annotation /// 0005515 // protein binding // not recorded /// 0008201 // heparin binding // not recorded	Ribosomal_Proteins // GenMAPP
1367583_at	14.7092	14.7433	14.5738	14.7704	13.4977	13.707	13.4641	13.5139	P	P	P	P	P	P	P	P	Rat Expression Array 230 2.0	Rattus norvegicus	2011-06-09	Consensus sequence	GenBank	Rn.36610.1	gb:NM_053867.1 /DB_XREF=gi:16758733 /GEN=Tpt1 /FEA=FLmRNA /CNT=86 /TID=Rn.36610.1 /TIER=FL+Stack /STK=52 /UG=Rn.36610 /LL=116646 /DEF=Rattus norvegicus tumor protein, translationally-controlled 1 (Tpt1), mRNA. /PROD=tumor protein, translationally-controlled 1 /FL=gb:U20525.1 gb:NM_053867.1	NM_053867	Rn.36610	Rn.36610	November 2004 (Baylor College of Medicine HGSC Rnor3.4)	chr1:19563338-19564155 (+) // 90.5 // p36.13 /// chr15:56752422-56755288 (+) // 94.49 // q21.3 /// chr16:12912118-12913081 (+) // 89.33 // p13.12 /// chr7:136155367-136156185 (-) // 92.26 // q33	tumor protein, translationally-controlled 1	Tpt1	chr15q11	full length	ENSRNOG00000001049	116646	P63029	---	---	NP_446319	NM_053867	---	---	---	---	---	---	0006916 // anti-apoptosis // not recorded /// 0007283 // spermatogenesis // inferred from expression pattern /// 0008283 // cell proliferation // traceable author statement /// 0009615 // response to virus // not recorded	0005615 // extracellular space // not recorded /// 0005737 // cytoplasm // inferred from electronic annotation /// 0005737 // cytoplasm // not recorded /// 0005771 // multivesicular body // not recorded /// 0045298 // tubulin complex // not recorded	0005509 // calcium ion binding // not recorded /// 0005515 // protein binding // not recorded	---
1367584_at	14.1332	14.103	14.0848	14.2188	13.6391	13.8409	13.6728	13.7473	P	P	P	P	P	P	P	P	Rat Expression Array 230 2.0	Rattus norvegicus	2011-06-09	Consensus sequence	GenBank	Rn.28.1	gb:NM_019905.1 /DB_XREF=gi:9845233 /GEN=Anxa2 /FEA=FLmRNA /CNT=80 /TID=Rn.28.1 /TIER=FL+Stack /STK=52 /UG=Rn.28 /LL=56611 /DEF=Rattus norvegicus calpactin I heavy chain (Anxa2), mRNA. /PROD=calpactin I heavy chain /FL=gb:NM_019905.1 gb:L13039.1	NM_019905	Rn.28	Rn.90546	November 2004 (Baylor College of Medicine HGSC Rnor3.4)	chr8:73907096-73934041 (+) // 91.62 // q21.11	annexin A2	Anxa2	chr8q24	full length	ENSRNOG00000010362	56611	Q07936	---	---	NP_063970	NM_019905	---	---	---	---	---	---	0001525 // angiogenesis // inferred from electronic annotation /// 0001525 // angiogenesis // not recorded /// 0007589 // body fluid secretion // inferred from mutant phenotype /// 0030199 // collagen fibril organization // inferred from electronic annotation /// 0030199 // collagen fibril organization // not recorded /// 0031340 // positive regulation of vesicle fusion // inferred from electroni…	0005576 // extracellular region // inferred from electronic annotation /// 0005578 // proteinaceous extracellular matrix // inferred from electronic annotation /// 0005604 // basement membrane // inferred from electronic annotation /// 0005737 // cytoplasm // inferred from direct assay /// 0005737 // cytoplasm // not recorded /// 0005737 // cytoplasm // inferred from electronic annotation /// 000…	0004859 // phospholipase inhibitor activity // inferred from electronic annotation /// 0005509 // calcium ion binding // traceable author statement /// 0005509 // calcium ion binding // inferred from electronic annotation /// 0005515 // protein binding // not recorded /// 0005515 // protein binding // non-traceable author statement /// 0005515 // protein binding // inferred from electronic annota…	Prostaglandin_synthesis_regulation // GenMAPP
1367585_a_at	12.1921	12.1165	12.1819	12.1658	12.31	12.4685	12.4804	12.4049	P	P	P	P	P	P	P	P	Rat Expression Array 230 2.0	Rattus norvegicus	2011-06-09	Consensus sequence	GenBank	Rn.2992.2	gb:M28647.1 /DB_XREF=gi:205631 /GEN=Na,K-ATPase /FEA=FLmRNA /CNT=2 /TID=Rn.2992.2 /TIER=FL /STK=1 /UG=Rn.2992 /LL=24211 /DEF=Rattus norvegicus Na,K-ATPase alpha-1 subunit mRNA, complete cds. /PROD=Na,K-ATPase alpha-1 subunit /FL=gb:M28647.1	M28647	Rn.2992	Rn.217534	November 2004 (Baylor College of Medicine HGSC Rnor3.4)	chr2:196657931-196687242 (-) // 66.1 // q32.3	ATPase, Na+/K+ transporting, alpha 1 polypeptide	Atp1a1	chr2q34	full length	ENSRNOG00000030019	24211	P06685 /// Q64608	EC:3.6.3.9	---	NP_036636	NM_012504	---	---	---	---	0	---	0002026 // regulation of the force of heart contraction // not recorded /// 0006200 // ATP catabolic process // not recorded /// 0006200 // ATP catabolic process // traceable author statement /// 0006754 // ATP biosynthetic process // inferred from electronic annotation /// 0006810 // transport // inferred from electronic annotation /// 0006811 // ion transport // inferred from electronic annotat…	0005624 // membrane fraction // inferred from direct assay /// 0005768 // endosome // inferred from direct assay /// 0005792 // microsome // not recorded /// 0005886 // plasma membrane // not recorded /// 0005890 // sodium:potassium-exchanging ATPase complex // inferred from direct assay /// 0005890 // sodium:potassium-exchanging ATPase complex // non-traceable author statement /// 0005901 // cav…	0000166 // nucleotide binding // inferred from electronic annotation /// 0003824 // catalytic activity // inferred from electronic annotation /// 0003869 // 4-nitrophenylphosphatase activity // not recorded /// 0005391 // sodium:potassium-exchanging ATPase activity // inferred from direct assay /// 0005391 // sodium:potassium-exchanging ATPase activity // not recorded /// 0005391 // sodium:potass…	---
1367586_at	12.8588	12.8191	12.8739	12.9202	13.3159	13.5772	13.3791	13.4151	P	P	P	P	P	P	P	P	Rat Expression Array 230 2.0	Rattus norvegicus	2011-06-09	Consensus sequence	GenBank	Rn.3687.1	gb:NM_017025.1 /DB_XREF=gi:8393705 /GEN=Ldha /FEA=FLmRNA /CNT=92 /TID=Rn.3687.1 /TIER=FL+Stack /STK=50 /UG=Rn.3687 /LL=24533 /DEF=Rattus norvegicus Lactate dehydrogenase A (Ldha), mRNA. /PROD=lactate dehydrogenase A /FL=gb:NM_017025.1	NM_017025	Rn.3687	Rn.107896	November 2004 (Baylor College of Medicine HGSC Rnor3.4)	chr1:97402774-97412547 (+) // 97.78 // p21.3 /// chr8:31685564-31687184 (+) // 80.99 // p12 /// chr6:78686332-78687940 (-) // 80.99 // q14.1 /// chr7:13217259-13218983 (-) // 79.8 // p21.3	lactate dehydrogenase A	Ldha	chr1q22	full length	ENSRNOG00000013009	24533	B5DEN4 /// P04642 /// Q6P9U7	EC:1.1.1.27	---	NP_058721	NM_017025	---	---	---	---	---	---	0001666 // response to hypoxia // inferred from expression pattern /// 0005975 // carbohydrate metabolic process // inferred from electronic annotation /// 0006089 // lactate metabolic process // inferred from direct assay /// 0006096 // glycolysis // inferred from electronic annotation /// 0007584 // response to nutrient // inferred from expression pattern /// 0008152 // metabolic process // not…	0005625 // soluble fraction // inferred from direct assay /// 0005737 // cytoplasm // inferred from electronic annotation /// 0005739 // mitochondrion // not recorded /// 0005829 // cytosol // not recorded /// 0019861 // flagellum // not recorded	0003824 // catalytic activity // inferred from electronic annotation /// 0004457 // lactate dehydrogenase activity // inferred from direct assay /// 0004459 // L-lactate dehydrogenase activity // inferred from direct assay /// 0004459 // L-lactate dehydrogenase activity // not recorded /// 0004459 // L-lactate dehydrogenase activity // inferred from electronic annotation /// 0005488 // binding //…	Glycolysis_and_Gluconeogenesis // GenMAPP
1367587_at	2.03957	2.13166	2.21076	2.02505	2.15593	2.03942	1.94831	2.07194	P	M	P	A	M	A	A	P	Rat Expression Array 230 2.0	Rattus norvegicus	2011-06-09	Consensus sequence	GenBank	Rn.1259.1	gb:NM_033233.1 /DB_XREF=gi:15100176 /GEN=Csh1v /FEA=FLmRNA /CNT=57 /TID=Rn.1259.1 /TIER=FL+Stack /STK=50 /UG=Rn.1259 /LL=24282 /DEF=Rattus norvegicus Chorionic somatomammotropin hormone 1 variant; Placental lactogen-1 (Csh1v), mRNA. /PROD=chorionic somatomammotropin hormone 1 variant;Placental lactogen-1 /FL=gb:U32679.1 gb:NM_033233.1	NM_033233	Rn.1259	Rn.1259	November 2004 (Baylor College of Medicine HGSC Rnor3.4)	chr17:43908835-43914450 (-) // 90.59 // q21.31	prolactin family 3, subfamily d, member 4	Prl3d4	chr17p11	full length	ENSRNOG00000016792	24282	P34207	---	---	NP_150236	NM_033233	---	---	---	---	---	---	0008284 // positive regulation of cell proliferation // inferred from mutant phenotype /// 0042976 // activation of Janus kinase activity // inferred from mutant phenotype	0005576 // extracellular region // inferred from electronic annotation	0005148 // prolactin receptor binding // inferred from mutant phenotype /// 0005179 // hormone activity // inferred from electronic annotation	---
1367588_a_at	14.8025	14.8669	14.8237	14.9524	14.0967	14.065	14.019	14.1414	P	P	P	P	P	P	P	P	Rat Expression Array 230 2.0	Rattus norvegicus	2011-06-09	Consensus sequence	GenBank	Rn.54827.1	gb:NM_022179.1 /DB_XREF=gi:11559936 /GEN=Hk3 /FEA=FLmRNA /CNT=87 /TID=Rn.54827.1 /TIER=FL+Stack /STK=49 /UG=Rn.54827 /LL=25060 /DEF=Rattus norvegicus Hexokinase 3 (Hk3), mRNA. /PROD=hexokinase 3 /FL=gb:U73859.1 gb:NM_022179.1	NM_022179	Rn.54827	Rn.92211	November 2004 (Baylor College of Medicine HGSC Rnor3.4)	chr17:15651952-15669109 (+) // 74.06 // p12	ribosomal protein L13A	Rpl13a	chr1q22	full length	ENSRNOG00000020618	317646	P35427 /// Q5RK10	---	---	NP_775462	NM_173340	---	---	---	---	---	---	0006412 // translation // inferred from electronic annotation /// 0006414 // translational elongation // not recorded	0005622 // intracellular // inferred from electronic annotation /// 0005829 // cytosol // not recorded /// 0005840 // ribosome // non-traceable author statement /// 0005840 // ribosome // inferred from electronic annotation /// 0015934 // large ribosomal subunit // inferred from electronic annotation /// 0030529 // ribonucleoprotein complex // not recorded /// 0030529 // ribonucleoprotein complex…	0003735 // structural constituent of ribosome // non-traceable author statement /// 0003735 // structural constituent of ribosome // inferred from electronic annotation	Ribosomal_Proteins // GenMAPP
1367589_at	10.6648	10.733	10.7959	10.5967	10.3078	10.4834	10.4909	10.52	P	P	P	P	P	P	P	P	Rat Expression Array 230 2.0	Rattus norvegicus	2011-06-09	Consensus sequence	GenBank	Rn.43737.1	gb:NM_024398.1 /DB_XREF=gi:13242311 /GEN=Aco2 /FEA=FLmRNA /CNT=70 /TID=Rn.43737.1 /TIER=FL+Stack /STK=49 /UG=Rn.43737 /LL=79250 /DEF=Rattus norvegicus mitochondrial aconitase (nuclear aco2 gene) (Aco2), mRNA. /PROD=mitochondrial aconitase (nuclear aco2 gene) /FL=gb:NM_024398.1	NM_024398	Rn.43737	Rn.43737	November 2004 (Baylor College of Medicine HGSC Rnor3.4)	chr7:120223784-120266936 (+) // 91.98 // q31.31	aconitase 2, mitochondrial	Aco2	chr7q34	full length	ENSRNOG00000024128	79250	Q9ER34	EC:4.2.1.3	---	NP_077374	NM_024398	---	---	---	---	---	---	0006099 // tricarboxylic acid cycle // inferred from direct assay /// 0006099 // tricarboxylic acid cycle // inferred from electronic annotation /// 0006099 // tricarboxylic acid cycle // not recorded /// 0006101 // citrate metabolic process // inferred from direct assay /// 0006101 // citrate metabolic process // not recorded /// 0006102 // isocitrate metabolic process // inferred from direct as…	0005634 // nucleus // not recorded /// 0005739 // mitochondrion // inferred from direct assay /// 0005739 // mitochondrion // not recorded /// 0005739 // mitochondrion // inferred from electronic annotation	0003994 // aconitate hydratase activity // inferred from direct assay /// 0003994 // aconitate hydratase activity // inferred from electronic annotation /// 0003994 // aconitate hydratase activity // not recorded /// 0005506 // iron ion binding // not recorded /// 0005515 // protein binding // inferred from physical interaction /// 0016829 // lyase activity // inferred from electronic annotation …	Krebs-TCA_Cycle // GenMAPP
1367590_at	13.8622	13.7805	13.7807	13.8902	13.7698	13.9236	13.8155	13.7604	P	P	P	P	P	P	P	P	Rat Expression Array 230 2.0	Rattus norvegicus	2011-06-09	Consensus sequence	GenBank	Rn.2525.1	gb:NM_053439.1 /DB_XREF=gi:16758181 /GEN=Ran /FEA=FLmRNA /CNT=67 /TID=Rn.2525.1 /TIER=FL+Stack /STK=49 /UG=Rn.2525 /LL=84509 /DEF=Rattus norvegicus RAN, member RAS oncogene family (Ran), mRNA. /PROD=RAN, member RAS oncogene family /FL=gb:NM_053439.1 gb:AF306457.1	NM_053439	Rn.2525	Rn.107698	November 2004 (Baylor College of Medicine HGSC Rnor3.4)	chr12:28736788-28739921 (-) // 95.94 // p11.22	RAN, member RAS oncogene family	Ran	chr12q14	full length	ENSRNOG00000000938	84509	P62828	---	---	NP_445891	NM_053439	---	---	---	---	---	---	0000226 // microtubule cytoskeleton organization // traceable author statement /// 0006606 // protein import into nucleus // not recorded /// 0006606 // protein import into nucleus // traceable author statement /// 0006606 // protein import into nucleus // inferred from electronic annotation /// 0006611 // protein export from nucleus // traceable author statement /// 0006810 // transport // infer…	0000785 // chromatin // not recorded /// 0005634 // nucleus // inferred from direct assay /// 0005634 // nucleus // not recorded /// 0005634 // nucleus // inferred from electronic annotation /// 0005654 // nucleoplasm // not recorded /// 0005737 // cytoplasm // not recorded /// 0005737 // cytoplasm // inferred from electronic annotation /// 0005829 // cytosol // not recorded /// 0042470 // melano…	0000166 // nucleotide binding // inferred from electronic annotation /// 0003924 // GTPase activity // not recorded /// 0003924 // GTPase activity // traceable author statement /// 0003924 // GTPase activity // inferred from electronic annotation /// 0005515 // protein binding // not recorded /// 0005515 // protein binding // inferred from electronic annotation /// 0005525 // GTP binding // not r…	---
1367591_at	11.5485	11.4644	11.5347	11.4306	12.4373	12.5547	12.4488	12.4718	P	P	P	P	P	P	P	P	Rat Expression Array 230 2.0	Rattus norvegicus	2011-06-09	Consensus sequence	GenBank	Rn.2011.1	gb:NM_022540.1 /DB_XREF=gi:11968131 /GEN=Prdx3 /FEA=FLmRNA /CNT=58 /TID=Rn.2011.1 /TIER=FL+Stack /STK=48 /UG=Rn.2011 /LL=64371 /DEF=Rattus norvegicus peroxiredoxin 3 (Prdx3), mRNA. /PROD=peroxiredoxin 3 /FL=gb:AF106944.1 gb:NM_022540.1	NM_022540	Rn.2011	Rn.2011	November 2004 (Baylor College of Medicine HGSC Rnor3.4)	chr1:267467874-267481273 (-) // 94.95 //	peroxiredoxin 3	Prdx3	chr1q55	full length	ENSRNOG00000010958	64371	Q9Z0V6	EC:1.11.1.15	---	NP_071985	NM_022540	---	---	---	---	---	---	0001893 // maternal placenta development // inferred from electronic annotation /// 0001893 // maternal placenta development // not recorded /// 0006979 // response to oxidative stress // inferred from electronic annotation /// 0006979 // response to oxidative stress // not recorded /// 0007005 // mitochondrion organization // inferred from electronic annotation /// 0007005 // mitochondrion organ…	0005737 // cytoplasm // inferred from electronic annotation /// 0005737 // cytoplasm // not recorded /// 0005739 // mitochondrion // inferred from direct assay /// 0005739 // mitochondrion // not recorded /// 0005739 // mitochondrion // inferred from electronic annotation /// 0005769 // early endosome // inferred from electronic annotation /// 0005769 // early endosome // not recorded /// 0008385…	0004601 // peroxidase activity // inferred from electronic annotation /// 0005515 // protein binding // not recorded /// 0005515 // protein binding // inferred from electronic annotation /// 0008022 // protein C-terminus binding // inferred from electronic annotation /// 0008022 // protein C-terminus binding // not recorded /// 0016209 // antioxidant activity // inferred from electronic annotatio…	---
1367592_at	2.20787	2.06528	1.99702	2.22523	2.84736	2.84123	2.66629	2.56532	A	A	A	A	A	A	A	A	Rat Expression Array 230 2.0	Rattus norvegicus	2011-06-09	Consensus sequence	GenBank	Rn.9965.1	gb:NM_012676.1 /DB_XREF=gi:6981665 /GEN=Tnnt2 /FEA=FLmRNA /CNT=52 /TID=Rn.9965.1 /TIER=FL+Stack /STK=48 /UG=Rn.9965 /LL=24837 /DEF=Rattus norvegicus Troponin T, cardiac (Tnnt2), mRNA. /PROD=troponin T, cardiac /FL=gb:M26052.1 gb:NM_012676.1 gb:M26051.1	NM_012676	Rn.9965	Rn.9965	November 2004 (Baylor College of Medicine HGSC Rnor3.4)	chr13:48872971-48885820 (+) // 98.04 // q14.2	troponin T type 2 (cardiac)	Tnnt2	chr13q13	full length	ENSRNOG00000033734	24837	A9YUA5 /// B1WBR4 /// D3ZEE0 /// D4ACS8 /// P50753	---	---	NP_036808	NM_012676	---	---	---	---	---	---	0006936 // muscle contraction // inferred from mutant phenotype /// 0006936 // muscle contraction // not recorded /// 0006936 // muscle contraction // traceable author statement /// 0006937 // regulation of muscle contraction // inferred from direct assay /// 0007507 // heart development // not recorded /// 0008016 // regulation of heart contraction // not recorded /// 0030049 // muscle filament …	0005737 // cytoplasm // not recorded /// 0005861 // troponin complex // inferred from direct assay /// 0005861 // troponin complex // not recorded /// 0005865 // striated muscle thin filament // not recorded /// 0030016 // myofibril // inferred from direct assay /// 0030016 // myofibril // not recorded /// 0030017 // sarcomere // not recorded	0003779 // actin binding // not recorded /// 0005200 // structural constituent of cytoskeleton // not recorded /// 0005523 // tropomyosin binding // not recorded /// 0016887 // ATPase activity // not recorded /// 0030172 // troponin C binding // not recorded /// 0030674 // protein binding, bridging // inferred from direct assay /// 0031013 // troponin I binding // inferred from physical interacti…	Striated_muscle_contraction // GenMAPP
1367593_at	5.91535	5.45825	5.89123	5.70937	7.63933	7.82328	8.68157	8.11453	P	P	P	P	P	P	P	P	Rat Expression Array 230 2.0	Rattus norvegicus	2011-06-09	Consensus sequence	GenBank	Rn.37192.1	gb:NM_013027.1 /DB_XREF=gi:6981525 /GEN=Sepw1 /FEA=FLmRNA /CNT=54 /TID=Rn.37192.1 /TIER=FL+Stack /STK=47 /UG=Rn.37192 /LL=25545 /DEF=Rattus norvegicus Selenoprotein W muscle 1 (Sepw1), mRNA. /PROD=selenoprotein W muscle 1 /FL=gb:U25264.1 gb:NM_013027.1	NM_013027	Rn.37192	Rn.37192	November 2004 (Baylor College of Medicine HGSC Rnor3.4)	chr1:76249869-76254942 (-) // 92.57 // p31.1	selenoprotein W, 1	Sepw1	chr1q21	full length	ENSRNOG00000013548	25545	P63301	---	---	NP_037159	NM_013027	---	---	---	---	---	---	0010269 // response to selenium ion // inferred from expression pattern /// 0045454 // cell redox homeostasis // inferred from electronic annotation	0005737 // cytoplasm // inferred from electronic annotation	0008430 // selenium binding // inferred from electronic annotation	---
1367594_at	12.1221	12.0521	12.3107	12.3665	6.62405	7.03258	6.6051	6.51441	P	P	P	P	P	P	P	P	Rat Expression Array 230 2.0	Rattus norvegicus	2011-06-09	Consensus sequence	GenBank	Rn.783.1	gb:NM_017087.1 /DB_XREF=gi:8392982 /GEN=Bgn /FEA=FLmRNA /CNT=49 /TID=Rn.783.1 /TIER=FL+Stack /STK=47 /UG=Rn.783 /LL=25181 /DEF=Rattus norvegicus Small proteoglycan I (biglycan), bone (BSPG1) (bonecartilage proteclycan 1 precursor) (Bgn), mRNA. /PROD=small proteoglycan I (biglycan), bone (BSPG1)(bonecartilage proteclycan 1 precursor) /FL=gb:NM_017087.1 gb:U17834.1	NM_017087	Rn.783	Rn.783	November 2004 (Baylor College of Medicine HGSC Rnor3.4)	chrX:159380556-159393409 (+) // 89.82 //	biglycan	Bgn	chrXq37.2	full length	---	25181	P47853	---	---	NP_058783	NM_017087	---	---	---	---	---	---	0001974 // blood vessel remodeling // inferred from expression pattern /// 0019800 // peptide cross-linking via chondroitin 4-sulfate glycosaminoglycan // inferred from electronic annotation /// 0019800 // peptide cross-linking via chondroitin 4-sulfate glycosaminoglycan // not recorded	0005576 // extracellular region // inferred from electronic annotation /// 0005578 // proteinaceous extracellular matrix // inferred from electronic annotation /// 0009986 // cell surface // inferred from electronic annotation /// 0030133 // transport vesicle // inferred from electronic annotation /// 0030133 // transport vesicle // not recorded /// 0031012 // extracellular matrix // not recorded…	0005515 // protein binding // inferred from electronic annotation /// 0005539 // glycosaminoglycan binding // inferred from electronic annotation /// 0005539 // glycosaminoglycan binding // not recorded /// 0050840 // extracellular matrix binding // inferred from electronic annotation /// 0050840 // extracellular matrix binding // not recorded	---
1367595_s_at	12.9805	12.8649	12.9667	13.0605	12.5087	12.5851	12.5392	12.5951	P	P	P	P	P	P	P	P	Rat Expression Array 230 2.0	Rattus norvegicus	2011-06-09	Consensus sequence	GenBank	Rn.1868.1	gb:NM_012512.1 /DB_XREF=gi:7549745 /GEN=B2m /FEA=FLmRNA /CNT=72 /TID=Rn.1868.1 /TIER=FL+Stack /STK=46 /UG=Rn.1868 /LL=24223 /DEF=Rattus norvegicus Beta-2-microglobulin (B2m), mRNA. /PROD=beta-2-microglobulin /FL=gb:NM_012512.1	NM_012512	Rn.1868	Rn.1868	November 2004 (Baylor College of Medicine HGSC Rnor3.4)	chr3:108927914-108932809 (+) // 96.98 // q13.13	beta-2 microglobulin	B2m	chr3q35	full length	ENSRNOG00000017123	24223	P07151	---	---	NP_036644	NM_012512	---	---	---	---	---	---	0001916 // positive regulation of T cell mediated cytotoxicity // inferred from electronic annotation /// 0001916 // positive regulation of T cell mediated cytotoxicity // not recorded /// 0002237 // response to molecule of bacterial origin // inferred from electronic annotation /// 0002237 // response to molecule of bacterial origin // not recorded /// 0002474 // antigen processing and presentat…	0000139 // Golgi membrane // not recorded /// 0005576 // extracellular region // inferred from electronic annotation /// 0005615 // extracellular space // inferred from direct assay /// 0005886 // plasma membrane // not recorded /// 0009897 // external side of plasma membrane // inferred from electronic annotation /// 0009897 // external side of plasma membrane // not recorded /// 0031901 // earl…	0005515 // protein binding // inferred from electronic annotation /// 0005515 // protein binding // not recorded	---
1367596_at	14.1838	14.2237	14.0352	14.3146	13.5576	13.7773	13.5442	13.5834	P	P	P	P	P	P	P	P	Rat Expression Array 230 2.0	Rattus norvegicus	2011-06-09	Consensus sequence	GenBank	Rn.1059.1	gb:NM_013224.1 /DB_XREF=gi:6981487 /GEN=Rps26 /FEA=FLmRNA /CNT=67 /TID=Rn.1059.1 /TIER=FL+Stack /STK=46 /UG=Rn.1059 /LL=27139 /DEF=Rattus norvegicus ribosomal protein S26 (Rps26), mRNA. /PROD=ribosomal protein S26 /FL=gb:NM_013224.1	NM_013224	Rn.1059	Rn.135639	November 2004 (Baylor College of Medicine HGSC Rnor3.4)	chr3:13811176-13811712 (+) // 91.29 // p25.1 /// chr13:41082626-41083061 (-) // 93.9 // q14.11 /// chr18:12611047-12611498 (-) // 89.98 // p11.21 /// chr7:1919152-1920703 (-) // 94.77 // p22.3 /// chrX:34292123-34292558 (-) // 88.45 // p21.1	ribosomal protein S26	Rps26	chr7q11	full length	ENSRNOG00000005517 /// ENSRNOG00000029512	27139	D3Z8D7 /// P62856	---	---	NP_037356	NM_013224	---	---	---	---	---	---	0006412 // translation // inferred from electronic annotation /// 0006414 // translational elongation // not recorded /// 0033119 // negative regulation of RNA splicing // not recorded	0005622 // intracellular // inferred from electronic annotation /// 0005829 // cytosol // not recorded /// 0005840 // ribosome // inferred from electronic annotation /// 0015935 // small ribosomal subunit // not recorded /// 0022627 // cytosolic small ribosomal subunit // inferred from direct assay /// 0022627 // cytosolic small ribosomal subunit // not recorded /// 0030529 // ribonucleoprotein c…	0003729 // mRNA binding // not recorded /// 0003735 // structural constituent of ribosome // inferred from electronic annotation /// 0005515 // protein binding // not recorded	---
1367597_at	14.7947	14.7814	14.6885	14.8177	14.0576	14.2541	14.0411	14.1367	P	P	P	P	P	P	P	P	Rat Expression Array 230 2.0	Rattus norvegicus	2011-06-09	Consensus sequence	GenBank	Rn.3198.1	gb:NM_031706.1 /DB_XREF=gi:13928985 /GEN=Rps8 /FEA=FLmRNA /CNT=79 /TID=Rn.3198.1 /TIER=FL+Stack /STK=46 /UG=Rn.3198 /LL=65136 /DEF=Rattus norvegicus ribosomal protein S8 (Rps8), mRNA. /PROD=ribosomal protein S8 /FL=gb:NM_031706.1	NM_031706	Rn.3198	Rn.3198	November 2004 (Baylor College of Medicine HGSC Rnor3.4)	chr4:186838486-186839174 (+) // 88.33 // q35.1 /// chr12:16556417-16557110 (-) // 88.87 // p12.3 /// chr17:95246879-95247552 (-) // 89.28 // /// chr3:88116175-88116773 (-) // 77.48 // p11.1 /// chr5:137466707-137469290 (-) // 95.93 // q31.2 /// chr5:2504928-2505589 (-) // 87.25 // p15.33	ribosomal protein S8	Rps8	chr5q36	full length	ENSRNOG00000018768	65136	B2RYR8 /// P62243	---	---	NP_113894	NM_031706	---	---	---	---	---	---	0006412 // translation // inferred from electronic annotation /// 0006414 // translational elongation // not recorded	0005622 // intracellular // inferred from electronic annotation /// 0005737 // cytoplasm // inferred from electronic annotation /// 0005829 // cytosol // not recorded /// 0005840 // ribosome // inferred from electronic annotation /// 0022627 // cytosolic small ribosomal subunit // inferred from direct assay /// 0022627 // cytosolic small ribosomal subunit // not recorded /// 0030529 // ribonucleo…	0003735 // structural constituent of ribosome // inferred from electronic annotation /// 0005515 // protein binding // not recorded	---
1367598_at	2.48366	2.5415	2.24854	2.356	2.75574	2.7117	2.57279	2.51409	P	P	A	P	P	P	P	P	Rat Expression Array 230 2.0	Rattus norvegicus	2011-06-09	Consensus sequence	GenBank	Rn.1404.1	gb:NM_012681.1 /DB_XREF=gi:6981683 /GEN=Ttr /FEA=FLmRNA /CNT=56 /TID=Rn.1404.1 /TIER=FL+Stack /STK=46 /UG=Rn.1404 /LL=24856 /DEF=Rattus norvegicus Transthyretin (prealbumin, amyloidosis type I) (Ttr), mRNA. /PROD=transthyretin (prealbumin, amyloidosis type I) /FL=gb:NM_012681.1 gb:AF479660.1 gb:K03252.1	NM_012681	Rn.1404	Rn.1404	November 2004 (Baylor College of Medicine HGSC Rnor3.4)	chr18:12406550-12413680 (+) // 93.04 // p11.21	transthyretin	Ttr	chr18p	full length	ENSRNOG00000016275	24856	P02767	---	---	NP_036813	NM_012681	---	---	---	---	0	---	0006810 // transport // inferred from electronic annotation /// 0042403 // thyroid hormone metabolic process // traceable author statement	0005576 // extracellular region // inferred from electronic annotation /// 0005615 // extracellular space // inferred from direct assay	0005179 // hormone activity // inferred from electronic annotation /// 0005515 // protein binding // not recorded /// 0042562 // hormone binding // inferred from direct assay	---
1367599_at	12.2113	12.2363	12.3179	12.2761	12.2467	12.3129	12.2323	12.1629	P	P	P	P	P	P	P	P	Rat Expression Array 230 2.0	Rattus norvegicus	2011-06-09	Consensus sequence	GenBank	Rn.3357.1	gb:NM_017311.1 /DB_XREF=gi:8392938 /GEN=Atp5g1 /FEA=FLmRNA /CNT=53 /TID=Rn.3357.1 /TIER=FL+Stack /STK=46 /UG=Rn.3357 /LL=29754 /DEF=Rattus norvegicus ATP synthase, H+ transporting, mitochondrial F0 complex, subunit c (subunit 9), isoform 1 (Atp5g1), mRNA. /PROD=ATP synthase, H+ transporting, mitochondrial F0complex, subunit c (subunit 9), isoform 1 /FL=gb:NM_017311.1 gb:D13123.1	NM_017311	Rn.3357	Rn.3357	November 2004 (Baylor College of Medicine HGSC Rnor3.4)	chr10:84788646-84790678 (-) // 90.66 // q23.1	ATP synthase, H+ transporting, mitochondrial F0 complex, subunit C1 (subunit 9)	Atp5g1	chr10q31	full length	ENSRNOG00000007235 /// ENSRNOG00000021123	29754	D3ZSA8 /// Q06645	---	---	NP_059007	NM_017311	---	---	---	---	---	---	0006810 // transport // inferred from electronic annotation /// 0006811 // ion transport // inferred from electronic annotation /// 0015986 // ATP synthesis coupled proton transport // inferred from electronic annotation /// 0015992 // proton transport // inferred from electronic annotation /// 0045471 // response to ethanol // inferred from expression pattern /// 0046034 // ATP metabolic process…	0000276 // mitochondrial proton-transporting ATP synthase complex, coupling factor F(o) // inferred from direct assay /// 0005739 // mitochondrion // not recorded /// 0005739 // mitochondrion // non-traceable author statement /// 0005739 // mitochondrion // inferred from electronic annotation /// 0005743 // mitochondrial inner membrane // not recorded /// 0016020 // membrane // inferred from elec…	0008289 // lipid binding // inferred from electronic annotation /// 0015078 // hydrogen ion transmembrane transporter activity // inferred from electronic annotation /// 0046933 // hydrogen ion transporting ATP synthase activity, rotational mechanism // inferred from electronic annotation	Electron_Transport_Chain // GenMAPP
1367600_at	3.51396	3.6166	3.56739	3.50739	3.58042	3.5544	3.31912	3.36135	P	P	P	P	P	P	P	P	Rat Expression Array 230 2.0	Rattus norvegicus	2011-06-09	Consensus sequence	GenBank	Rn.1657.1	gb:NM_022531.1 /DB_XREF=gi:11968117 /GEN=Des /FEA=FLmRNA /CNT=54 /TID=Rn.1657.1 /TIER=FL+Stack /STK=46 /UG=Rn.1657 /LL=64362 /DEF=Rattus norvegicus desmin (Des), mRNA. /PROD=desmin /FL=gb:NM_022531.1	NM_022531	Rn.1657	Rn.39196	November 2004 (Baylor College of Medicine HGSC Rnor3.4)	chr9:74637666-74645499 (+) // 98.92 // q21.13	desmin	Des	chr9q33	full length	ENSRNOG00000019810	64362	P48675 /// Q6P725	---	---	NP_071976	NM_022531	---	---	---	---	---	---	---	0005622 // intracellular // inferred from electronic annotation /// 0005622 // intracellular // not recorded /// 0005626 // insoluble fraction // inferred from electronic annotation /// 0005626 // insoluble fraction // not recorded /// 0005737 // cytoplasm // inferred from electronic annotation /// 0005856 // cytoskeleton // inferred from electronic annotation /// 0005856 // cytoskeleton // not r…	0005198 // structural molecule activity // inferred from electronic annotation /// 0005515 // protein binding // inferred from electronic annotation /// 0005515 // protein binding // not recorded	Striated_muscle_contraction // GenMAPP
1367601_at	10.5653	10.5808	10.4436	10.2669	10.201	10.5089	10.4308	10.7896	P	P	P	P	P	P	P	P	Rat Expression Array 230 2.0	Rattus norvegicus	2011-06-09	Consensus sequence	GenBank	Rn.31765.1	gb:NM_053698.1 /DB_XREF=gi:16758511 /GEN=Cited2 /FEA=FLmRNA /CNT=108 /TID=Rn.31765.1 /TIER=FL+Stack /STK=45 /UG=Rn.31765 /LL=114490 /DEF=Rattus norvegicus Cbpp300-interacting transactivator, with GluAsp-rich carboxy-terminal domain, 2 (Cited2), mRNA. /PROD=Cbpp300-interacting transactivator, withGluAsp-rich carboxy-terminal domain, 2 /FL=gb:NM_053698.1 gb:AF361476.1	NM_053698	Rn.31765	Rn.31765	November 2004 (Baylor College of Medicine HGSC Rnor3.4)	chr1:12721501-12723943 (+) // 91.8 // p36.21	Cbp/p300-interacting transactivator, with Glu/Asp-rich carboxy-terminal domain, 2	Cited2	chr1p12	full length	ENSRNOG00000012193	114490	Q99MA1	---	---	NP_446150	NM_053698	---	---	---	---	---	---	0000122 // negative regulation of transcription from RNA polymerase II promoter // inferred from electronic annotation /// 0000122 // negative regulation of transcription from RNA polymerase II promoter // not recorded /// 0001568 // blood vessel development // not recorded /// 0001570 // vasculogenesis // not recorded /// 0001666 // response to hypoxia // inferred from electronic annotation /// …	0000790 // nuclear chromatin // inferred from electronic annotation /// 0005634 // nucleus // not recorded /// 0005634 // nucleus // inferred from sequence or structural similarity /// 0005634 // nucleus // inferred from electronic annotation /// 0005737 // cytoplasm // inferred from electronic annotation /// 0005737 // cytoplasm // not recorded	0003700 // sequence-specific DNA binding transcription factor activity // inferred from sequence or structural similarity /// 0003700 // sequence-specific DNA binding transcription factor activity // inferred from electronic annotation /// 0003713 // transcription coactivator activity // not recorded /// 0003713 // transcription coactivator activity // inferred from sequence or structural similar…	---
1367602_at	11.2188	11.064	10.9377	11.0646	11.1753	11.4035	11.2625	11.2877	P	P	P	P	P	P	P	P	Rat Expression Array 230 2.0	Rattus norvegicus	2011-06-09	Consensus sequence	GenBank	Rn.31765.1	gb:AI013390 /DB_XREF=gi:4133847 /DB_XREF=EST208065 /CLONE=RSPBK38 /FEA=FLmRNA /CNT=108 /TID=Rn.31765.1 /TIER=Stack /STK=28 /UG=Rn.31765 /LL=114490 /UG_GENE=Cited2 /UG_TITLE=Cbpp300-interacting transactivator, with GluAsp-rich carboxy-terminal domain, 2 /FL=gb:NM_053698.1 gb:AF361476.1	AI013390	Rn.31765	Rn.31765	November 2004 (Baylor College of Medicine HGSC Rnor3.4)	chr1:12721501-12723943 (+) // 91.8 // p36.21	Cbp/p300-interacting transactivator, with Glu/Asp-rich carboxy-terminal domain, 2	Cited2	chr1p12	full length	ENSRNOG00000012193	114490	Q99MA1	---	---	NP_446150	NM_053698	---	---	---	---	---	---	0000122 // negative regulation of transcription from RNA polymerase II promoter // inferred from electronic annotation /// 0000122 // negative regulation of transcription from RNA polymerase II promoter // not recorded /// 0001568 // blood vessel development // not recorded /// 0001570 // vasculogenesis // not recorded /// 0001666 // response to hypoxia // inferred from electronic annotation /// …	0000790 // nuclear chromatin // inferred from electronic annotation /// 0005634 // nucleus // not recorded /// 0005634 // nucleus // inferred from sequence or structural similarity /// 0005634 // nucleus // inferred from electronic annotation /// 0005737 // cytoplasm // inferred from electronic annotation /// 0005737 // cytoplasm // not recorded	0003700 // sequence-specific DNA binding transcription factor activity // inferred from sequence or structural similarity /// 0003700 // sequence-specific DNA binding transcription factor activity // inferred from electronic annotation /// 0003713 // transcription coactivator activity // not recorded /// 0003713 // transcription coactivator activity // inferred from sequence or structural similar…	---
1367603_at	12.461	12.3577	12.4555	12.6243	13.2937	13.4859	13.3382	13.3203	P	P	P	P	P	P	P	P	Rat Expression Array 230 2.0	Rattus norvegicus	2011-06-09	Consensus sequence	GenBank	Rn.37838.1	gb:NM_022922.1 /DB_XREF=gi:12621073 /GEN=Tpi1 /FEA=FLmRNA /CNT=69 /TID=Rn.37838.1 /TIER=FL+Stack /STK=45 /UG=Rn.37838 /LL=24849 /DEF=Rattus norvegicus Triosephosphate isomerase 1 (Tpi1), mRNA. /PROD=triosephosphate isomerase 1 /FL=gb:L36250.1 gb:NM_022922.1	NM_022922	Rn.37838	Rn.144555	November 2004 (Baylor College of Medicine HGSC Rnor3.4)	chr17:33351558-33352926 (-) // 90.09 // q12 /// chr4:160933353-160936878 (-) // 96.88 // q32.1 /// chr8:24851927-24853365 (-) // 94.37 // p21.2	triosephosphate isomerase 1	Tpi1	chr4q42	full length	ENSRNOG00000015290	24849	P48500 /// Q6SA19	EC:5.3.1.1	---	NP_075211	NM_022922	---	---	---	---	---	---	0005975 // carbohydrate metabolic process // inferred from direct assay /// 0006006 // glucose metabolic process // not recorded /// 0006006 // glucose metabolic process // inferred from electronic annotation /// 0006094 // gluconeogenesis // inferred from electronic annotation /// 0006096 // glycolysis // traceable author statement /// 0006096 // glycolysis // inferred from electronic annotation…	0005625 // soluble fraction // inferred from direct assay /// 0005634 // nucleus // inferred from direct assay /// 0005829 // cytosol // inferred from direct assay	0003824 // catalytic activity // inferred from electronic annotation /// 0004807 // triose-phosphate isomerase activity // inferred from direct assay /// 0004807 // triose-phosphate isomerase activity // not recorded /// 0004807 // triose-phosphate isomerase activity // inferred from electronic annotation /// 0005515 // protein binding // inferred from direct assay /// 0016853 // isomerase activi…	Fatty_Acid_Degradation // GenMAPP /// Glycolysis_and_Gluconeogenesis // GenMAPP
1367604_at	11.0601	10.9325	11.0894	11.2389	11.6797	11.8627	11.9097	11.8967	P	P	P	P	P	P	P	P	Rat Expression Array 230 2.0	Rattus norvegicus	2011-06-09	Consensus sequence	GenBank	Rn.4267.1	gb:NM_022501.1 /DB_XREF=gi:11968067 /GEN=Csrp2 /FEA=FLmRNA /CNT=51 /TID=Rn.4267.1 /TIER=FL+Stack /STK=45 /UG=Rn.4267 /LL=29317 /DEF=Rattus norvegicus cysteine-rich protein 2 (Csrp2), mRNA. /PROD=cysteine-rich protein 2 /FL=gb:D17512.1 gb:NM_022501.1	NM_022501	Rn.4267	Rn.4267	November 2004 (Baylor College of Medicine HGSC Rnor3.4)	chr6:138147461-138152411 (+) // 99.05 // q23.3 /// chr7:139656879-139658000 (-) // 90.85 // q34	cysteine-rich protein 2	Crip2	chr6q32	full length	ENSRNOG00000005041	338401	P36201	---	---	NP_071946	NM_022501	---	---	---	---	---	---	0008284 // positive regulation of cell proliferation // not recorded /// 0030097 // hemopoiesis // not recorded	0031012 // extracellular matrix // not recorded	0008270 // zinc ion binding // inferred from electronic annotation /// 0046872 // metal ion binding // inferred from electronic annotation	---
1367605_at	13.0423	12.9131	12.9941	12.9759	13.0174	13.2416	13.3043	13.156	P	P	P	P	P	P	P	P	Rat Expression Array 230 2.0	Rattus norvegicus	2011-06-09	Consensus sequence	GenBank	Rn.1152.1	gb:NM_022511.1 /DB_XREF=gi:11968087 /GEN=Pfn1 /FEA=FLmRNA /CNT=68 /TID=Rn.1152.1 /TIER=FL+Stack /STK=44 /UG=Rn.1152 /LL=64303 /DEF=Rattus norvegicus profilin (Pfn1), mRNA. /PROD=profilin /FL=gb:NM_022511.1	NM_022511	Rn.1152	Rn.1152	November 2004 (Baylor College of Medicine HGSC Rnor3.4)	chr10:57531661-57534249 (-) // 90.63 // q21.1	profilin 1	Pfn1	chr10q24	full length	ENSRNOG00000003975	64303	P62963	---	---	NP_071956	NM_022511	---	---	---	---	---	---	0001843 // neural tube closure // not recorded /// 0006357 // regulation of transcription from RNA polymerase II promoter // not recorded /// 0007010 // cytoskeleton organization // inferred from electronic annotation /// 0008154 // actin polymerization or depolymerization // traceable author statement /// 0010033 // response to organic substance // inferred from expression pattern /// 0030036 //…	0005576 // extracellular region // not recorded /// 0005634 // nucleus // not recorded /// 0005737 // cytoplasm // inferred from direct assay /// 0005737 // cytoplasm // not recorded /// 0005737 // cytoplasm // traceable author statement /// 0005737 // cytoplasm // inferred from electronic annotation /// 0005829 // cytosol // not recorded /// 0005856 // cytoskeleton // inferred from electronic an…	0003779 // actin binding // not recorded /// 0003779 // actin binding // traceable author statement /// 0003779 // actin binding // inferred from electronic annotation /// 0005102 // receptor binding // inferred from direct assay /// 0005515 // protein binding // inferred from physical interaction /// 0005515 // protein binding // not recorded /// 0005546 // phosphatidylinositol-4,5-bisphosphate …	---
1367606_at	14.9256	14.9055	14.794	14.9423	14.1408	14.3512	14.109	14.2101	P	P	P	P	P	P	P	P	Rat Expression Array 230 2.0	Rattus norvegicus	2011-06-09	Consensus sequence	GenBank	Rn.11232.1	gb:NM_017153.1 /DB_XREF=gi:8394220 /GEN=Rps3a /FEA=FLmRNA /CNT=70 /TID=Rn.11232.1 /TIER=FL+Stack /STK=44 /UG=Rn.11232 /LL=29288 /DEF=Rattus norvegicus ribosomal protein S3a (Rps3a), mRNA. /PROD=ribosomal protein S3a /FL=gb:M84716.1 gb:NM_017153.1	NM_017153	Rn.11232	Rn.94935	November 2004 (Baylor College of Medicine HGSC Rnor3.4)	chr2:178092164-178096721 (-) // 97.73 // q31.2	ribosomal protein S3a	Rps3a	chr2q34	full length	ENSRNOG00000011893	29288	P49242	---	---	NP_058849	NM_017153	---	---	---	---	---	---	0006412 // translation // not recorded /// 0006412 // translation // inferred from sequence or structural similarity /// 0006412 // translation // inferred from electronic annotation /// 0006414 // translational elongation // not recorded /// 0006917 // induction of apoptosis // not recorded /// 0006917 // induction of apoptosis // inferred from sequence or structural similarity /// 0030154 // ce…	0005622 // intracellular // inferred from electronic annotation /// 0005634 // nucleus // not recorded /// 0005634 // nucleus // inferred from sequence or structural similarity /// 0005634 // nucleus // inferred from electronic annotation /// 0005730 // nucleolus // not recorded /// 0005737 // cytoplasm // inferred from electronic annotation /// 0005737 // cytoplasm // not recorded /// 0005829 //…	0003735 // structural constituent of ribosome // inferred from electronic annotation /// 0005515 // protein binding // not recorded	Ribosomal_Proteins // GenMAPP
1367607_at	12.4553	12.4791	12.6698	12.6026	12.112	12.2732	12.225	12.1955	P	P	P	P	P	P	P	P	Rat Expression Array 230 2.0	Rattus norvegicus	2011-06-09	Consensus sequence	GenBank	Rn.2528.1	gb:NM_017202.1 /DB_XREF=gi:8393179 /GEN=Cox4a /FEA=FLmRNA /CNT=68 /TID=Rn.2528.1 /TIER=FL+Stack /STK=43 /UG=Rn.2528 /LL=29445 /DEF=Rattus norvegicus cytochrome c oxidase, subunit IVa (Cox4a), mRNA. /PROD=cytochrome c oxidase, subunit IVa /FL=gb:NM_017202.1	NM_017202	Rn.2528	Rn.2528	November 2004 (Baylor College of Medicine HGSC Rnor3.4)	chr19:51023959-51030202 (+) // 92.15 // q13.33	cytochrome c oxidase subunit IV isoform 1	Cox4i1	chr19q12	full length	ENSRNOG00000017817	29445	P10888	EC:1.9.3.1	---	NP_058898	NM_017202	---	---	---	---	---	---	0007584 // response to nutrient // inferred from expression pattern	0005634 // nucleus // inferred from electronic annotation /// 0005634 // nucleus // not recorded /// 0005739 // mitochondrion // inferred from electronic annotation /// 0005739 // mitochondrion // not recorded /// 0005743 // mitochondrial inner membrane // inferred from electronic annotation /// 0005743 // mitochondrial inner membrane // not recorded /// 0016020 // membrane // inferred from elect…	0004129 // cytochrome-c oxidase activity // inferred from electronic annotation /// 0005515 // protein binding // inferred from electronic annotation /// 0005515 // protein binding // not recorded	Electron_Transport_Chain // GenMAPP
1367608_at	2.24006	2.27762	2.13013	2.16323	2.32556	2.47413	2.38685	2.41403	A	A	A	A	A	A	A	A	Rat Expression Array 230 2.0	Rattus norvegicus	2011-06-09	Consensus sequence	GenBank	Rn.10802.1	gb:NM_031689.1 /DB_XREF=gi:13928955 /GEN=Cryba4 /FEA=FLmRNA /CNT=45 /TID=Rn.10802.1 /TIER=FL+Stack /STK=43 /UG=Rn.10802 /LL=64348 /DEF=Rattus norvegicus crystallin, beta A4 (Cryba4), mRNA. /PROD=crystallin, beta A4 /FL=gb:AF013247.1 gb:NM_031689.1	NM_031689	Rn.10802	Rn.10802	November 2004 (Baylor College of Medicine HGSC Rnor3.4)	---	crystallin, beta A4	Cryba4	---	full length	---	64348	P56374	---	---	NP_113877	NM_031689	---	---	---	---	---	---	0007601 // visual perception // not recorded /// 0043010 // camera-type eye development // not recorded	0005625 // soluble fraction // not recorded	0005212 // structural constituent of eye lens // inferred from direct assay /// 0005212 // structural constituent of eye lens // inferred from electronic annotation	---
1367609_at	12.1485	11.9914	12.1832	12.2118	13.2453	13.4459	13.2619	13.3046	P	P	P	P	P	P	P	P	Rat Expression Array 230 2.0	Rattus norvegicus	2011-06-09	Consensus sequence	GenBank	Rn.2661.1	gb:NM_031051.1 /DB_XREF=gi:13591984 /GEN=Mif /FEA=FLmRNA /CNT=58 /TID=Rn.2661.1 /TIER=FL+Stack /STK=41 /UG=Rn.2661 /LL=81683 /DEF=Rattus norvegicus macrophage migration inhibitory factor (Mif), mRNA. /PROD=macrophage migration inhibitory factor /FL=gb:NM_031051.1 gb:U62326.1 gb:U20999.1	NM_031051	Rn.2661	Rn.2661	November 2004 (Baylor College of Medicine HGSC Rnor3.4)	chr20:13191976-13192850 (+) // 95.73 // p12.1 /// chr1:77084827-77085388 (-) // 91.79 // p31.1 /// chr5:156990635-156991174 (-) // 89.4 // q33.3 /// chr10:98593339-98593889 (-) // 85.98 // q24.1	macrophage migration inhibitory factor	Mif	chr20p12	full length	ENSRNOG00000006589	81683	P30904	EC:5.3.2.1 /// EC:5.3.3.12	---	NP_112313	NM_031051	---	---	---	---	---	---	0001516 // prostaglandin biosynthetic process // not recorded /// 0001942 // hair follicle development // inferred from expression pattern /// 0002035 // brain renin-angiotensin system // inferred from mutant phenotype /// 0002675 // positive regulation of acute inflammatory response // inferred from mutant phenotype /// 0006954 // inflammatory response // inferred from electronic annotation /// …	0005576 // extracellular region // inferred from electronic annotation /// 0005576 // extracellular region // not recorded /// 0005615 // extracellular space // inferred from direct assay /// 0005615 // extracellular space // inferred from electronic annotation /// 0005634 // nucleus // inferred from direct assay /// 0005737 // cytoplasm // inferred from direct assay /// 0005737 // cytoplasm // i…	0004167 // dopachrome isomerase activity // not recorded /// 0004167 // dopachrome isomerase activity // inferred from sequence or structural similarity /// 0004167 // dopachrome isomerase activity // inferred from electronic annotation /// 0005102 // receptor binding // not recorded /// 0005125 // cytokine activity // inferred from electronic annotation /// 0005125 // cytokine activity // not re…	---
1367610_at	14.5426	14.4872	14.4535	14.5719	13.7631	14.0164	13.7703	13.8133	P	P	P	P	P	P	P	P	Rat Expression Array 230 2.0	Rattus norvegicus	2011-06-09	Consensus sequence	GenBank	Rn.3384.1	gb:NM_031103.1 /DB_XREF=gi:14389296 /GEN=Rpl19 /FEA=FLmRNA /CNT=68 /TID=Rn.3384.1 /TIER=FL+Stack /STK=40 /UG=Rn.3384 /LL=81767 /DEF=Rattus norvegicus ribosomal protein L19 (Rpl19), mRNA. /PROD=ribosomal protein L19 /FL=gb:NM_031103.1 gb:J02650.1	NM_031103	Rn.3384	Rn.3384	November 2004 (Baylor College of Medicine HGSC Rnor3.4)	chr1:95151187-95151886 (+) // 93.33 // p21.3 /// chr10:86788837-86792125 (+) // 97.5 // q23.1 /// chr14:110440206-110440906 (+) // 93.19 // /// chr2:211322019-211322720 (+) // 93.61 // q34 /// chr4:56694976-56695685 (+) // 91.25 // q12 /// chr3:96204404-96205117 (-) // 90.56 // q11.2 /// chrX:141253470-141254175 (-) // 91.39 // q27.2	ribosomal protein L19	Rpl19	chr10q31	full length	ENSRNOG00000004741	81767	P84100 /// Q63287	---	---	NP_112365	NM_031103	---	---	---	---	---	---	0006412 // translation // inferred from electronic annotation /// 0006414 // translational elongation // not recorded	0005622 // intracellular // inferred from electronic annotation /// 0005829 // cytosol // not recorded /// 0005840 // ribosome // inferred from electronic annotation /// 0022625 // cytosolic large ribosomal subunit // not recorded /// 0030529 // ribonucleoprotein complex // inferred from electronic annotation	0003735 // structural constituent of ribosome // inferred from electronic annotation /// 0003735 // structural constituent of ribosome // not recorded	---
1367611_at	2.62892	2.69969	2.98994	2.89391	3.37519	3.18111	3.26826	3.1638	P	A	M	M	P	P	P	M	Rat Expression Array 230 2.0	Rattus norvegicus	2011-06-09	Consensus sequence	GenBank	Rn.5950.1	gb:BG667093 /DB_XREF=gi:13889015 /DB_XREF=DRACFB11 /CLONE=DRACFB11 /FEA=FLmRNA /CNT=59 /TID=Rn.5950.1 /TIER=ConsEnd /STK=0 /UG=Rn.5950 /LL=64524 /UG_GENE=Tkt /UG_TITLE=transketolase /FL=gb:NM_022592.1 gb:U09256.1	BG667093	Rn.5950	Rn.5950	November 2004 (Baylor College of Medicine HGSC Rnor3.4)	chr16:5909452-5934354 (+) // 96.66 // p13.3	transketolase	Tkt	chr16p16	full length	ENSRNOG00000016064	64524	P50137	EC:2.2.1.1	---	NP_072114	NM_022592	---	---	---	---	---	---	0006098 // pentose-phosphate shunt // inferred from direct assay /// 0008152 // metabolic process // not recorded /// 0008152 // metabolic process // inferred from electronic annotation /// 0009052 // pentose-phosphate shunt, non-oxidative branch // inferred from direct assay /// 0040008 // regulation of growth // inferred from electronic annotation /// 0040008 // regulation of growth // not reco…	0005625 // soluble fraction // inferred from direct assay /// 0005777 // peroxisome // inferred from direct assay /// 0005789 // endoplasmic reticulum membrane // inferred from direct assay /// 0005792 // microsome // inferred from direct assay /// 0005829 // cytosol // not recorded	0000287 // magnesium ion binding // inferred from direct assay /// 0003824 // catalytic activity // inferred from electronic annotation /// 0004802 // transketolase activity // inferred from direct assay /// 0004802 // transketolase activity // not recorded /// 0004802 // transketolase activity // inferred from electronic annotation /// 0005515 // protein binding // not recorded /// 0005529 // su…	Pentose_Phosphate_Pathway // GenMAPP
1367612_at	12.7202	12.843	12.9839	12.6996	13.0374	13.0297	13.0003	12.9697	P	P	P	P	P	P	P	P	Rat Expression Array 230 2.0	Rattus norvegicus	2011-06-09	Consensus sequence	GenBank	Rn.2580.1	gb:NM_134349.1 /DB_XREF=gi:19705452 /GEN=Mgst1 /FEA=FLmRNA /CNT=56 /TID=Rn.2580.1 /TIER=FL+Stack /STK=40 /UG=Rn.2580 /LL=171341 /DEF=Rattus norvegicus microsomal glutathione S-transferase 1 (Mgst1), mRNA. /PROD=microsomal glutathione S-transferase 1 /FL=gb:J03752.1 gb:NM_134349.1	NM_134349	Rn.2580	Rn.2580	November 2004 (Baylor College of Medicine HGSC Rnor3.4)	chr4:175254879-175263881 (+) // 97.3 // q34.1	microsomal glutathione S-transferase 1	Mgst1	chr4q44	full length	ENSRNOG00000007743	171341	B6DYQ4 /// P08011	EC:2.5.1.18	---	NP_599176	NM_134349	---	---	---	---	---	---	0006749 // glutathione metabolic process // inferred from electronic annotation /// 0006749 // glutathione metabolic process // not recorded /// 0010243 // response to organic nitrogen // inferred from direct assay /// 0032496 // response to lipopolysaccharide // inferred from direct assay /// 0033327 // Leydig cell differentiation // inferred from expression pattern /// 0042493 // response to dr…	0005634 // nucleus // inferred from direct assay /// 0005739 // mitochondrion // inferred from direct assay /// 0005739 // mitochondrion // not recorded /// 0005739 // mitochondrion // inferred from electronic annotation /// 0005741 // mitochondrial outer membrane // inferred from electronic annotation /// 0005743 // mitochondrial inner membrane // inferred from electronic annotation /// 0005743 …	0004364 // glutathione transferase activity // inferred from direct assay /// 0004364 // glutathione transferase activity // not recorded /// 0004364 // glutathione transferase activity // inferred from electronic annotation /// 0005515 // protein binding // not recorded /// 0016740 // transferase activity // inferred from electronic annotation /// 0042802 // identical protein binding // inferred…	Oxidative_Stress // GenMAPP
1367613_at	13.3703	13.382	13.3479	13.356	13.0601	13.2234	13.0679	13.1371	P	P	P	P	P	P	P	P	Rat Expression Array 230 2.0	Rattus norvegicus	2011-06-09	Consensus sequence	GenBank	Rn.2845.1	gb:NM_057114.1 /DB_XREF=gi:16923957 /GEN=Prdx1 /FEA=FLmRNA /CNT=66 /TID=Rn.2845.1 /TIER=FL+Stack /STK=38 /UG=Rn.2845 /LL=117254 /DEF=Rattus norvegicus peroxiredoxin 1 (Prdx1), mRNA. /PROD=peroxiredoxin 1 /FL=gb:D30035.1 gb:NM_057114.1	NM_057114	Rn.2845	Rn.2845	November 2004 (Baylor College of Medicine HGSC Rnor3.4)	chr2:201373363-201374286 (+) // 94.61 // q33.1 /// chr2:25706678-25707484 (+) // 85.04 // p23.3 /// chr5:136975776-136991634 (+) // 97.91 // q31.2 /// chr6:48332492-48333392 (+) // 90.32 // p12.3 /// chr6:124366158-124367301 (-) // 91.97 // q22.31	peroxiredoxin 1	Prdx1	chr5q36	full length	ENSRNOG00000017194	117254	Q63716	EC:1.11.1.15	---	NP_476455	NM_057114	---	---	---	---	---	---	0000302 // response to reactive oxygen species // not recorded /// 0006979 // response to oxidative stress // inferred from direct assay /// 0006979 // response to oxidative stress // not recorded /// 0008283 // cell proliferation // not recorded /// 0019430 // removal of superoxide radicals // not recorded /// 0032872 // regulation of stress-activated MAPK cascade // not recorded /// 0034101 // …	0005634 // nucleus // not recorded /// 0005719 // nuclear euchromatin // inferred from direct assay /// 0005730 // nucleolus // inferred from direct assay /// 0005737 // cytoplasm // inferred from direct assay /// 0005737 // cytoplasm // not recorded /// 0005737 // cytoplasm // inferred from electronic annotation /// 0005739 // mitochondrion // not recorded /// 0005759 // mitochondrial matrix // …	0004601 // peroxidase activity // inferred from electronic annotation /// 0004601 // peroxidase activity // not recorded /// 0005515 // protein binding // not recorded /// 0008379 // thioredoxin peroxidase activity // not recorded /// 0016209 // antioxidant activity // inferred from electronic annotation /// 0016491 // oxidoreductase activity // inferred from electronic annotation /// 0020037 // …	---
1367614_at	14.4155	14.466	14.484	14.5326	13.0716	12.9738	12.8952	12.9007	P	P	P	P	P	P	P	P	Rat Expression Array 230 2.0	Rattus norvegicus	2011-06-09	Consensus sequence	GenBank	Rn.1792.1	gb:NM_012904.1 /DB_XREF=gi:6978500 /GEN=Anxa1 /FEA=FLmRNA /CNT=58 /TID=Rn.1792.1 /TIER=FL+Stack /STK=38 /UG=Rn.1792 /LL=25380 /DEF=Rattus norvegicus Annexin 1 (p35) (Lipocortin 1) (Anxa1), mRNA. /PROD=annexin 1 (p35) (Lipocortin 1) /FL=gb:M19967.1 gb:NM_012904.1	NM_012904	Rn.1792	Rn.1792	November 2004 (Baylor College of Medicine HGSC Rnor3.4)	chr1:223478107-223494454 (-) // 89.94 // q41	annexin A1	Anxa1	chr1q51	full length	ENSRNOG00000017469	25380	D3ZVZ4 /// P07150	---	---	NP_037036	NM_012904	---	---	---	---	---	---	0002674 // negative regulation of acute inflammatory response // inferred from direct assay /// 0007049 // cell cycle // not recorded /// 0007165 // signal transduction // not recorded /// 0007166 // cell surface receptor linked signaling pathway // inferred from direct assay /// 0009725 // response to hormone stimulus // inferred from expression pattern /// 0010165 // response to X-ray // inferr…	0001533 // cornified envelope // not recorded /// 0005576 // extracellular region // not recorded /// 0005615 // extracellular space // inferred from direct assay /// 0005634 // nucleus // inferred from direct assay /// 0005634 // nucleus // inferred from electronic annotation /// 0005737 // cytoplasm // inferred from direct assay /// 0005737 // cytoplasm // not recorded /// 0005737 // cytoplasm …	0003697 // single-stranded DNA binding // inferred from direct assay /// 0003727 // single-stranded RNA binding // inferred from direct assay /// 0004859 // phospholipase inhibitor activity // inferred from electronic annotation /// 0005198 // structural molecule activity // not recorded /// 0005509 // calcium ion binding // inferred from electronic annotation /// 0005515 // protein binding // in…	Prostaglandin_synthesis_regulation // GenMAPP
1367615_at	2.51711	2.53771	2.40727	2.58115	2.59426	2.46268	2.54434	2.54337	A	A	A	A	A	A	A	A	Rat Expression Array 230 2.0	Rattus norvegicus	2011-06-09	Consensus sequence	GenBank	Rn.9941.1	gb:NM_133516.1 /DB_XREF=gi:19424157 /GEN=Svs5 /FEA=FLmRNA /CNT=41 /TID=Rn.9941.1 /TIER=FL+Stack /STK=38 /UG=Rn.9941 /LL=171027 /DEF=Rattus norvegicus seminal vesicle secretion 5 (Svs5), mRNA. /PROD=seminal vesicle secretion 5 /FL=gb:NM_133516.1	NM_133516	Rn.9941	Rn.9941	November 2004 (Baylor College of Medicine HGSC Rnor3.4)	chr3:155265148-155266753 (+) // 95.98 // q25.31	seminal vesicle secretory protein 5	Svs5	chr3q42	full length	ENSRNOG00000013834	171027	D3ZJA4 /// P04812 /// Q9QZV2	---	---	NP_598200	NM_133516	---	---	---	---	---	---	---	0005576 // extracellular region // inferred from electronic annotation /// 0005615 // extracellular space // inferred from electronic annotation	---	---
1367616_at	6.08509	6.27585	5.82747	6.27609	11.7199	11.4633	11.7751	11.7593	P	P	P	P	P	P	P	P	Rat Expression Array 230 2.0	Rattus norvegicus	2011-06-09	Consensus sequence	GenBank	Rn.3835.1	gb:NM_031545.1 /DB_XREF=gi:13928737 /GEN=Nppb /FEA=FLmRNA /CNT=43 /TID=Rn.3835.1 /TIER=FL+Stack /STK=38 /UG=Rn.3835 /LL=25105 /DEF=Rattus norvegicus Brain natriuretic factor (Nppb), mRNA. /PROD=brain natriuretic factor /FL=gb:M25297.1 gb:NM_031545.1	NM_031545	Rn.3835	Rn.3835	November 2004 (Baylor College of Medicine HGSC Rnor3.4)	chr5:165062289-165063657 (+) // 91.21 // q34	natriuretic peptide precursor B	Nppb	chr5q36	full length	ENSRNOG00000008141	25105	P13205	---	---	NP_113733	NM_031545	---	---	---	---	---	---	0001666 // response to hypoxia // inferred from expression pattern /// 0006182 // cGMP biosynthetic process // inferred from direct assay /// 0006182 // cGMP biosynthetic process // not recorded /// 0006954 // inflammatory response // inferred from expression pattern /// 0007168 // receptor guanylyl cyclase signaling pathway // not recorded /// 0007168 // receptor guanylyl cyclase signaling pathw…	0005576 // extracellular region // inferred from electronic annotation /// 0005615 // extracellular space // inferred from direct assay /// 0005634 // nucleus // inferred from direct assay /// 0005737 // cytoplasm // inferred from direct assay /// 0048471 // perinuclear region of cytoplasm // inferred from direct assay	0005102 // receptor binding // not recorded /// 0005179 // hormone activity // inferred from direct assay /// 0005179 // hormone activity // inferred from electronic annotation /// 0051428 // peptide hormone receptor binding // inferred from direct assay	---
1367617_at	12.4461	12.5543	12.6043	12.6112	12.5289	12.756	12.6435	12.6218	P	P	P	P	P	P	P	P	Rat Expression Array 230 2.0	Rattus norvegicus	2011-06-09	Consensus sequence	GenBank	Rn.1774.1	gb:NM_012495.1 /DB_XREF=gi:6978486 /GEN=Aldoa /FEA=FLmRNA /CNT=58 /TID=Rn.1774.1 /TIER=FL+Stack /STK=37 /UG=Rn.1774 /LL=24189 /DEF=Rattus norvegicus Aldolase A, fructose-bisphosphate (Aldoa), mRNA. /PROD=aldolase A, fructose-bisphosphate /FL=gb:M14420.1 gb:M12919.1 gb:NM_012495.1	NM_012495	Rn.1774	Rn.1774	November 2004 (Baylor College of Medicine HGSC Rnor3.4)	chr18:30199940-30201370 (+) // 95.22 // q12.1 /// chr1:185970657-185974615 (-) // 98.56 // q31.1	aldolase A, fructose-bisphosphate	Aldoa	chr1q36	full length	ENSRNOG00000023647	24189	P05065	EC:4.1.2.13	---	NP_001170776 /// NP_036627	NM_001177305 /// NM_012495	---	---	---	---	---	---	0001666 // response to hypoxia // inferred from expression pattern /// 0006000 // fructose metabolic process // not recorded /// 0006096 // glycolysis // inferred from electronic annotation /// 0006096 // glycolysis // not recorded /// 0006754 // ATP biosynthetic process // not recorded /// 0006941 // striated muscle contraction // not recorded /// 0008152 // metabolic process // not recorded ///…	0005737 // cytoplasm // inferred from direct assay /// 0005739 // mitochondrion // inferred from direct assay /// 0015629 // actin cytoskeleton // not recorded /// 0019861 // flagellum // inferred from electronic annotation /// 0019861 // flagellum // not recorded /// 0070062 // extracellular vesicular exosome // not recorded	0003824 // catalytic activity // inferred from electronic annotation /// 0004332 // fructose-bisphosphate aldolase activity // inferred from electronic annotation /// 0004332 // fructose-bisphosphate aldolase activity // not recorded /// 0005515 // protein binding // not recorded /// 0008092 // cytoskeletal protein binding // not recorded /// 0016829 // lyase activity // inferred from electronic …	Glycolysis_and_Gluconeogenesis // GenMAPP
1367618_a_at	13.9199	13.8885	13.8447	13.9741	13.2468	13.439	13.2853	13.2637	P	P	P	P	P	P	P	P	Rat Expression Array 230 2.0	Rattus norvegicus	2011-06-09	Consensus sequence	GenBank	Rn.55487.1	gb:NM_130734.1 /DB_XREF=gi:18543330 /GEN=Gnb2l1 /FEA=FLmRNA /CNT=54 /TID=Rn.55487.1 /TIER=FL+Stack /STK=36 /UG=Rn.55487 /LL=83427 /DEF=Rattus norvegicus guanine nucleotide binding protein (G protein), beta polypeptide 2-like 1 (Gnb2l1), mRNA. /PROD=guanine nucleotide binding protein (G protein),beta polypeptide /FL=gb:NM_130734.1 gb:U03390.1	NM_130734	Rn.55487	Rn.55487	November 2004 (Baylor College of Medicine HGSC Rnor3.4)	chr10:34067232-34072596 (+) // 90.77 // p11.22	guanine nucleotide binding protein (G protein), beta polypeptide 2 like 1	Gnb2l1	chr10q21	full length	ENSRNOG00000002390	83427	P63245	---	---	NP_570090	NM_130734	---	---	---	---	---	---	0007205 // activation of protein kinase C activity by G-protein coupled receptor protein signaling pathway // traceable author statement	0005737 // cytoplasm // not recorded /// 0005737 // cytoplasm // inferred from sequence or structural similarity /// 0005737 // cytoplasm // inferred from electronic annotation /// 0005886 // plasma membrane // inferred from electronic annotation /// 0016020 // membrane // inferred from electronic annotation /// 0043025 // neuronal cell body // not recorded /// 0043025 // neuronal cell body // in…	0005080 // protein kinase C binding // inferred from direct assay /// 0005080 // protein kinase C binding // traceable author statement /// 0005515 // protein binding // inferred from electronic annotation /// 0005515 // protein binding // not recorded /// 0019903 // protein phosphatase binding // not recorded	---
1367619_at	13.0386	13.1277	13.0703	13.0449	12.3665	12.3158	12.2991	12.3385	P	P	P	P	P	P	P	P	Rat Expression Array 230 2.0	Rattus norvegicus	2011-06-09	Consensus sequence	GenBank	Rn.37311.1	gb:NM_021766.1 /DB_XREF=gi:11120719 /GEN=25Dx /FEA=FLmRNA /CNT=55 /TID=Rn.37311.1 /TIER=FL+Stack /STK=36 /UG=Rn.37311 /LL=60390 /DEF=Rattus norvegicus 25-Dx protein (25Dx), mRNA. /PROD=25-Dx protein /FL=gb:AF163321.1 gb:NM_021766.1 gb:U63315.1	NM_021766	Rn.37311	Rn.102356	November 2004 (Baylor College of Medicine HGSC Rnor3.4)	chr19:32323283-32325133 (-) // 93.89 // q12 /// chrX:8265539-8273650 (-) // 95.25 // p22.31	progesterone receptor membrane component 1	Pgrmc1	chrXq12	full length	ENSRNOG00000012786	291948	D3ZJS0 /// P70580 /// Q8K484	---	---	NP_068534	NM_021766	---	---	---	---	---	---	0007411 // axon guidance // inferred from expression pattern	0005634 // nucleus // not recorded /// 0005730 // nucleolus // not recorded /// 0005783 // endoplasmic reticulum // inferred from electronic annotation /// 0005783 // endoplasmic reticulum // not recorded /// 0005789 // endoplasmic reticulum membrane // inferred from electronic annotation /// 0005792 // microsome // inferred from electronic annotation /// 0009986 // cell surface // not recorded /…	0004872 // receptor activity // inferred from electronic annotation /// 0005496 // steroid binding // inferred from electronic annotation /// 0005515 // protein binding // not recorded /// 0008289 // lipid binding // inferred from electronic annotation /// 0020037 // heme binding // inferred from electronic annotation	---
1367620_at	13.2758	13.2907	13.1441	13.274	13.258	13.4457	13.3494	13.3049	P	P	P	P	P	P	P	P	Rat Expression Array 230 2.0	Rattus norvegicus	2011-06-09	Consensus sequence	GenBank	Rn.2180.1	gb:NM_053756.1 /DB_XREF=gi:16758591 /GEN=Atp5g3 /FEA=FLmRNA /CNT=41 /TID=Rn.2180.1 /TIER=FL+Stack /STK=36 /UG=Rn.2180 /LL=114630 /DEF=Rattus norvegicus ATP synthase, H+ transporting, mitochondrial F0 complex, subunit c (subunit 9) isoform 3 (Atp5g3), mRNA. /PROD=ATP synthase, H+ transporting, mitochondrial F0complex, subunit c (subunit 9) isoform 3 /FL=gb:AF315374.1 gb:NM_053756.1	NM_053756	Rn.2180	Rn.2180	November 2004 (Baylor College of Medicine HGSC Rnor3.4)	chr3:56511746-56514196 (-) // 95.58 // p14.3	ATP synthase, H+ transporting, mitochondrial F0 complex, subunit C3 (subunit 9)	Atp5g3	chr3q23	full length	ENSRNOG00000001596	114630	Q499S2 /// Q71S46	---	---	NP_446208	NM_053756	---	---	---	---	---	---	0006810 // transport // inferred from electronic annotation /// 0006811 // ion transport // inferred from electronic annotation /// 0007568 // aging // inferred from expression pattern /// 0015986 // ATP synthesis coupled proton transport // inferred from electronic annotation /// 0015992 // proton transport // inferred from electronic annotation /// 0045471 // response to ethanol // inferred fro…	0005739 // mitochondrion // inferred from electronic annotation /// 0005739 // mitochondrion // not recorded /// 0016020 // membrane // inferred from electronic annotation /// 0016021 // integral to membrane // inferred from electronic annotation /// 0031966 // mitochondrial membrane // inferred from electronic annotation /// 0033177 // proton-transporting two-sector ATPase complex, proton-transp…	0005515 // protein binding // inferred from electronic annotation /// 0005515 // protein binding // not recorded /// 0008289 // lipid binding // inferred from electronic annotation /// 0015078 // hydrogen ion transmembrane transporter activity // inferred from electronic annotation /// 0046933 // hydrogen ion transporting ATP synthase activity, rotational mechanism // inferred from electronic ann…	---
1367621_at	8.77234	8.80782	8.99696	9.08221	8.33541	8.61814	8.46038	8.34122	P	P	P	P	P	P	P	P	Rat Expression Array 230 2.0	Rattus norvegicus	2011-06-09	Consensus sequence	GenBank	Rn.2311.1	gb:NM_022546.1 /DB_XREF=gi:11968141 /GEN=Dapkl /FEA=FLmRNA /CNT=42 /TID=Rn.2311.1 /TIER=FL+Stack /STK=36 /UG=Rn.2311 /LL=64391 /DEF=Rattus norvegicus Death-associated like kinase (Dapkl), mRNA. /PROD=Death-associated like kinase /FL=gb:NM_022546.1	NM_022546	Rn.2311	Rn.60353	November 2004 (Baylor College of Medicine HGSC Rnor3.4)	chr7:10007995-10016365 (-) // 98.69 // p21.3	death-associated protein kinase 3	Dapk3	chr7q11	full length	ENSRNOG00000020383	64391	O88209 /// O88764	EC:2.7.11.1	---	NP_071991	NM_022546	---	---	---	---	---	---	0006468 // protein phosphorylation // inferred from direct assay /// 0006468 // protein phosphorylation // inferred from electronic annotation /// 0006468 // protein phosphorylation // not recorded /// 0006915 // apoptosis // inferred from electronic annotation /// 0006917 // induction of apoptosis // inferred from direct assay /// 0006917 // induction of apoptosis // inferred from mutant phenoty…	0000775 // chromosome, centromeric region // inferred from electronic annotation /// 0005634 // nucleus // inferred from direct assay /// 0005634 // nucleus // inferred from electronic annotation /// 0005634 // nucleus // not recorded /// 0005737 // cytoplasm // inferred from electronic annotation	0000166 // nucleotide binding // inferred from electronic annotation /// 0004672 // protein kinase activity // inferred from electronic annotation /// 0004674 // protein serine/threonine kinase activity // inferred from direct assay /// 0004674 // protein serine/threonine kinase activity // not recorded /// 0004674 // protein serine/threonine kinase activity // inferred from electronic annotation…	---
1367622_at	12.9429	12.9684	13.0219	13.0067	12.958	13.089	12.947	13.0177	P	P	P	P	P	P	P	P	Rat Expression Array 230 2.0	Rattus norvegicus	2011-06-09	Consensus sequence	GenBank	Rn.80.1	gb:NM_019383.1 /DB_XREF=gi:9506410 /GEN=Atp5jd /FEA=FLmRNA /CNT=55 /TID=Rn.80.1 /TIER=FL+Stack /STK=35 /UG=Rn.80 /LL=56080 /DEF=Rattus norvegicus ATP synthase subunit d (Atp5jd), mRNA. /PROD=ATP synthase subunit d /FL=gb:D13120.1 gb:D10021.1 gb:NM_019383.1	NM_019383	Rn.80	Rn.80	November 2004 (Baylor College of Medicine HGSC Rnor3.4)	chr5:172410859-172411455 (-) // 81.95 // q35.1	ATP synthase, H+ transporting, mitochondrial F0 complex, subunit d	Atp5h	---	full length	---	641434	D3ZWT8 /// P31399	EC:3.6.1.14	---	NP_062256	NM_019383	---	---	---	---	---	---	0006810 // transport // inferred from electronic annotation /// 0006811 // ion transport // inferred from electronic annotation /// 0015986 // ATP synthesis coupled proton transport // inferred from electronic annotation /// 0015992 // proton transport // inferred from electronic annotation /// 0046034 // ATP metabolic process // inferred from direct assay	0000276 // mitochondrial proton-transporting ATP synthase complex, coupling factor F(o) // inferred from direct assay /// 0000276 // mitochondrial proton-transporting ATP synthase complex, coupling factor F(o) // inferred from electronic annotation /// 0005739 // mitochondrion // traceable author statement /// 0005739 // mitochondrion // inferred from electronic annotation /// 0005743 // mitochon…	0015078 // hydrogen ion transmembrane transporter activity // traceable author statement /// 0015078 // hydrogen ion transmembrane transporter activity // inferred from electronic annotation	---
1367623_at	13.9771	13.9717	13.9673	14.1057	13.3861	13.5685	13.3367	13.3701	P	P	P	P	P	P	P	P	Rat Expression Array 230 2.0	Rattus norvegicus	2011-06-09	Consensus sequence	GenBank	Rn.484.1	gb:NM_031102.1 /DB_XREF=gi:13592056 /GEN=Rpl18 /FEA=FLmRNA /CNT=58 /TID=Rn.484.1 /TIER=FL+Stack /STK=35 /UG=Rn.484 /LL=81766 /DEF=Rattus norvegicus ribosomal protein L18 (Rpl18), mRNA. /PROD=ribosomal protein L18 /FL=gb:M20156.1 gb:NM_031102.1	NM_031102	Rn.484	Rn.484	November 2004 (Baylor College of Medicine HGSC Rnor3.4)	chr1:96186535-96189192 (+) // 97.1 // p21.3 /// chr18:62871772-62872407 (+) // 94.05 // q22.1 /// chrX:122487449-122488093 (+) // 91.01 // q25	ribosomal protein L18	Rpl18	chr1q22	full length	ENSRNOG00000021035	81766	P12001 /// Q0QEW8	---	---	NP_112364	NM_031102	---	---	---	---	---	---	0006412 // translation // inferred from electronic annotation /// 0006414 // translational elongation // not recorded	0005622 // intracellular // inferred from electronic annotation /// 0005737 // cytoplasm // inferred from electronic annotation /// 0005829 // cytosol // not recorded /// 0005840 // ribosome // inferred from electronic annotation /// 0030529 // ribonucleoprotein complex // inferred from electronic annotation	0003735 // structural constituent of ribosome // inferred from electronic annotation	Ribosomal_Proteins // GenMAPP
1367624_at	12.6431	12.637	12.7187	12.8411	12.7261	12.7704	12.7324	12.6639	P	P	P	P	P	P	P	P	Rat Expression Array 230 2.0	Rattus norvegicus	2011-06-09	Consensus sequence	GenBank	Rn.2423.1	gb:NM_024403.1 /DB_XREF=gi:13242321 /GEN=Atf4 /FEA=FLmRNA /CNT=56 /TID=Rn.2423.1 /TIER=FL+Stack /STK=35 /UG=Rn.2423 /LL=79255 /DEF=Rattus norvegicus activating transcription factor ATF-4 (Atf4), mRNA. /PROD=activating transcription factor ATF-4 /FL=gb:AF252627.1 gb:NM_024403.1	NM_024403	Rn.2423	Rn.2423	November 2004 (Baylor College of Medicine HGSC Rnor3.4)	chr7:118536946-118538993 (+) // 97.97 // q31.31	activating transcription factor 4 (tax-responsive enhancer element B67)	Atf4	chr7q34	full length	ENSRNOG00000017801	79255	B0BMW3 /// Q9ES19	---	---	NP_077379	NM_024403	---	---	---	---	---	---	0006094 // gluconeogenesis // not recorded /// 0006350 // transcription // inferred from electronic annotation /// 0006355 // regulation of transcription, DNA-dependent // inferred from electronic annotation /// 0006355 // regulation of transcription, DNA-dependent // not recorded /// 0006950 // response to stress // not recorded /// 0007214 // gamma-aminobutyric acid signaling pathway // inferre…	0005634 // nucleus // inferred from direct assay /// 0005634 // nucleus // not recorded /// 0005634 // nucleus // inferred from electronic annotation /// 0005667 // transcription factor complex // not recorded /// 0005737 // cytoplasm // inferred from direct assay /// 0005737 // cytoplasm // not recorded /// 0005737 // cytoplasm // inferred from electronic annotation /// 0005886 // plasma membran…	0003677 // DNA binding // not recorded /// 0003677 // DNA binding // inferred from electronic annotation /// 0003700 // sequence-specific DNA binding transcription factor activity // inferred from electronic annotation /// 0003704 // specific RNA polymerase II transcription factor activity // not recorded /// 0005515 // protein binding // not recorded /// 0008022 // protein C-terminus binding // …	Smooth_muscle_contraction // GenMAPP
1367625_at	14.15	14.1938	14.0913	14.3111	13.5279	13.6616	13.5175	13.5525	P	P	P	P	P	P	P	P	Rat Expression Array 230 2.0	Rattus norvegicus	2011-06-09	Consensus sequence	GenBank	Rn.5976.1	gb:NM_031100.1 /DB_XREF=gi:13592052 /GEN=Rpl10 /FEA=FLmRNA /CNT=72 /TID=Rn.5976.1 /TIER=FL+Stack /STK=34 /UG=Rn.5976 /LL=81764 /DEF=Rattus norvegicus ribosomal protein L10 (Rpl10), mRNA. /PROD=ribosomal protein L10 /FL=gb:NM_031100.1	NM_031100	Rn.5976	Rn.102157	November 2004 (Baylor College of Medicine HGSC Rnor3.4)	chr18:15638983-15639740 (+) // 93.32 // p11.1 /// chr3:58396661-58397413 (-) // 90.18 // p14.3 /// chrX:160336627-160338842 (-) // 96.6 //	ribosomal protein L10	Rpl10	chrXq37	full length	ENSRNOG00000027149	81764	Q6PDV7	---	---	NP_112362	NM_031100	---	---	---	---	---	---	0006412 // translation // inferred from electronic annotation /// 0006414 // translational elongation // not recorded	0005622 // intracellular // inferred from electronic annotation /// 0005737 // cytoplasm // inferred from electronic annotation /// 0005737 // cytoplasm // not recorded /// 0005783 // endoplasmic reticulum // inferred from electronic annotation /// 0005783 // endoplasmic reticulum // not recorded /// 0005829 // cytosol // not recorded /// 0005840 // ribosome // inferred from electronic annotation…	0003735 // structural constituent of ribosome // inferred from electronic annotation /// 0003735 // structural constituent of ribosome // not recorded	---
1367626_at	2.37595	2.3405	2.35741	2.49665	2.60692	2.461	2.57323	2.56574	A	A	A	P	P	P	M	P	Rat Expression Array 230 2.0	Rattus norvegicus	2011-06-09	Consensus sequence	GenBank	Rn.10756.1	gb:NM_012530.1 /DB_XREF=gi:6978660 /GEN=Ckm /FEA=FLmRNA /CNT=40 /TID=Rn.10756.1 /TIER=FL+Stack /STK=34 /UG=Rn.10756 /LL=24265 /DEF=Rattus norvegicus Creatine kinase, muscle form (Ckm), mRNA. /PROD=creatine kinase, muscle form /FL=gb:M10140.1 gb:NM_012530.1	NM_012530	Rn.10756	Rn.10756	November 2004 (Baylor College of Medicine HGSC Rnor3.4)	chr1:78762201-78772682 (+) // 97.44 // p31.1	creatine kinase, muscle	Ckm	chr1q21	full length	ENSRNOG00000016837	24265	P00564	EC:2.7.3.2	---	NP_036662	NM_012530	---	---	---	---	---	---	0006600 // creatine metabolic process // not recorded /// 0016310 // phosphorylation // not recorded /// 0046314 // phosphocreatine biosynthetic process // inferred from direct assay /// 0046314 // phosphocreatine biosynthetic process // not recorded /// 0046314 // phosphocreatine biosynthetic process // traceable author statement /// 0046314 // phosphocreatine biosynthetic process // inferred fr…	0005737 // cytoplasm // inferred from electronic annotation /// 0005829 // cytosol // not recorded	0000166 // nucleotide binding // inferred from electronic annotation /// 0003824 // catalytic activity // inferred from electronic annotation /// 0004111 // creatine kinase activity // inferred from direct assay /// 0004111 // creatine kinase activity // not recorded /// 0004111 // creatine kinase activity // traceable author statement /// 0004111 // creatine kinase activity // inferred from elec…	---
1367627_at	1.95944	2.00363	2.00017	1.99061	2.04749	2.08418	1.86632	1.94943	A	A	A	A	A	A	A	A	Rat Expression Array 230 2.0	Rattus norvegicus	2011-06-09	Consensus sequence	GenBank	Rn.33427.1	gb:NM_031031.1 /DB_XREF=gi:13591948 /GEN=Gatm /FEA=FLmRNA /CNT=40 /TID=Rn.33427.1 /TIER=FL+Stack /STK=34 /UG=Rn.33427 /LL=81660 /DEF=Rattus norvegicus L-arginine: glycine amidinotransferase (Gatm), mRNA. /PROD=L-arginine: glycine amidinotransferase /FL=gb:NM_031031.1	NM_031031	Rn.33427	Rn.17661	November 2004 (Baylor College of Medicine HGSC Rnor3.4)	---	glycine amidinotransferase (L-arginine:glycine amidinotransferase)	Gatm	chr3q35	full length	---	81660	P50442	EC:2.1.4.1	---	NP_112293	NM_031031	---	---	---	---	---	---	0006600 // creatine metabolic process // not recorded /// 0006601 // creatine biosynthetic process // not recorded /// 0006601 // creatine biosynthetic process // traceable author statement /// 0006601 // creatine biosynthetic process // inferred from electronic annotation /// 0006979 // response to oxidative stress // inferred from expression pattern /// 0007584 // response to nutrient // inferr…	0005739 // mitochondrion // inferred from electronic annotation /// 0005739 // mitochondrion // not recorded /// 0005743 // mitochondrial inner membrane // inferred from electronic annotation /// 0005758 // mitochondrial intermembrane space // inferred from electronic annotation /// 0005758 // mitochondrial intermembrane space // not recorded /// 0016020 // membrane // inferred from electronic an…	0005515 // protein binding // inferred from electronic annotation /// 0005515 // protein binding // not recorded /// 0015067 // amidinotransferase activity // inferred from direct assay /// 0015068 // glycine amidinotransferase activity // inferred from electronic annotation /// 0015068 // glycine amidinotransferase activity // not recorded /// 0016740 // transferase activity // inferred from ele…	---
1367628_at	12.9927	13.042	13.2134	13.2481	9.40114	9.39357	9.64095	9.57486	P	P	P	P	P	P	P	P	Rat Expression Array 230 2.0	Rattus norvegicus	2011-06-09	Consensus sequence	GenBank	Rn.57.1	gb:NM_019904.1 /DB_XREF=gi:9845260 /GEN=Lgals1 /FEA=FLmRNA /CNT=74 /TID=Rn.57.1 /TIER=FL+Stack /STK=33 /UG=Rn.57 /LL=56646 /DEF=Rattus norvegicus beta-galactoside-binding lectin (Lgals1), mRNA. /PROD=beta-galactoside-binding lectin /FL=gb:M19036.1 gb:NM_019904.1	NM_019904	Rn.57	Rn.57	November 2004 (Baylor College of Medicine HGSC Rnor3.4)	chr7:116893647-116896768 (+) // 96.82 // q31.2	lectin, galactoside-binding, soluble, 1	Lgals1	chr7q34	full length	ENSRNOG00000009884	56646	P11762	---	---	NP_063969	NM_019904	---	---	---	---	---	---	0010812 // negative regulation of cell-substrate adhesion // inferred from direct assay /// 0010977 // negative regulation of neuron projection development // inferred from mutant phenotype /// 0033555 // multicellular organismal response to stress // inferred from expression pattern /// 0034120 // positive regulation of erythrocyte aggregation // inferred from direct assay /// 0042493 // respons…	0005576 // extracellular region // inferred from electronic annotation /// 0005578 // proteinaceous extracellular matrix // inferred from electronic annotation /// 0005615 // extracellular space // inferred from electronic annotation /// 0005615 // extracellular space // not recorded /// 0005622 // intracellular // inferred from electronic annotation /// 0005622 // intracellular // not recorded /…	0001948 // glycoprotein binding // inferred from physical interaction /// 0004871 // signal transducer activity // inferred from electronic annotation /// 0004871 // signal transducer activity // not recorded /// 0005515 // protein binding // not recorded /// 0005515 // protein binding // inferred from electronic annotation /// 0005529 // sugar binding // inferred from electronic annotation /// 0…	---
1367629_at	13.6148	13.62	13.6207	13.589	12.9168	13.0708	12.9517	12.9557	P	P	P	P	P	P	P	P	Rat Expression Array 230 2.0	Rattus norvegicus	2011-06-09	Consensus sequence	GenBank	Rn.1745.1	gb:NM_022503.1 /DB_XREF=gi:11968071 /GEN=Cox7a3 /FEA=FLmRNA /CNT=49 /TID=Rn.1745.1 /TIER=FL+Stack /STK=33 /UG=Rn.1745 /LL=29507 /DEF=Rattus norvegicus cytochrome c oxidase subunit VIIa 3 (Cox7a3), mRNA. /PROD=cytochrome c oxidase subunit VIIa 3 /FL=gb:NM_022503.1	NM_022503	Rn.1745	Rn.1745	November 2004 (Baylor College of Medicine HGSC Rnor3.4)	chr8:84813293-84817397 (-) // 94.9 // q21.2	cytochrome c oxidase subunit VIIa polypeptide 2	Cox7a2	chr8q24-q31	full length	ENSRNOG00000027791 /// ENSRNOG00000042903	29507	B2RYS0 /// P35171	EC:1.9.3.1	---	NP_071948	NM_022503	---	---	---	---	---	---	---	0005739 // mitochondrion // inferred from electronic annotation /// 0005739 // mitochondrion // not recorded /// 0005743 // mitochondrial inner membrane // not recorded /// 0005743 // mitochondrial inner membrane // inferred from electronic annotation /// 0005746 // mitochondrial respiratory chain // inferred from electronic annotation /// 0016020 // membrane // inferred from electronic annotation	0004129 // cytochrome-c oxidase activity // inferred from electronic annotation /// 0009055 // electron carrier activity // inferred from electronic annotation	Electron_Transport_Chain // GenMAPP
1367630_at	14.4277	14.4514	14.3648	14.5042	13.7	13.9226	13.6974	13.7493	P	P	P	P	P	P	P	P	Rat Expression Array 230 2.0	Rattus norvegicus	2011-06-09	Consensus sequence	GenBank	Rn.2177.1	gb:NM_031110.1 /DB_XREF=gi:13592070 /GEN=Rps11 /FEA=FLmRNA /CNT=44 /TID=Rn.2177.1 /TIER=FL+Stack /STK=33 /UG=Rn.2177 /LL=81774 /DEF=Rattus norvegicus ribosomal protein S11 (Rps11), mRNA. /PROD=ribosomal protein S11 /FL=gb:K03250.1 gb:NM_031110.1	NM_031110	Rn.2177	Rn.2177	November 2004 (Baylor College of Medicine HGSC Rnor3.4)	chr5:146409630-146410326 (+) // 88.37 // q32 /// chr1:95596744-95598095 (-) // 86.21 // p21.3	ribosomal protein S11	Rps11	chr1q22	full length	ENSRNOG00000020595	81774	D3ZE37 /// P62282 /// Q6PDV9	---	---	NP_112372	NM_031110	---	---	---	---	---	---	0006412 // translation // inferred from electronic annotation /// 0006414 // translational elongation // not recorded	0005622 // intracellular // inferred from electronic annotation /// 0005829 // cytosol // not recorded /// 0005840 // ribosome // inferred from electronic annotation /// 0022627 // cytosolic small ribosomal subunit // inferred from direct assay /// 0022627 // cytosolic small ribosomal subunit // not recorded /// 0030529 // ribonucleoprotein complex // inferred from electronic annotation	0003723 // RNA binding // inferred from electronic annotation /// 0003735 // structural constituent of ribosome // inferred from electronic annotation /// 0005515 // protein binding // not recorded /// 0019843 // rRNA binding // inferred from electronic annotation	---
1367631_at	13.9211	13.9044	13.9148	14.1417	1.98999	1.92179	1.96908	2.04725	P	P	P	P	A	A	A	A	Rat Expression Array 230 2.0	Rattus norvegicus	2011-06-09	Consensus sequence	GenBank	Rn.17145.1	gb:NM_022266.1 /DB_XREF=gi:11560084 /GEN=Ctgf /FEA=FLmRNA /CNT=48 /TID=Rn.17145.1 /TIER=FL+Stack /STK=33 /UG=Rn.17145 /LL=64032 /DEF=Rattus norvegicus connective tissue growth factor (Ctgf), mRNA. /PROD=connective tissue growth factor /FL=gb:AF120275.1 gb:NM_022266.1 gb:AB023068.1	NM_022266	Rn.17145	Rn.17145	November 2004 (Baylor College of Medicine HGSC Rnor3.4)	chr1:21327106-21330215 (-) // 98.89 // p36.12	connective tissue growth factor	Ctgf	chr1p12	full length	ENSRNOG00000015036	64032	Q6IN11 /// Q9R1E9 /// Q9R2C0 /// Q9Z164	---	---	NP_071602	NM_022266	---	---	---	---	---	---	0001502 // cartilage condensation // inferred from electronic annotation /// 0001502 // cartilage condensation // not recorded /// 0001503 // ossification // inferred from electronic annotation /// 0001503 // ossification // not recorded /// 0001525 // angiogenesis // not recorded /// 0001525 // angiogenesis // traceable author statement /// 0001525 // angiogenesis // inferred from electronic ann…	0005576 // extracellular region // inferred from electronic annotation /// 0005576 // extracellular region // not recorded /// 0005578 // proteinaceous extracellular matrix // inferred from electronic annotation /// 0005578 // proteinaceous extracellular matrix // not recorded /// 0005615 // extracellular space // inferred from direct assay /// 0005801 // cis-Golgi network // inferred from direct…	0001968 // fibronectin binding // inferred from direct assay /// 0005178 // integrin binding // inferred from electronic annotation /// 0005178 // integrin binding // not recorded /// 0005520 // insulin-like growth factor binding // inferred from electronic annotation /// 0008083 // growth factor activity // inferred from direct assay /// 0008201 // heparin binding // not recorded /// 0008201 // …	---
1367632_at	11.8086	11.8093	12.0782	12.0642	9.38706	9.31831	9.16829	9.00852	P	P	P	P	P	P	P	P	Rat Expression Array 230 2.0	Rattus norvegicus	2011-06-09	Consensus sequence	GenBank	Rn.2204.1	gb:NM_017073.1 /DB_XREF=gi:8393455 /GEN=Glul /FEA=FLmRNA /CNT=89 /TID=Rn.2204.1 /TIER=FL+Stack /STK=32 /UG=Rn.2204 /LL=24957 /DEF=Rattus norvegicus Glutamine synthetase (glutamate-ammonia ligase) (Glul), mRNA. /PROD=glutamine synthetase (glutamate-ammonia ligase) /FL=gb:M91652.1 gb:M29579.1 gb:NM_017073.1	NM_017073	Rn.2204	Rn.2204	November 2004 (Baylor College of Medicine HGSC Rnor3.4)	---	glutamate-ammonia ligase (glutamine synthetase)	Glul	chr13q22	full length	---	24957	P09606	EC:4.1.1.15 /// EC:6.3.1.2	---	NP_058769	NM_017073	---	---	---	---	---	---	0006536 // glutamate metabolic process // inferred from direct assay /// 0006542 // glutamine biosynthetic process // inferred from direct assay /// 0006542 // glutamine biosynthetic process // inferred from electronic annotation /// 0006807 // nitrogen compound metabolic process // inferred from electronic annotation /// 0008283 // cell proliferation // not recorded /// 0009749 // response to gl…	0005622 // intracellular // not recorded /// 0005625 // soluble fraction // inferred from direct assay /// 0005737 // cytoplasm // inferred from direct assay /// 0005737 // cytoplasm // not recorded /// 0005737 // cytoplasm // inferred from electronic annotation /// 0005739 // mitochondrion // inferred from electronic annotation /// 0005739 // mitochondrion // not recorded /// 0005791 // rough en…	0000166 // nucleotide binding // inferred from electronic annotation /// 0000287 // magnesium ion binding // inferred from direct assay /// 0003824 // catalytic activity // inferred from electronic annotation /// 0004351 // glutamate decarboxylase activity // inferred from electronic annotation /// 0004356 // glutamate-ammonia ligase activity // inferred from direct assay /// 0004356 // glutamate…	---
1367633_at	9.65844	9.27364	9.36141	9.76611	6.61412	7.30106	7.08913	7.4595	P	P	P	P	P	P	P	P	Rat Expression Array 230 2.0	Rattus norvegicus	2011-06-09	Consensus sequence	GenBank	Rn.2204.1	gb:BI296610 /DB_XREF=gi:14961206 /DB_XREF=UI-R-CV2-cgt-c-03-0-UI.s1 /CLONE=UI-R-CV2-cgt-c-03-0-UI /FEA=FLmRNA /CNT=89 /TID=Rn.2204.1 /TIER=Stack /STK=6 /UG=Rn.2204 /LL=24957 /UG_GENE=Glul /UG_TITLE=Glutamine synthetase (glutamate-ammonia ligase) /FL=gb:M91652.1 gb:M29579.1 gb:NM_017073.1	BI296610	Rn.2204	Rn.2204	November 2004 (Baylor College of Medicine HGSC Rnor3.4)	---	glutamate-ammonia ligase (glutamine synthetase)	Glul	chr13q22	full length	---	24957	P09606	EC:4.1.1.15 /// EC:6.3.1.2	---	NP_058769	NM_017073	---	---	---	---	---	---	0006536 // glutamate metabolic process // inferred from direct assay /// 0006542 // glutamine biosynthetic process // inferred from direct assay /// 0006542 // glutamine biosynthetic process // inferred from electronic annotation /// 0006807 // nitrogen compound metabolic process // inferred from electronic annotation /// 0008283 // cell proliferation // not recorded /// 0009749 // response to gl…	0005622 // intracellular // not recorded /// 0005625 // soluble fraction // inferred from direct assay /// 0005737 // cytoplasm // inferred from direct assay /// 0005737 // cytoplasm // not recorded /// 0005737 // cytoplasm // inferred from electronic annotation /// 0005739 // mitochondrion // inferred from electronic annotation /// 0005739 // mitochondrion // not recorded /// 0005791 // rough en…	0000166 // nucleotide binding // inferred from electronic annotation /// 0000287 // magnesium ion binding // inferred from direct assay /// 0003824 // catalytic activity // inferred from electronic annotation /// 0004351 // glutamate decarboxylase activity // inferred from electronic annotation /// 0004356 // glutamate-ammonia ligase activity // inferred from direct assay /// 0004356 // glutamate…	---
1367634_at	14.7381	14.723	14.6356	14.87	14.0571	14.2603	14.0468	14.1714	P	P	P	P	P	P	P	P	Rat Expression Array 230 2.0	Rattus norvegicus	2011-06-09	Consensus sequence	GenBank	Rn.1101.1	gb:NM_022506.1 /DB_XREF=gi:11968077 /GEN=Rpl31 /FEA=FLmRNA /CNT=42 /TID=Rn.1101.1 /TIER=FL+Stack /STK=32 /UG=Rn.1101 /LL=64298 /DEF=Rattus norvegicus ribosomal protein L31 (Rpl31), mRNA. /PROD=ribosomal protein L31 /FL=gb:NM_022506.1	NM_022506	Rn.1101	Rn.1101	November 2004 (Baylor College of Medicine HGSC Rnor3.4)	chr10:34275337-34275777 (+) // 93.68 // p11.22 /// chr13:49447528-49447962 (+) // 91.29 // q14.2 /// chr18:60230616-60231053 (+) // 91.94 // q21.33 /// chr18:40334405-40334842 (+) // 90.2 // q12.3 /// chr4:118608804-118609243 (+) // 92.16 // q26 /// chr9:38439429-38442916 (+) // 95.86 // p13.1 /// chrX:26282684-26283123 (+) // 91.94 // p21.3 /// chr12:17453657-17454091 (-) // 93.68 // p12.3 /// c…	ribosomal protein L31	Rpl31	chr9q21	full length	ENSRNOG00000013508 /// ENSRNOG00000033024 /// ENSRNOG00000039249	64298	D3ZX87 /// D4ABZ9 /// P62902	---	---	NP_071951	NM_022506	---	---	---	---	---	---	0006412 // translation // inferred from electronic annotation /// 0006414 // translational elongation // not recorded	0005622 // intracellular // inferred from electronic annotation /// 0005829 // cytosol // not recorded /// 0005840 // ribosome // inferred from electronic annotation /// 0030529 // ribonucleoprotein complex // inferred from electronic annotation	0003735 // structural constituent of ribosome // inferred from electronic annotation /// 0005515 // protein binding // not recorded	---
1367635_at	13.4878	13.5665	13.4567	13.6104	12.6342	12.728	12.6468	12.6081	P	P	P	P	P	P	P	P	Rat Expression Array 230 2.0	Rattus norvegicus	2011-06-09	Consensus sequence	GenBank	Rn.4234.1	gb:NM_012998.1 /DB_XREF=gi:6981323 /GEN=P4hb /FEA=FLmRNA /CNT=50 /TID=Rn.4234.1 /TIER=FL+Stack /STK=32 /UG=Rn.4234 /LL=25506 /DEF=Rattus norvegicus Protein disulfide isomerase (Prolyl 4-hydroxylase, beta polypeptide) (P4hb), mRNA. /PROD=protein disulfide isomerase (Prolyl4-hydroxylase, beta polypeptide) /FL=gb:NM_012998.1	NM_012998	Rn.4234	Rn.4234	November 2004 (Baylor College of Medicine HGSC Rnor3.4)	chr10:109950222-109961719 (-) // 98.75 // q25.1	prolyl 4-hydroxylase, beta polypeptide	P4hb	chr10q32.3	full length	ENSRNOG00000036689	25506	P04785	EC:5.3.4.1	---	NP_037130	NM_012998	---	---	---	---	---	---	0006662 // glycerol ether metabolic process // inferred from electronic annotation /// 0018401 // peptidyl-proline hydroxylation to 4-hydroxy-L-proline // inferred from electronic annotation /// 0018401 // peptidyl-proline hydroxylation to 4-hydroxy-L-proline // not recorded /// 0045454 // cell redox homeostasis // inferred from electronic annotation	0005783 // endoplasmic reticulum // inferred from electronic annotation /// 0005783 // endoplasmic reticulum // not recorded /// 0005788 // endoplasmic reticulum lumen // inferred from electronic annotation /// 0005792 // microsome // inferred from electronic annotation /// 0005792 // microsome // not recorded /// 0005793 // ER-Golgi intermediate compartment // inferred from electronic annotation…	0003756 // protein disulfide isomerase activity // inferred from mutant phenotype /// 0003756 // protein disulfide isomerase activity // inferred from electronic annotation /// 0004656 // procollagen-proline 4-dioxygenase activity // inferred from electronic annotation /// 0004656 // procollagen-proline 4-dioxygenase activity // not recorded /// 0005515 // protein binding // inferred from electro…	---
1367636_at	9.61556	9.93353	9.83011	9.5473	2.37923	2.43882	2.33307	2.30007	P	P	P	P	A	P	A	A	Rat Expression Array 230 2.0	Rattus norvegicus	2011-06-09	Consensus sequence	GenBank	Rn.270.1	gb:NM_012756.1 /DB_XREF=gi:6981077 /GEN=Igf2r /FEA=FLmRNA /CNT=64 /TID=Rn.270.1 /TIER=FL+Stack /STK=32 /UG=Rn.270 /LL=25151 /DEF=Rattus norvegicus Insulin-like growth factor 2 receptor (Igf2r), mRNA. /PROD=insulin-like growth factor 2 receptor /FL=gb:U59809.1 gb:NM_012756.1	NM_012756	Rn.270	Rn.270	November 2004 (Baylor College of Medicine HGSC Rnor3.4)	chr1:42251747-42341646 (+) // 97.4 // p34.2	insulin-like growth factor 2 receptor	Igf2r	chr1q11	full length	ENSRNOG00000014997	25151	Q63002	---	---	NP_036888	NM_012756	---	---	---	---	---	---	0001889 // liver development // inferred from direct assay /// 0006810 // transport // inferred from electronic annotation /// 0007186 // G-protein coupled receptor protein signaling pathway // inferred from mutant phenotype /// 0007283 // spermatogenesis // inferred from expression pattern /// 0009791 // post-embryonic development // inferred from expression pattern /// 0015031 // protein transp…	0005615 // extracellular space // inferred from direct assay /// 0005624 // membrane fraction // inferred from direct assay /// 0005624 // membrane fraction // not recorded /// 0005624 // membrane fraction // inferred from electronic annotation /// 0005634 // nucleus // inferred from electronic annotation /// 0005634 // nucleus // not recorded /// 0005641 // nuclear envelope lumen // inferred fro…	0001948 // glycoprotein binding // inferred from electronic annotation /// 0001948 // glycoprotein binding // not recorded /// 0001965 // G-protein alpha-subunit binding // inferred from direct assay /// 0001972 // retinoic acid binding // inferred from direct assay /// 0004872 // receptor activity // inferred from electronic annotation /// 0004930 // G-protein coupled receptor activity // inferr…	---
1367637_a_at	12.8896	12.8389	12.9287	12.9671	13.3725	13.4068	13.2727	13.3698	P	P	P	P	P	P	P	P	Rat Expression Array 230 2.0	Rattus norvegicus	2011-06-09	Consensus sequence	GenBank	Rn.1495.1	gb:NM_022498.1 /DB_XREF=gi:11968061 /GEN=Ppp1cc /FEA=FLmRNA /CNT=45 /TID=Rn.1495.1 /TIER=FL+Stack /STK=32 /UG=Rn.1495 /LL=24669 /DEF=Rattus norvegicus Protein phosphatase 1, catalytic subunit, gamma isoform 1 (Ppp1cc), mRNA. /PROD=protein phosphatase 1, catalytic subunit, gammaisoform 1 /FL=gb:D90165.1 gb:NM_022498.1	NM_022498	Rn.1495	Rn.1495	November 2004 (Baylor College of Medicine HGSC Rnor3.4)	chr12:35580166-35598249 (-) // 97.89 // p11.1	protein phosphatase 1, catalytic subunit, gamma isoform	Ppp1cc	chr12q16	full length	ENSRNOG00000001269	24669	P63088 /// Q04101 /// Q6AYZ4	EC:3.1.3.16	---	NP_071943	NM_022498	---	---	---	---	---	---	0005975 // carbohydrate metabolic process // inferred from electronic annotation /// 0005977 // glycogen metabolic process // inferred from electronic annotation /// 0006470 // protein dephosphorylation // inferred from electronic annotation /// 0006470 // protein dephosphorylation // not recorded /// 0007049 // cell cycle // inferred from electronic annotation /// 0046822 // regulation of nucleo…	0000775 // chromosome, centromeric region // inferred from electronic annotation /// 0000776 // kinetochore // inferred from electronic annotation /// 0000777 // condensed chromosome kinetochore // inferred from electronic annotation /// 0005634 // nucleus // not recorded /// 0005634 // nucleus // inferred from electronic annotation /// 0005654 // nucleoplasm // inferred from electronic annotatio…	0004721 // phosphoprotein phosphatase activity // inferred from electronic annotation /// 0004722 // protein serine/threonine phosphatase activity // inferred from electronic annotation /// 0004722 // protein serine/threonine phosphatase activity // not recorded /// 0005515 // protein binding // not recorded /// 0005515 // protein binding // inferred from physical interaction /// 0005515 // prote…	---
1367638_at	6.26582	6.11262	6.25534	6.66545	4.58155	4.99833	4.48964	4.30167	P	P	P	P	A	A	A	A	Rat Expression Array 230 2.0	Rattus norvegicus	2011-06-09	Consensus sequence	GenBank	Rn.13468.1	gb:NM_053477.1 /DB_XREF=gi:16758229 /GEN=Mlycd /FEA=FLmRNA /CNT=34 /TID=Rn.13468.1 /TIER=FL+Stack /STK=32 /UG=Rn.13468 /LL=85239 /DEF=Rattus norvegicus malonyl-CoA decarboxylase (Mlycd), mRNA. /PROD=malonyl-CoA decarboxylase /FL=gb:AF304865.1 gb:NM_053477.1	NM_053477	Rn.13468	Rn.13468	November 2004 (Baylor College of Medicine HGSC Rnor3.4)	chr19:49637192-49653015 (+) // 98.97 // q13.33	malonyl-CoA decarboxylase	Mlycd	chr19q12	full length	ENSRNOG00000014522	85239	Q8CJ73 /// Q920F5	EC:4.1.1.9	---	NP_445929	NM_053477	---	---	---	---	---	---	0006085 // acetyl-CoA biosynthetic process // inferred from direct assay /// 0006633 // fatty acid biosynthetic process // inferred from electronic annotation /// 0008610 // lipid biosynthetic process // inferred from electronic annotation /// 0019395 // fatty acid oxidation // inferred from direct assay /// 0031998 // regulation of fatty acid beta-oxidation // inferred from direct assay /// 0046…	0005737 // cytoplasm // inferred from electronic annotation /// 0005739 // mitochondrion // inferred from direct assay /// 0005739 // mitochondrion // not recorded /// 0005739 // mitochondrion // inferred from electronic annotation /// 0005777 // peroxisome // inferred from direct assay /// 0005777 // peroxisome // inferred from electronic annotation /// 0005829 // cytosol // inferred from direct…	0016829 // lyase activity // inferred from electronic annotation /// 0016831 // carboxy-lyase activity // inferred from electronic annotation /// 0050080 // malonyl-CoA decarboxylase activity // inferred from direct assay /// 0050080 // malonyl-CoA decarboxylase activity // inferred from electronic annotation	---
1367639_a_at	14.4576	14.4587	14.3628	14.5877	13.8425	14.0716	13.824	13.9091	P	P	P	P	P	P	P	P	Rat Expression Array 230 2.0	Rattus norvegicus	2011-06-09	Consensus sequence	GenBank	Rn.2115.2	gb:U92700.1 /DB_XREF=gi:2920832 /FEA=FLmRNA /CNT=1 /TID=Rn.2115.2 /TIER=FL /STK=1 /UG=Rn.2115 /LL=83789 /UG_GENE=Rps2 /DEF=Rattus norvegicus ribosomal protein S2 mRNA, complete cds. /PROD=ribosomal protein S2 /FL=gb:U92700.1	U92700	Rn.2115	Rn.2115	November 2004 (Baylor College of Medicine HGSC Rnor3.4)	chr1:88006862-88007772 (+) // 99.09 // p22.3 /// chr1:55888134-55889016 (+) // 92.43 // p32.3 /// chr10:13975494-13977163 (+) // 99.09 // p13 /// chr10:38751644-38752537 (+) // 95.82 // p11.1 /// chr10:53261586-53262457 (+) // 90.73 // q21.1 /// chr11:39166425-39167311 (+) // 95.82 // p12 /// chr14:38363942-38364801 (+) // 96.34 // q21.1 /// chr19:13843228-13844121 (+) // 99.61 // p13.2 /// chr3:…	ribosomal protein S2-like /// ribosomal protein S2	LOC100360710 /// Rps2	chr10q12	full length	ENSRNOG00000014179 /// ENSRNOG00000018121 /// ENSRNOG00000022934 /// ENSRNOG00000030174 /// ENSRNOG00000037380	100360710 /// 83789	D3ZQW7 /// O55211 /// O55212 /// O55213 /// O55214 /// O55215 /// P27952 /// Q6P9V0	---	---	NP_114026 /// XP_002727211 /// XP_002727212 /// XP_002727213 /// XP_002730045 /// XP_002730046 /// XP_002730047	NM_031838 /// XM_002727165 /// XM_002727166 /// XM_002727167 /// XM_002729999 /// XM_002730000 /// XM_002730001	---	---	---	---	---	---	0000028 // ribosomal small subunit assembly // inferred from mutant phenotype /// 0001731 // formation of translation preinitiation complex // inferred from mutant phenotype /// 0006412 // translation // inferred from electronic annotation	0005622 // intracellular // inferred from electronic annotation /// 0005634 // nucleus // not recorded /// 0005654 // nucleoplasm // not recorded /// 0005730 // nucleolus // not recorded /// 0005829 // cytosol // not recorded /// 0005840 // ribosome // inferred from electronic annotation /// 0015935 // small ribosomal subunit // inferred from electronic annotation /// 0022627 // cytosolic small r…	0003723 // RNA binding // inferred from electronic annotation /// 0003735 // structural constituent of ribosome // inferred from electronic annotation /// 0003735 // structural constituent of ribosome // inferred from mutant phenotype /// 0003735 // structural constituent of ribosome // not recorded /// 0005515 // protein binding // not recorded /// 0032403 // protein complex binding // inferred …	Ribosomal_Proteins // GenMAPP
1367640_at	14.7905	14.7944	14.7165	14.9038	13.7278	13.8748	13.663	13.7554	P	P	P	P	P	P	P	P	Rat Expression Array 230 2.0	Rattus norvegicus	2011-06-09	Consensus sequence	GenBank	Rn.8400.1	gb:NM_031709.1 /DB_XREF=gi:13928991 /GEN=Rps12 /FEA=FLmRNA /CNT=56 /TID=Rn.8400.1 /TIER=FL+Stack /STK=31 /UG=Rn.8400 /LL=65139 /DEF=Rattus norvegicus ribosomal protein S12 (Rps12), mRNA. /PROD=ribosomal protein S12 /FL=gb:NM_031709.1 gb:M18547.1	NM_031709	Rn.8400	Rn.8400	November 2004 (Baylor College of Medicine HGSC Rnor3.4)	chr1:259818347-259818859 (+) // 92.38 // /// chr1:22265362-22267478 (+) // 90.93 // p36.12 /// chr17:21198686-21199199 (+) // 90.02 // p11.2 /// chr19:36293726-36294378 (+) // 92.92 // q13.12 /// chr3:117901764-117902276 (+) // 91.65 // q13.32 /// chr5:59225574-59226088 (-) // 87.66 // q12.1	ribosomal protein S12	Rps12	chr1p12	full length	ENSRNOG00000016411 /// ENSRNOG00000020093 /// ENSRNOG00000032045 /// ENSRNOG00000033913	65139	D3ZHB3 /// D3ZJZ4 /// D3ZMD2 /// P63324 /// Q6PDW1	---	---	NP_113897	NM_031709	---	---	---	---	---	---	0006412 // translation // inferred from electronic annotation /// 0006414 // translational elongation // not recorded	0005622 // intracellular // inferred from electronic annotation /// 0005737 // cytoplasm // inferred from electronic annotation /// 0005829 // cytosol // not recorded /// 0005840 // ribosome // inferred from electronic annotation /// 0022627 // cytosolic small ribosomal subunit // inferred from direct assay /// 0022627 // cytosolic small ribosomal subunit // not recorded /// 0030529 // ribonucleo…	0003735 // structural constituent of ribosome // inferred from electronic annotation	---
1367641_at	13.1057	13.0507	13.1124	13.1943	12.9863	13.0745	12.9209	12.9499	P	P	P	P	P	P	P	P	Rat Expression Array 230 2.0	Rattus norvegicus	2011-06-09	Consensus sequence	GenBank	Rn.6059.1	gb:NM_017050.1 /DB_XREF=gi:8394327 /GEN=Sod1 /FEA=FLmRNA /CNT=54 /TID=Rn.6059.1 /TIER=FL+Stack /STK=31 /UG=Rn.6059 /LL=24786 /DEF=Rattus norvegicus Superoxide dismutase 1, soluble (Sod1), mRNA. /PROD=superoxide dismutase 1, soluble /FL=gb:NM_017050.1 gb:M21060.1 gb:M25157.1	NM_017050	Rn.6059	Rn.6059	November 2004 (Baylor College of Medicine HGSC Rnor3.4)	chr11:29810762-29816342 (-) // 97.61 // p14.1	superoxide dismutase 1, soluble	Sod1	chr11q11	full length	ENSRNOG00000002115	24786	P07632 /// Q6LDS4 /// Q6PEC5	EC:1.15.1.1	---	NP_058746	NM_017050	---	---	---	---	---	---	0000187 // activation of MAPK activity // inferred from electronic annotation /// 0000187 // activation of MAPK activity // not recorded /// 0000187 // activation of MAPK activity // inferred from sequence or structural similarity /// 0000302 // response to reactive oxygen species // not recorded /// 0000302 // response to reactive oxygen species // inferred from electronic annotation /// 0000303…	0005576 // extracellular region // not recorded /// 0005615 // extracellular space // inferred from electronic annotation /// 0005615 // extracellular space // not recorded /// 0005615 // extracellular space // inferred from sequence or structural similarity /// 0005634 // nucleus // inferred from direct assay /// 0005634 // nucleus // not recorded /// 0005634 // nucleus // inferred from electron…	0004784 // superoxide dismutase activity // inferred from direct assay /// 0004784 // superoxide dismutase activity // not recorded /// 0004784 // superoxide dismutase activity // inferred from electronic annotation /// 0004784 // superoxide dismutase activity // inferred from sequence or structural similarity /// 0005507 // copper ion binding // inferred from mutant phenotype /// 0005507 // copp…	Oxidative_Stress // GenMAPP
1367642_at	11.0624	10.9574	11.1797	11.1774	11.4325	11.5388	11.4658	11.4312	P	P	P	P	P	P	P	P	Rat Expression Array 230 2.0	Rattus norvegicus	2011-06-09	Consensus sequence	GenBank	Rn.3766.1	gb:NM_053752.1 /DB_XREF=gi:16758585 /GEN=Suclg1 /FEA=FLmRNA /CNT=49 /TID=Rn.3766.1 /TIER=FL+Stack /STK=31 /UG=Rn.3766 /LL=114597 /DEF=Rattus norvegicus succinate-CoA ligase, GDP-forming, alpha subunit (Suclg1), mRNA. /PROD=succinate-CoA ligase, GDP-forming, alphasubunit /FL=gb:NM_053752.1 gb:J03621.1	NM_053752	Rn.3766	Rn.3766	November 2004 (Baylor College of Medicine HGSC Rnor3.4)	chr4:106572165-106601505 (+) // 72.44 // q24	succinate-CoA ligase, alpha subunit	Suclg1	chr4q33	full length	ENSRNOG00000005587	114597	P13086 /// P70631	EC:6.2.1.4	---	NP_446204	NM_053752	---	---	---	---	---	---	0006099 // tricarboxylic acid cycle // inferred from direct assay /// 0006099 // tricarboxylic acid cycle // inferred from electronic annotation /// 0006104 // succinyl-CoA metabolic process // inferred from direct assay /// 0006105 // succinate metabolic process // inferred from direct assay /// 0008152 // metabolic process // inferred from electronic annotation	0005739 // mitochondrion // inferred from direct assay /// 0005739 // mitochondrion // not recorded /// 0005739 // mitochondrion // inferred from electronic annotation /// 0005743 // mitochondrial inner membrane // inferred from electronic annotation /// 0005743 // mitochondrial inner membrane // not recorded /// 0045244 // succinate-CoA ligase complex (GDP-forming) // inferred from direct assay	0000166 // nucleotide binding // inferred from electronic annotation /// 0003824 // catalytic activity // inferred from electronic annotation /// 0003878 // ATP citrate synthase activity // inferred from electronic annotation /// 0004775 // succinate-CoA ligase (ADP-forming) activity // inferred from direct assay /// 0004775 // succinate-CoA ligase (ADP-forming) activity // inferred from electron…	Krebs-TCA_Cycle // GenMAPP
1367643_at	13.5942	13.6564	13.8188	13.7722	11.5563	11.7107	11.742	11.6555	P	P	P	P	P	P	P	P	Rat Expression Array 230 2.0	Rattus norvegicus	2011-06-09	Consensus sequence	GenBank	Rn.2269.1	gb:NM_012783.1 /DB_XREF=gi:7709991 /GEN=Bsg /FEA=FLmRNA /CNT=42 /TID=Rn.2269.1 /TIER=FL+Stack /STK=31 /UG=Rn.2269 /LL=25246 /DEF=Rattus norvegicus Basigin (Ox47 antigen or CE-9) (EMMPRIN in human) (neurothelin, HT7 or 5A11 in avian) (Bsg), mRNA. /PROD=basigin (Ox47 antigen or CE-9) (EMMPRIN inhuman) (neurothelin, HT7 or 5A11 in avian) /FL=gb:NM_012783.1	NM_012783	Rn.2269	Rn.2269	November 2004 (Baylor College of Medicine HGSC Rnor3.4)	chr7:11507913-11515056 (-) // 84.07 // p21.3	basigin	Bsg	chr7q11	full length	ENSRNOG00000008414	25246	P26453 /// Q6GT74	---	---	NP_001103352 /// NP_036915	NM_001109882 /// NM_012783	---	---	---	---	---	---	0007566 // embryo implantation // inferred from expression pattern /// 0042475 // odontogenesis of dentine-containing tooth // inferred from expression pattern /// 0043434 // response to peptide hormone stimulus // inferred from expression pattern /// 0046689 // response to mercury ion // inferred from expression pattern /// 0046697 // decidualization // inferred from expression pattern /// 00515…	0000139 // Golgi membrane // not recorded /// 0005739 // mitochondrion // inferred from direct assay /// 0005886 // plasma membrane // not recorded /// 0005886 // plasma membrane // inferred from electronic annotation /// 0016020 // membrane // inferred from electronic annotation /// 0016021 // integral to membrane // inferred from electronic annotation /// 0042383 // sarcolemma // inferred from …	0005515 // protein binding // inferred from physical interaction /// 0005515 // protein binding // not recorded /// 0005515 // protein binding // inferred from electronic annotation /// 0005529 // sugar binding // inferred from electronic annotation /// 0005537 // mannose binding // inferred from electronic annotation /// 0015129 // lactate transmembrane transporter activity // not recorded	Matrix_Metalloproteinases // GenMAPP
1367644_at	9.75941	10.0405	10.0376	9.72484	8.9779	9.12864	9.06515	9.13413	P	P	P	P	P	P	P	P	Rat Expression Array 230 2.0	Rattus norvegicus	2011-06-09	Consensus sequence	GenBank	Rn.3313.1	gb:L01115.1 /DB_XREF=gi:202712 /FEA=FLmRNA /CNT=39 /TID=Rn.3313.1 /TIER=FL+Stack /STK=31 /UG=Rn.3313 /LL=25289 /UG_GENE=Adcy6 /DEF=Rattus norvegicus adenylyl cyclase type VI mRNA, complete cds. /PROD=adenylyl cyclase type VI /FL=gb:M96160.1 gb:L01115.1 gb:NM_012821.1	L01115	Rn.3313	Rn.3313	November 2004 (Baylor College of Medicine HGSC Rnor3.4)	chr7:137339932-137354809 (-) // 93.91 // q33	adenylate cyclase 6	Adcy6	chr7q36	full length	ENSRNOG00000011587	25289	Q03343	EC:4.6.1.1	---	NP_036953	NM_012821	---	---	---	---	---	---	0006171 // cAMP biosynthetic process // inferred from direct assay /// 0006171 // cAMP biosynthetic process // inferred from mutant phenotype /// 0006171 // cAMP biosynthetic process // inferred from electronic annotation /// 0007189 // activation of adenylate cyclase activity by G-protein signaling pathway // not recorded /// 0007193 // inhibition of adenylate cyclase activity by G-protein signa…	0005624 // membrane fraction // inferred from direct assay /// 0005768 // endosome // inferred from direct assay /// 0005886 // plasma membrane // inferred from direct assay /// 0005886 // plasma membrane // not recorded /// 0016020 // membrane // inferred from electronic annotation /// 0016021 // integral to membrane // inferred from electronic annotation /// 0031528 // microvillus membrane // i…	0000166 // nucleotide binding // inferred from electronic annotation /// 0004016 // adenylate cyclase activity // inferred from direct assay /// 0004016 // adenylate cyclase activity // inferred from mutant phenotype /// 0004016 // adenylate cyclase activity // inferred from electronic annotation /// 0005102 // receptor binding // inferred from physical interaction /// 0005515 // protein binding …	Calcium_regulation_in_cardiac_cells // GenMAPP /// G_Protein_Signaling // GenMAPP /// Smooth_muscle_contraction // GenMAPP
1367645_at	14.7058	14.706	14.5559	14.8028	13.9378	14.0599	13.8992	13.9473	P	P	P	P	P	P	P	P	Rat Expression Array 230 2.0	Rattus norvegicus	2011-06-09	Consensus sequence	GenBank	Rn.6920.1	gb:NM_017152.1 /DB_XREF=gi:8394214 /GEN=Rps17 /FEA=FLmRNA /CNT=37 /TID=Rn.6920.1 /TIER=FL+Stack /STK=31 /UG=Rn.6920 /LL=29286 /DEF=Rattus norvegicus ribosomal protein S17 (Rps17), mRNA. /PROD=ribosomal protein S17 /FL=gb:NM_017152.1 gb:K02933.1	NM_017152	Rn.6920	Rn.6920	November 2004 (Baylor College of Medicine HGSC Rnor3.4)	chr1:137552231-137554614 (-) // 93.42 // q12	ribosomal protein S17	Rps17	chr1q31	full length	ENSRNOG00000019106 /// ENSRNOG00000028690	29286	D3ZFA8 /// P04644	---	---	NP_058848	NM_017152	---	---	---	---	---	---	0006364 // rRNA processing // not recorded /// 0006412 // translation // inferred from electronic annotation /// 0006414 // translational elongation // not recorded /// 0034101 // erythrocyte homeostasis // not recorded /// 0042274 // ribosomal small subunit biogenesis // not recorded	0005622 // intracellular // inferred from electronic annotation /// 0005829 // cytosol // not recorded /// 0005840 // ribosome // inferred from electronic annotation /// 0022627 // cytosolic small ribosomal subunit // inferred from direct assay /// 0022627 // cytosolic small ribosomal subunit // not recorded /// 0030529 // ribonucleoprotein complex // inferred from electronic annotation	0003735 // structural constituent of ribosome // inferred from electronic annotation	Ribosomal_Proteins // GenMAPP
1367646_at	12.4845	12.5868	12.5039	12.5029	10.802	10.9358	10.9432	10.9046	P	P	P	P	P	P	P	P	Rat Expression Array 230 2.0	Rattus norvegicus	2011-06-09	Consensus sequence	GenBank	Rn.6171.1	gb:NM_022597.1 /DB_XREF=gi:12018261 /GEN=Ctsb /FEA=FLmRNA /CNT=52 /TID=Rn.6171.1 /TIER=FL+Stack /STK=31 /UG=Rn.6171 /LL=64529 /DEF=Rattus norvegicus cathepsin B (Ctsb), mRNA. /PROD=cathepsin B /FL=gb:NM_022597.1	NM_022597	Rn.6171	Rn.100909	November 2004 (Baylor College of Medicine HGSC Rnor3.4)	chr15:42402868-42423700 (+) // 96.44 // q15.1	cathepsin B	Ctsb	chr15p12	full length	ENSRNOG00000010331	64529	P00787 /// Q6IN22	EC:3.4.22.1	---	NP_072119	NM_022597	---	---	---	---	---	---	0006508 // proteolysis // inferred from direct assay /// 0006508 // proteolysis // inferred from expression pattern /// 0006508 // proteolysis // inferred from mutant phenotype /// 0006508 // proteolysis // not recorded /// 0006508 // proteolysis // traceable author statement /// 0006508 // proteolysis // inferred from electronic annotation /// 0006914 // autophagy // inferred from expression pat…	0005576 // extracellular region // inferred from direct assay /// 0005615 // extracellular space // inferred from direct assay /// 0005625 // soluble fraction // inferred from direct assay /// 0005737 // cytoplasm // inferred from direct assay /// 0005739 // mitochondrion // inferred from direct assay /// 0005739 // mitochondrion // not recorded /// 0005739 // mitochondrion // inferred from elect…	0004175 // endopeptidase activity // inferred from direct assay /// 0004175 // endopeptidase activity // inferred from mutant phenotype /// 0004197 // cysteine-type endopeptidase activity // inferred from direct assay /// 0004197 // cysteine-type endopeptidase activity // not recorded /// 0004197 // cysteine-type endopeptidase activity // inferred from electronic annotation /// 0005515 // protein…	---
1367647_at	1.90009	1.97557	2.04147	2.09948	2.00088	2.14642	2.09849	1.95867	A	A	A	A	A	A	A	A	Rat Expression Array 230 2.0	Rattus norvegicus	2011-06-09	Consensus sequence	GenBank	Rn.1419.1	gb:NM_022519.1 /DB_XREF=gi:11968099 /GEN=Serpina1 /FEA=FLmRNA /CNT=34 /TID=Rn.1419.1 /TIER=FL+Stack /STK=31 /UG=Rn.1419 /LL=24648 /DEF=Rattus norvegicus serine (or cysteine) proteinase inhibitor, clade A (alpha-1 antiproteinase, antitrypsin), member 1 (Serpina1), mRNA. /PROD=serine protease inhibitor alpha 1 /FL=gb:NM_022519.1 gb:M32247.1	NM_022519	Rn.1419	Rn.1419	November 2004 (Baylor College of Medicine HGSC Rnor3.4)	chr6:127998616-128008672 (-) // 99.86 // q22.33	serpin peptidase inhibitor, clade A (alpha-1 antiproteinase, antitrypsin), member 1	Serpina1	chr6q32	full length	ENSRNOG00000032669	24648	P17475	---	---	NP_071964	NM_022519	---	---	---	---	---	---	0001666 // response to hypoxia // inferred from expression pattern /// 0006953 // acute-phase response // inferred from electronic annotation /// 0006954 // inflammatory response // inferred from expression pattern /// 0010035 // response to inorganic substance // inferred from expression pattern /// 0010288 // response to lead ion // inferred from direct assay /// 0014070 // response to organic …	0005576 // extracellular region // inferred from electronic annotation /// 0005576 // extracellular region // not recorded /// 0005615 // extracellular space // inferred from direct assay /// 0005615 // extracellular space // not recorded /// 0005615 // extracellular space // inferred from electronic annotation /// 0031093 // platelet alpha granule lumen // not recorded	0002020 // protease binding // inferred from electronic annotation /// 0002020 // protease binding // not recorded /// 0004866 // endopeptidase inhibitor activity // inferred from direct assay /// 0004867 // serine-type endopeptidase inhibitor activity // inferred from electronic annotation /// 0004867 // serine-type endopeptidase inhibitor activity // not recorded /// 0005515 // protein binding …	---
1367648_at	12.4483	12.6522	12.9377	12.5402	2.46446	2.23161	2.45561	2.60831	P	P	P	P	A	A	A	A	Rat Expression Array 230 2.0	Rattus norvegicus	2011-06-09	Consensus sequence	GenBank	Rn.6813.1	gb:NM_013122.1 /DB_XREF=gi:6981081 /GEN=Igfbp2 /FEA=FLmRNA /CNT=47 /TID=Rn.6813.1 /TIER=FL+Stack /STK=31 /UG=Rn.6813 /LL=25662 /DEF=Rattus norvegicus Insulin-like growth factor binding protein 2 (Igfbp2), mRNA. /PROD=insulin-like growth factor binding protein 2 /FL=gb:NM_013122.1 gb:M31672.1 gb:J04486.1	NM_013122	Rn.6813	Rn.6813	November 2004 (Baylor College of Medicine HGSC Rnor3.4)	chr15:32531770-32533532 (+) // 51.07 // q13.3 /// chr9:71966895-71994206 (+) // 44.61 // q21.11	insulin-like growth factor binding protein 2	Igfbp2	chr9q33	full length	ENSRNOG00000016957	25662	P12843 /// Q6LDF9 /// Q6LDG0	---	---	NP_037254	NM_013122	---	---	---	---	---	---	0001558 // regulation of cell growth // inferred from electronic annotation /// 0006950 // response to stress // inferred from expression pattern /// 0007165 // signal transduction // inferred from expression pattern /// 0007275 // multicellular organismal development // inferred from electronic annotation /// 0007565 // female pregnancy // inferred from expression pattern /// 0007568 // aging //…	0005576 // extracellular region // inferred from direct assay /// 0005576 // extracellular region // inferred from electronic annotation /// 0005615 // extracellular space // inferred from direct assay /// 0005615 // extracellular space // inferred from mutant phenotype /// 0005615 // extracellular space // not recorded /// 0005615 // extracellular space // inferred from electronic annotation ///…	0005515 // protein binding // not recorded /// 0005515 // protein binding // inferred from electronic annotation /// 0005520 // insulin-like growth factor binding // not recorded /// 0005520 // insulin-like growth factor binding // inferred from electronic annotation /// 0019838 // growth factor binding // inferred from electronic annotation /// 0031994 // insulin-like growth factor I binding // …	Smooth_muscle_contraction // GenMAPP
1367649_at	3.41845	3.23759	3.21235	3.23727	3.40263	3.39895	3.54217	3.44708	A	M	P	M	M	M	P	M	Rat Expression Array 230 2.0	Rattus norvegicus	2011-06-09	Consensus sequence	GenBank	Rn.18947.1	gb:NM_130829.1 /DB_XREF=gi:18677764 /GEN=Palm /FEA=FLmRNA /CNT=32 /TID=Rn.18947.1 /TIER=FL+Stack /STK=31 /UG=Rn.18947 /DEF=Rattus norvegicus paralemmin (Palm), mRNA. /PROD=paralemmin /FL=gb:NM_130829.1 gb:AB058889.1	NM_130829	Rn.18947	Rn.198776	November 2004 (Baylor College of Medicine HGSC Rnor3.4)	chr7:11399528-11425964 (-) // 98.06 // p21.3	paralemmin	Palm	chr7q11	full length	ENSRNOG00000009760	170673	D4ADS2 /// Q920Q0	---	---	NP_570842	NM_130829	---	---	---	---	---	---	0007010 // cytoskeleton organization // inferred from electronic annotation /// 0007010 // cytoskeleton organization // not recorded /// 0007194 // negative regulation of adenylate cyclase activity // inferred from electronic annotation /// 0007194 // negative regulation of adenylate cyclase activity // not recorded /// 0008104 // protein localization // inferred from electronic annotation /// 00…	0005737 // cytoplasm // inferred from electronic annotation /// 0005737 // cytoplasm // not recorded /// 0005886 // plasma membrane // inferred from electronic annotation /// 0005886 // plasma membrane // not recorded /// 0009898 // internal side of plasma membrane // traceable author statement /// 0016020 // membrane // inferred from electronic annotation	0031750 // D3 dopamine receptor binding // inferred from electronic annotation /// 0031750 // D3 dopamine receptor binding // not recorded	---
1367650_at	7.77469	7.44369	8.12175	8.02272	10.5723	10.7747	10.6966	10.4801	P	P	P	P	P	P	P	P	Rat Expression Array 230 2.0	Rattus norvegicus	2011-06-09	Consensus sequence	GenBank	Rn.1256.1	gb:NM_053582.1 /DB_XREF=gi:16758353 /GEN=gis5 /FEA=FLmRNA /CNT=39 /TID=Rn.1256.1 /TIER=FL+Stack /STK=30 /UG=Rn.1256 /LL=94174 /DEF=Rattus norvegicus glucocorticoid-inducible protein (gis5), mRNA. /PROD=glucocorticoid-inducible protein /FL=gb:AB050717.1 gb:NM_053582.1	NM_053582	Rn.1256	Rn.1256	November 2004 (Baylor College of Medicine HGSC Rnor3.4)	chr5:149198273-149207653 (-) // 97.11 // q32	tubulointerstitial nephritis antigen-like 1	Tinagl1	chr5q36	full length	ENSRNOG00000013179	94174	Q4V8N0 /// Q9EQT5	---	---	NP_446034	NM_053582	---	---	---	---	---	---	0006508 // proteolysis // inferred from electronic annotation /// 0006955 // immune response // inferred from electronic annotation	0005576 // extracellular region // inferred from electronic annotation /// 0005737 // cytoplasm // inferred from electronic annotation /// 0005737 // cytoplasm // not recorded /// 0031012 // extracellular matrix // not recorded	0004197 // cysteine-type endopeptidase activity // inferred from electronic annotation /// 0005044 // scavenger receptor activity // inferred from electronic annotation /// 0008234 // cysteine-type peptidase activity // inferred from electronic annotation /// 0030247 // polysaccharide binding // inferred from electronic annotation /// 0043236 // laminin binding // inferred from electronic annotat…	---
1367651_at	11.3324	11.4554	11.6654	11.3413	9.99653	10.0579	10.085	10.1829	P	P	P	P	P	P	P	P	Rat Expression Array 230 2.0	Rattus norvegicus	2011-06-09	Consensus sequence	GenBank	Rn.11085.1	gb:NM_134334.1 /DB_XREF=gi:19705440 /GEN=Ctsd /FEA=FLmRNA /CNT=45 /TID=Rn.11085.1 /TIER=FL+Stack /STK=30 /UG=Rn.11085 /LL=171293 /DEF=Rattus norvegicus cathepsin D (Ctsd), mRNA. /PROD=cathepsin D /FL=gb:NM_134334.1	NM_134334	Rn.11085	Rn.11085	November 2004 (Baylor College of Medicine HGSC Rnor3.4)	chr1:202619668-202631506 (-) // 98.29 // q32.1	cathepsin D	Ctsd	chr1q41	full length	ENSRNOG00000020206	171293	D3ZGP8 /// P24268 /// Q6P6T6	EC:3.4.23.5	---	NP_599161	NM_134334	---	---	---	---	---	---	0000045 // autophagic vacuole assembly // not recorded /// 0006508 // proteolysis // inferred from direct assay /// 0006508 // proteolysis // inferred from electronic annotation /// 0006914 // autophagy // inferred from expression pattern /// 0008152 // metabolic process // not recorded /// 0060441 // epithelial tube branching involved in lung morphogenesis // not recorded	0005615 // extracellular space // not recorded /// 0005625 // soluble fraction // inferred from direct assay /// 0005739 // mitochondrion // not recorded /// 0005764 // lysosome // inferred from direct assay /// 0005764 // lysosome // not recorded /// 0005764 // lysosome // inferred from electronic annotation /// 0031012 // extracellular matrix // not recorded /// 0042470 // melanosome // inferre…	0004175 // endopeptidase activity // inferred from direct assay /// 0004175 // endopeptidase activity // inferred from mutant phenotype /// 0004190 // aspartic-type endopeptidase activity // inferred from electronic annotation /// 0008233 // peptidase activity // inferred from electronic annotation /// 0008233 // peptidase activity // not recorded /// 0016787 // hydrolase activity // inferred fro…	---
1367652_at	2.13277	2.18953	2.06261	2.31372	2.21936	2.25298	2.1792	2.0681	A	A	A	A	A	A	A	A	Rat Expression Array 230 2.0	Rattus norvegicus	2011-06-09	Consensus sequence	GenBank	Rn.26369.1	gb:AI713966 /DB_XREF=gi:5017766 /DB_XREF=UI-R-AB1-yt-h-04-0-UI.s1 /CLONE=UI-R-AB1-yt-h-04-0-UI /FEA=FLmRNA /CNT=56 /TID=Rn.26369.1 /TIER=Stack /STK=7 /UG=Rn.26369 /LL=24484 /UG_GENE=Igfbp3 /UG_TITLE=Insulin-like growth factor-binding protein (IGF-BP3) /FL=gb:M33300.1 gb:M31837.1 gb:NM_012588.1	AI713966	Rn.26369	Rn.26369	November 2004 (Baylor College of Medicine HGSC Rnor3.4)	chr14:87959145-87967091 (-) // 91.97 // q31.3	insulin-like growth factor binding protein 3	Igfbp3	chr14q21	full length	ENSRNOG00000008645	24484	A1A5Q9 /// P15473	---	---	NP_036720	NM_012588	---	---	---	---	---	---	0001558 // regulation of cell growth // inferred from electronic annotation /// 0001649 // osteoblast differentiation // inferred from electronic annotation /// 0001649 // osteoblast differentiation // not recorded /// 0001933 // negative regulation of protein phosphorylation // not recorded /// 0006468 // protein phosphorylation // not recorded /// 0008285 // negative regulation of cell prolifer…	0005576 // extracellular region // inferred from electronic annotation /// 0005615 // extracellular space // inferred from direct assay /// 0005615 // extracellular space // not recorded /// 0005615 // extracellular space // inferred from electronic annotation /// 0005625 // soluble fraction // inferred from direct assay /// 0005634 // nucleus // not recorded /// 0016942 // insulin-like growth fa…	0005515 // protein binding // inferred from physical interaction /// 0005515 // protein binding // not recorded /// 0005520 // insulin-like growth factor binding // inferred from electronic annotation /// 0005520 // insulin-like growth factor binding // not recorded /// 0005520 // insulin-like growth factor binding // traceable author statement /// 0008160 // protein tyrosine phosphatase activato…	Smooth_muscle_contraction // GenMAPP
1367653_a_at	12.6337	12.6068	12.6534	12.6934	12.7513	12.8356	12.7772	12.8104	P	P	P	P	P	P	P	P	Rat Expression Array 230 2.0	Rattus norvegicus	2011-06-09	Consensus sequence	GenBank	Rn.1504.1	gb:NM_033235.1 /DB_XREF=gi:15100178 /GEN=Mdhl /FEA=FLmRNA /CNT=42 /TID=Rn.1504.1 /TIER=FL+Stack /STK=29 /UG=Rn.1504 /LL=24551 /DEF=Rattus norvegicus Malate dehydrogenase-like enzyme (Mdhl), mRNA. /PROD=malate dehydrogenase-like enzyme /FL=gb:AF093773.1 gb:NM_033235.1	NM_033235	Rn.1504	Rn.13492	November 2004 (Baylor College of Medicine HGSC Rnor3.4)	chr14:102258853-102273819 (-) // 97.07 // q32.31	malate dehydrogenase 1, NAD (soluble)	Mdh1	chr14q22	full length	ENSRNOG00000008103	24551	O88989	EC:1.1.1.37	---	NP_150238	NM_033235	---	---	---	---	---	---	0005975 // carbohydrate metabolic process // inferred from electronic annotation /// 0006096 // glycolysis // inferred from electronic annotation /// 0006099 // tricarboxylic acid cycle // inferred from electronic annotation /// 0006107 // oxaloacetate metabolic process // inferred from direct assay /// 0006108 // malate metabolic process // inferred from direct assay /// 0006108 // malate metabo…	0005625 // soluble fraction // inferred from direct assay /// 0005737 // cytoplasm // inferred from electronic annotation /// 0005739 // mitochondrion // inferred from electronic annotation /// 0005739 // mitochondrion // not recorded /// 0005829 // cytosol // not recorded	0003824 // catalytic activity // inferred from electronic annotation /// 0005488 // binding // inferred from electronic annotation /// 0016491 // oxidoreductase activity // inferred from electronic annotation /// 0016615 // malate dehydrogenase activity // inferred from direct assay /// 0016615 // malate dehydrogenase activity // inferred from electronic annotation /// 0016616 // oxidoreductase a…	Glycolysis_and_Gluconeogenesis // GenMAPP /// Krebs-TCA_Cycle // GenMAPP
1367654_at	12.6057	12.7673	12.6828	12.4631	11.4956	11.3689	11.5632	11.583	P	P	P	P	P	P	P	P	Rat Expression Array 230 2.0	Rattus norvegicus	2011-06-09	Consensus sequence	GenBank	Rn.8633.1	gb:NM_031819.1 /DB_XREF=gi:13929167 /GEN=Fat /FEA=FLmRNA /CNT=38 /TID=Rn.8633.1 /TIER=FL+Stack /STK=29 /UG=Rn.8633 /LL=83720 /DEF=Rattus norvegicus FAT tumor suppressor (Drosophila) homolog (Fat), mRNA. /PROD=FAT tumor suppressor (Drosophila) homolog /FL=gb:NM_031819.1 gb:AF100960.1	NM_031819	Rn.8633	Rn.8633	November 2004 (Baylor College of Medicine HGSC Rnor3.4)	chr16:50472062-50591399 (-) // 99.7 // q12.1	FAT tumor suppressor homolog 1 (Drosophila)	Fat1	chr16q11	full length	ENSRNOG00000030954	83720	A7ISQ3 /// Q63401 /// Q9JIV8 /// Q9WU10	---	---	NP_114007	NM_031819	---	---	---	---	---	---	0007015 // actin filament organization // not recorded /// 0007155 // cell adhesion // inferred from electronic annotation /// 0007156 // homophilic cell adhesion // inferred from electronic annotation /// 0007163 // establishment or maintenance of cell polarity // not recorded /// 0016337 // cell-cell adhesion // not recorded	0005886 // plasma membrane // inferred from electronic annotation /// 0016020 // membrane // inferred from electronic annotation /// 0016021 // integral to membrane // inferred from electronic annotation /// 0030027 // lamellipodium // not recorded /// 0030054 // cell junction // not recorded /// 0030175 // filopodium // not recorded	0005509 // calcium ion binding // inferred from electronic annotation /// 0005515 // protein binding // not recorded	---
1367655_at	11.6215	11.4154	11.8587	11.7724	11.05	10.9334	11.0493	11.196	P	P	P	P	P	P	P	P	Rat Expression Array 230 2.0	Rattus norvegicus	2011-06-09	Consensus sequence	GenBank	Rn.5983.1	gb:NM_021261.1 /DB_XREF=gi:10863918 /GEN=Tmsb10 /FEA=FLmRNA /CNT=37 /TID=Rn.5983.1 /TIER=FL+Stack /STK=28 /UG=Rn.5983 /LL=50665 /DEF=Rattus norvegicus thymosin, beta 10 (Tmsb10), mRNA. /PROD=thymosin beta-10 /FL=gb:NM_021261.1 gb:M58405.1 gb:M58404.1 gb:M17698.1	NM_021261	Rn.5983	Rn.5983	November 2004 (Baylor College of Medicine HGSC Rnor3.4)	chr4:106286035-106286852 (-) // 88.39 // q24	thymosin, beta 10	Tmsb10	chr4q33	full length	ENSRNOG00000042499	50665	P63312	---	---	NP_067084	NM_021261	---	---	---	---	---	---	0007010 // cytoskeleton organization // inferred from electronic annotation /// 0007286 // spermatid development // traceable author statement /// 0030036 // actin cytoskeleton organization // traceable author statement /// 0030036 // actin cytoskeleton organization // inferred from electronic annotation /// 0042989 // sequestering of actin monomers // inferred from electronic annotation	0005737 // cytoplasm // inferred from electronic annotation /// 0005856 // cytoskeleton // inferred from electronic annotation	0003779 // actin binding // inferred from electronic annotation /// 0003785 // actin monomer binding // traceable author statement	---
1367656_at	10.2126	10.1302	10.5714	10.295	11.1197	11.1614	11.3567	11.2176	P	P	P	P	P	P	P	P	Rat Expression Array 230 2.0	Rattus norvegicus	2011-06-09	Consensus sequence	GenBank	Rn.3846.1	gb:NM_053532.1 /DB_XREF=gi:16758297 /GEN=Psmb7 /FEA=FLmRNA /CNT=44 /TID=Rn.3846.1 /TIER=FL+Stack /STK=28 /UG=Rn.3846 /LL=85492 /DEF=Rattus norvegicus proteasome (prosome, macropain) subunit, beta type, 7 (Psmb7), mRNA. /PROD=proteasome (prosome, macropain) subunit, betatype, 7 /FL=gb:AF285103.1 gb:NM_053532.1	NM_053532	Rn.3846	Rn.3846	November 2004 (Baylor College of Medicine HGSC Rnor3.4)	chr3:18384200-18451208 (-) // 97.48 // p24.3	proteasome (prosome, macropain) subunit, beta type 7	Psmb7	chr3q11	full length	ENSRNOG00000011732	85492	Q9JHW0	EC:3.4.25.1	---	NP_445984	NM_053532	---	---	---	---	---	---	0031145 // anaphase-promoting complex-dependent proteasomal ubiquitin-dependent protein catabolic process // not recorded /// 0051436 // negative regulation of ubiquitin-protein ligase activity involved in mitotic cell cycle // not recorded /// 0051437 // positive regulation of ubiquitin-protein ligase activity involved in mitotic cell cycle // not recorded /// 0051603 // proteolysis involved in …	0000502 // proteasome complex // inferred from electronic annotation /// 0005634 // nucleus // inferred from electronic annotation /// 0005737 // cytoplasm // inferred from electronic annotation /// 0005839 // proteasome core complex // inferred from electronic annotation	0004175 // endopeptidase activity // inferred from electronic annotation /// 0004298 // threonine-type endopeptidase activity // inferred from electronic annotation /// 0008233 // peptidase activity // inferred from electronic annotation /// 0016787 // hydrolase activity // inferred from electronic annotation	Proteasome_Degradation // GenMAPP
1367657_at	12.6267	12.6962	12.7483	12.6486	12.6986	12.7217	12.701	12.7621	P	P	P	P	P	P	P	P	Rat Expression Array 230 2.0	Rattus norvegicus	2011-06-09	Consensus sequence	GenBank	Rn.1000.1	gb:NM_017258.1 /DB_XREF=gi:12025533 /GEN=Btg1 /FEA=FLmRNA /CNT=34 /TID=Rn.1000.1 /TIER=FL+Stack /STK=28 /UG=Rn.1000 /LL=29618 /DEF=Rattus norvegicus B-cell translocation gene 1, anti-proliferative (Btg1), mRNA. /PROD=B-cell translocation gene 1, anti-proliferative /FL=gb:L26268.1 gb:NM_017258.1	NM_017258	Rn.1000	Rn.1000	November 2004 (Baylor College of Medicine HGSC Rnor3.4)	chr7:34029292-34031559 (+) // 99.32 // p14.3	B-cell translocation gene 1, anti-proliferative	Btg1	chr7q13	full length	ENSRNOG00000004284	29618	Q63073	---	---	NP_058954	NM_017258	---	---	---	---	---	---	0006479 // protein methylation // inferred from electronic annotation /// 0006479 // protein methylation // not recorded /// 0006979 // response to oxidative stress // inferred from expression pattern /// 0007283 // spermatogenesis // inferred from expression pattern /// 0007286 // spermatid development // non-traceable author statement /// 0008285 // negative regulation of cell proliferation // …	0005634 // nucleus // inferred from direct assay /// 0005634 // nucleus // not recorded /// 0005634 // nucleus // inferred from sequence or structural similarity /// 0005634 // nucleus // inferred from electronic annotation /// 0005737 // cytoplasm // not recorded /// 0005737 // cytoplasm // inferred from sequence or structural similarity /// 0005737 // cytoplasm // inferred from electronic annot…	0005515 // protein binding // inferred from physical interaction /// 0005515 // protein binding // not recorded /// 0005515 // protein binding // inferred from electronic annotation /// 0019899 // enzyme binding // not recorded /// 0019899 // enzyme binding // inferred from sequence or structural similarity /// 0019899 // enzyme binding // inferred from electronic annotation	---
1367658_at	2.17026	1.99298	2.20623	1.97177	3.99404	3.77106	4.00476	3.98371	A	A	A	A	P	P	P	P	Rat Expression Array 230 2.0	Rattus norvegicus	2011-06-09	Consensus sequence	GenBank	Rn.42876.1	gb:NM_021676.1 /DB_XREF=gi:11067398 /GEN=Shank3 /FEA=FLmRNA /CNT=32 /TID=Rn.42876.1 /TIER=FL+Stack /STK=28 /UG=Rn.42876 /LL=59312 /DEF=Rattus norvegicus SH3ankyrin domain gene 3 (Shank3), mRNA. /PROD=Shank postsynaptic density protein 3a /FL=gb:NM_021676.1 gb:AF133301.1	NM_021676	Rn.42876	Rn.42876	November 2004 (Baylor College of Medicine HGSC Rnor3.4)	chr7:127817023-127877872 (+) // 94.82 // q32.1	SH3 and multiple ankyrin repeat domains 3	Shank3	chr7q34	full length	ENSRNOG00000032936	59312	D3ZHS7 /// D4ADF7 /// Q9JLU4	---	---	NP_067708	NM_021676	---	---	---	---	---	---	0000165 // MAPKKK cascade // inferred from electronic annotation /// 0000165 // MAPKKK cascade // not recorded /// 0001838 // embryonic epithelial tube formation // inferred from electronic annotation /// 0001838 // embryonic epithelial tube formation // not recorded /// 0051259 // protein oligomerization // inferred from direct assay	0005737 // cytoplasm // inferred from electronic annotation /// 0005886 // plasma membrane // inferred from electronic annotation /// 0014069 // postsynaptic density // inferred from direct assay /// 0014069 // postsynaptic density // inferred from electronic annotation /// 0016020 // membrane // inferred from electronic annotation /// 0030054 // cell junction // inferred from electronic annotati…	0005515 // protein binding // inferred from direct assay /// 0005515 // protein binding // inferred from electronic annotation /// 0005515 // protein binding // inferred from physical interaction /// 0005515 // protein binding // not recorded /// 0008270 // zinc ion binding // inferred from direct assay /// 0017124 // SH3 domain binding // inferred from physical interaction /// 0017124 // SH3 dom…	---
1367659_s_at	9.40223	9.49287	9.38899	9.43767	2.37008	2.09373	2.39947	2.72947	P	P	P	P	A	A	A	A	Rat Expression Array 230 2.0	Rattus norvegicus	2011-06-09	Consensus sequence	GenBank	Rn.4005.1	gb:NM_017306.1 /DB_XREF=gi:8393242 /GEN=DCI /FEA=FLmRNA /CNT=34 /TID=Rn.4005.1 /TIER=FL+Stack /STK=28 /UG=Rn.4005 /LL=29740 /DEF=Rattus norvegicus dodecenoyl-Coenzyme A delta isomerase (3,2 trans-enoyl-Coenyme A isomerase) (DCI), mRNA. /PROD=dodecenoyl-Coenzyme A delta isomerase (3,2trans-enoyl-Coenyme A isomerase) /FL=gb:NM_017306.1 gb:M61112.1	NM_017306	Rn.4005	Rn.80835	November 2004 (Baylor College of Medicine HGSC Rnor3.4)	chr10:13682988-13697174 (+) // 99.08 // p13	dodecenoyl-Coenzyme A delta isomerase (3,2 trans-enoyl-Coenzyme A isomerase)	Dci	chr10q12	full length	ENSRNOG00000008843	29740	P23965 /// Q68G41	EC:5.3.3.8	---	NP_059002	NM_017306	---	---	---	---	---	---	0006629 // lipid metabolic process // inferred from electronic annotation /// 0006631 // fatty acid metabolic process // inferred from electronic annotation /// 0006635 // fatty acid beta-oxidation // not recorded /// 0006635 // fatty acid beta-oxidation // traceable author statement /// 0006635 // fatty acid beta-oxidation // inferred from electronic annotation /// 0008152 // metabolic process /…	0005739 // mitochondrion // inferred from direct assay /// 0005739 // mitochondrion // not recorded /// 0005739 // mitochondrion // traceable author statement /// 0005739 // mitochondrion // inferred from electronic annotation /// 0005743 // mitochondrial inner membrane // inferred from electronic annotation /// 0005743 // mitochondrial inner membrane // not recorded /// 0005759 // mitochondrial …	0003824 // catalytic activity // inferred from electronic annotation /// 0004165 // dodecenoyl-CoA delta-isomerase activity // inferred from direct assay /// 0004165 // dodecenoyl-CoA delta-isomerase activity // not recorded /// 0004165 // dodecenoyl-CoA delta-isomerase activity // inferred from electronic annotation /// 0016853 // isomerase activity // inferred from electronic annotation /// 004…	Mitochondrial_fatty_acid_betaoxidation // GenMAPP
1367660_at	2.57281	2.64471	2.46466	2.50026	2.49602	2.58283	2.60908	2.73368	A	A	A	A	A	A	A	A	Rat Expression Array 230 2.0	Rattus norvegicus	2011-06-09	Consensus sequence	GenBank	Rn.32566.1	gb:NM_024162.1 /DB_XREF=gi:13162362 /GEN=Fabp3 /FEA=FLmRNA /CNT=32 /TID=Rn.32566.1 /TIER=FL+Stack /STK=28 /UG=Rn.32566 /LL=79131 /DEF=Rattus norvegicus Fatty acid binding protein 3, muscle and heart (Fabp3), mRNA. /PROD=heart fatty acid binding protein /FL=gb:NM_024162.1 gb:M18034.1 gb:J02773.1	NM_024162	Rn.32566	Rn.32566	November 2004 (Baylor College of Medicine HGSC Rnor3.4)	chr5:149340539-149347270 (+) // 92.89 // q32	fatty acid binding protein 3, muscle and heart	Fabp3	chr5q36	full length	ENSRNOG00000012879	79131	P07483	---	---	NP_077076	NM_024162	---	---	---	---	---	---	0006631 // fatty acid metabolic process // inferred from expression pattern /// 0006635 // fatty acid beta-oxidation // non-traceable author statement /// 0006656 // phosphatidylcholine biosynthetic process // inferred from electronic annotation /// 0006656 // phosphatidylcholine biosynthetic process // not recorded /// 0006810 // transport // inferred from electronic annotation /// 0015909 // lo…	0005737 // cytoplasm // inferred from direct assay /// 0005737 // cytoplasm // inferred from electronic annotation /// 0005739 // mitochondrion // inferred from direct assay /// 0005829 // cytosol // inferred from direct assay /// 0016528 // sarcoplasm // inferred from direct assay /// 0016529 // sarcoplasmic reticulum // inferred from direct assay	0005215 // transporter activity // inferred from electronic annotation /// 0005324 // long-chain fatty acid transporter activity // inferred from physical interaction /// 0005488 // binding // inferred from electronic annotation /// 0005504 // fatty acid binding // inferred from physical interaction /// 0005504 // fatty acid binding // traceable author statement /// 0008289 // lipid binding // in…	---
1367661_at	14.8652	14.8053	14.7537	14.8939	14.17	14.2945	14.1224	14.1838	P	P	P	P	P	P	P	P	Rat Expression Array 230 2.0	Rattus norvegicus	2011-06-09	Consensus sequence	GenBank	Rn.3233.1	gb:AF140232.1 /DB_XREF=gi:13506724 /GEN=S100A6 /FEA=FLmRNA /CNT=35 /TID=Rn.3233.1 /TIER=FL+Stack /STK=27 /UG=Rn.3233 /LL=85247 /DEF=Rattus norvegicus calcium binding protein (S100A6) mRNA, complete cds. /PROD=calcium binding protein /FL=gb:NM_053485.1 gb:AF140232.1	AF140232	Rn.3233	Rn.3233	November 2004 (Baylor College of Medicine HGSC Rnor3.4)	chr2:182895550-182896306 (+) // 96.47 // q31.3	S100 calcium binding protein A6	S100a6	chr2q34	full length	ENSRNOG00000011647	85247	B2GVB1 /// P05964	---	---	NP_445937	NM_053485	---	---	---	---	---	---	---	0001726 // ruffle // inferred from electronic annotation /// 0001726 // ruffle // not recorded /// 0005634 // nucleus // inferred from electronic annotation /// 0005634 // nucleus // not recorded /// 0005635 // nuclear envelope // inferred from electronic annotation /// 0005635 // nuclear envelope // not recorded /// 0005737 // cytoplasm // inferred from electronic annotation /// 0005737 // cytop…	0005509 // calcium ion binding // inferred from direct assay /// 0005509 // calcium ion binding // not recorded /// 0005509 // calcium ion binding // inferred from sequence or structural similarity /// 0005509 // calcium ion binding // inferred from electronic annotation /// 0005515 // protein binding // not recorded /// 0005515 // protein binding // inferred from electronic annotation /// 000552…	---
1367662_at	10.6845	10.6585	10.8779	10.8266	10.9251	11.0035	10.88	10.7637	P	P	P	P	P	P	P	P	Rat Expression Array 230 2.0	Rattus norvegicus	2011-06-09	Consensus sequence	GenBank	Rn.2700.1	gb:NM_031682.1 /DB_XREF=gi:13994224 /GEN=Hsd17b10 /FEA=FLmRNA /CNT=35 /TID=Rn.2700.1 /TIER=FL+Stack /STK=27 /UG=Rn.2700 /LL=63864 /DEF=Rattus norvegicus hydroxysteroid (17-beta) dehydrogenase 10 (Hsd17b10), mRNA. /PROD=hydroxyacyl-Coenzyme A dehydrogenase, type II /FL=gb:AF069770.1 gb:NM_031682.1 gb:AF049878.1	NM_031682	Rn.2700	Rn.2700	November 2004 (Baylor College of Medicine HGSC Rnor3.4)	chrX:41489342-41491791 (+) // 98.38 // p11.4	hydroxysteroid (17-beta) dehydrogenase 10	Hsd17b10	chrXq21	full length	ENSRNOG00000003049	63864	B0BMW2 /// O70351	EC:1.1.1.178 /// EC:1.1.1.35	---	NP_113870	NM_031682	---	---	---	---	---	---	0007569 // cell aging // inferred from expression pattern /// 0008033 // tRNA processing // inferred from electronic annotation /// 0008152 // metabolic process // inferred from electronic annotation /// 0033327 // Leydig cell differentiation // inferred from expression pattern /// 0051289 // protein homotetramerization // inferred from direct assay /// 0055114 // oxidation reduction // inferred …	0005739 // mitochondrion // inferred from direct assay /// 0005739 // mitochondrion // not recorded /// 0005739 // mitochondrion // inferred from sequence or structural similarity /// 0005739 // mitochondrion // inferred from electronic annotation /// 0005743 // mitochondrial inner membrane // inferred from electronic annotation /// 0005743 // mitochondrial inner membrane // not recorded /// 0005…	0001540 // beta-amyloid binding // inferred from direct assay /// 0003824 // catalytic activity // inferred from electronic annotation /// 0003857 // 3-hydroxyacyl-CoA dehydrogenase activity // inferred from electronic annotation /// 0004303 // estradiol 17-beta-dehydrogenase activity // inferred from direct assay /// 0005488 // binding // inferred from electronic annotation /// 0005496 // steroi…	---
1367663_at	12.1007	12.1721	12.2045	12.3148	12.1342	12.2725	12.1253	12.1041	P	P	P	P	P	P	P	P	Rat Expression Array 230 2.0	Rattus norvegicus	2011-06-09	Consensus sequence	GenBank	Rn.2742.1	gb:NM_017264.1 /DB_XREF=gi:8394087 /GEN=Psme1 /FEA=FLmRNA /CNT=37 /TID=Rn.2742.1 /TIER=FL+Stack /STK=27 /UG=Rn.2742 /LL=29630 /DEF=Rattus norvegicus protease (prosome, macropain) 28 subunit, alpha (Psme1), mRNA. /PROD=protease (prosome, macropain) 28 subunit, alpha /FL=gb:NM_017264.1	NM_017264	Rn.2742	Rn.2742	November 2004 (Baylor College of Medicine HGSC Rnor3.4)	chr15:33712917-33715770 (+) // 97.99 // q14 /// chr17:58335597-58336547 (+) // 85.03 // q23.2	proteasome (prosome, macropain) activator subunit 1	Psme1	chr15p13	full length	ENSRNOG00000019041	29630	Q63797 /// Q6P9V7	---	---	NP_058960	NM_017264	---	---	---	---	---	---	0010950 // positive regulation of endopeptidase activity // not recorded /// 0019884 // antigen processing and presentation of exogenous antigen // not recorded /// 0031145 // anaphase-promoting complex-dependent proteasomal ubiquitin-dependent protein catabolic process // not recorded /// 0051436 // negative regulation of ubiquitin-protein ligase activity involved in mitotic cell cycle // not re…	0000502 // proteasome complex // inferred from electronic annotation /// 0008537 // proteasome activator complex // inferred from electronic annotation	0005515 // protein binding // not recorded /// 0061133 // endopeptidase activator activity // not recorded	Proteasome_Degradation // GenMAPP
1367664_at	4.75705	4.48566	4.64148	5.56792	1.95559	1.9607	1.81911	1.81402	P	P	P	P	A	A	A	A	Rat Expression Array 230 2.0	Rattus norvegicus	2011-06-09	Consensus sequence	GenBank	Rn.3789.1	gb:NM_013220.1 /DB_XREF=gi:7106247 /GEN=Alrp /FEA=FLmRNA /CNT=33 /TID=Rn.3789.1 /TIER=FL+Stack /STK=27 /UG=Rn.3789 /LL=27064 /DEF=Rattus norvegicus cardiac ankyrin repeat protein (Alrp), mRNA. /PROD=cardiac ankyrin repeat protein /FL=gb:L81174.1 gb:U50736.1 gb:NM_013220.1	NM_013220	Rn.3789	Rn.3789	November 2004 (Baylor College of Medicine HGSC Rnor3.4)	chr1:240316107-240324797 (-) // 97.91 // q43	ankyrin repeat domain 1 (cardiac muscle)	Ankrd1	chr1q53	full length	ENSRNOG00000018598	27064	Q8R560	---	---	NP_037352	NM_013220	---	---	---	---	---	---	0006357 // regulation of transcription from RNA polymerase II promoter // inferred from electronic annotation /// 0006357 // regulation of transcription from RNA polymerase II promoter // not recorded /// 0016481 // negative regulation of transcription // not recorded /// 0016481 // negative regulation of transcription // traceable author statement	0005634 // nucleus // not recorded /// 0005634 // nucleus // traceable author statement /// 0005634 // nucleus // inferred from electronic annotation /// 0005667 // transcription factor complex // inferred from electronic annotation /// 0005667 // transcription factor complex // not recorded /// 0005737 // cytoplasm // inferred from electronic annotation /// 0005737 // cytoplasm // not recorded /…	0003712 // transcription cofactor activity // traceable author statement /// 0003714 // transcription corepressor activity // inferred from electronic annotation /// 0003714 // transcription corepressor activity // not recorded /// 0005515 // protein binding // inferred from electronic annotation /// 0005515 // protein binding // not recorded	---
1367665_at	3.41655	3.3093	3.14557	3.78848	2.10388	2.13323	2.20857	2.04251	A	A	A	P	A	A	A	A	Rat Expression Array 230 2.0	Rattus norvegicus	2011-06-09	Consensus sequence	GenBank	Rn.3789.1	gb:L81174.1 /DB_XREF=gi:18654143 /GEN=Carp /FEA=FLmRNA /CNT=33 /TID=Rn.3789.1 /TIER=FL /STK=1 /UG=Rn.3789 /LL=27064 /DEF=Rattus norvegicus ankyrin-repeat protein (Carp) mRNA, complete cds. /PROD=ankyrin-repeat protein /FL=gb:L81174.1 gb:U50736.1 gb:NM_013220.1	L81174	Rn.3789	Rn.3789	November 2004 (Baylor College of Medicine HGSC Rnor3.4)	chr1:240316107-240324797 (-) // 97.91 // q43	ankyrin repeat domain 1 (cardiac muscle)	Ankrd1	chr1q53	full length	ENSRNOG00000018598	27064	Q8R560	---	---	NP_037352	NM_013220	---	---	---	---	---	---	0006357 // regulation of transcription from RNA polymerase II promoter // inferred from electronic annotation /// 0006357 // regulation of transcription from RNA polymerase II promoter // not recorded /// 0016481 // negative regulation of transcription // not recorded /// 0016481 // negative regulation of transcription // traceable author statement	0005634 // nucleus // not recorded /// 0005634 // nucleus // traceable author statement /// 0005634 // nucleus // inferred from electronic annotation /// 0005667 // transcription factor complex // inferred from electronic annotation /// 0005667 // transcription factor complex // not recorded /// 0005737 // cytoplasm // inferred from electronic annotation /// 0005737 // cytoplasm // not recorded /…	0003712 // transcription cofactor activity // traceable author statement /// 0003714 // transcription corepressor activity // inferred from electronic annotation /// 0003714 // transcription corepressor activity // not recorded /// 0005515 // protein binding // inferred from electronic annotation /// 0005515 // protein binding // not recorded	---
1367666_at	13.4816	13.4595	13.428	13.4733	13.0474	13.0066	12.9906	13.0092	P	P	P	P	P	P	P	P	Rat Expression Array 230 2.0	Rattus norvegicus	2011-06-09	Consensus sequence	GenBank	Rn.23677.1	gb:NM_080896.1 /DB_XREF=gi:18266699 /GEN=Hnrnph1 /FEA=FLmRNA /CNT=42 /TID=Rn.23677.1 /TIER=FL+Stack /STK=26 /UG=Rn.23677 /DEF=Rattus norvegicus heterogeneous nuclear ribonucleoprotein H1 (Hnrnph1), mRNA. /PROD=heterogeneous nuclear ribonucleoprotein H1 /FL=gb:NM_080896.1 gb:AF367468.1	NM_080896	Rn.23677	Rn.23677	November 2004 (Baylor College of Medicine HGSC Rnor3.4)	chr10:35921418-35930132 (+) // 98.8 // p11.21	heterogeneous nuclear ribonucleoprotein H1	Hnrph1	chr10q22	full length	ENSRNOG00000003399	140931	D3ZYW2 /// Q499R8 /// Q8VHV7	---	---	NP_543172	NM_080896	---	---	---	---	---	---	0006396 // RNA processing // traceable author statement /// 0006397 // mRNA processing // inferred from electronic annotation /// 0008380 // RNA splicing // inferred from electronic annotation /// 0043484 // regulation of RNA splicing // inferred from sequence or structural similarity	0005634 // nucleus // inferred from direct assay /// 0005634 // nucleus // inferred from electronic annotation /// 0005654 // nucleoplasm // inferred from direct assay /// 0005654 // nucleoplasm // inferred from electronic annotation /// 0005681 // spliceosomal complex // inferred from electronic annotation /// 0030529 // ribonucleoprotein complex // inferred from electronic annotation	0000166 // nucleotide binding // inferred from electronic annotation /// 0003676 // nucleic acid binding // inferred from electronic annotation /// 0003723 // RNA binding // inferred from sequence or structural similarity /// 0003723 // RNA binding // inferred from electronic annotation	---
1367667_at	12.6768	12.8835	13.0958	12.8381	12.4289	12.3959	12.2838	12.376	P	P	P	P	P	P	P	P	Rat Expression Array 230 2.0	Rattus norvegicus	2011-06-09	Consensus sequence	GenBank	Rn.2622.1	gb:NM_031840.1 /DB_XREF=gi:13929205 /GEN=Fdps /FEA=FLmRNA /CNT=41 /TID=Rn.2622.1 /TIER=FL+Stack /STK=26 /UG=Rn.2622 /LL=83791 /DEF=Rattus norvegicus Farnesyl diphosphate synthase (Fdps), mRNA. /PROD=testis-specific farnesyl pyrophosphatesynthetase /FL=gb:M17300.1 gb:M34477.1 gb:NM_031840.1	NM_031840	Rn.2622	Rn.2848	November 2004 (Baylor College of Medicine HGSC Rnor3.4)	chr2:181168901-181177903 (-) // 78.93 // q31.3	farnesyl diphosphate synthase (farnesyl pyrophosphate synthetase, dimethylallyltranstransferase, geranyltranstransferase)	Fdps	chr2q34	full length	---	83791	P05369 /// Q7TPK0	EC:2.5.1.1 /// EC:2.5.1.10	---	NP_114028	NM_031840	---	---	---	---	---	---	0006694 // steroid biosynthetic process // inferred from electronic annotation /// 0006695 // cholesterol biosynthetic process // traceable author statement /// 0006695 // cholesterol biosynthetic process // inferred from electronic annotation /// 0007283 // spermatogenesis // inferred from expression pattern /// 0008299 // isoprenoid biosynthetic process // inferred from direct assay /// 0008299…	0005625 // soluble fraction // inferred from direct assay /// 0005737 // cytoplasm // inferred from electronic annotation /// 0005739 // mitochondrion // not recorded /// 0005759 // mitochondrial matrix // inferred from direct assay /// 0005777 // peroxisome // inferred from direct assay	0004161 // dimethylallyltranstransferase activity // inferred from electronic annotation /// 0004311 // farnesyltranstransferase activity // inferred from genetic interaction /// 0004337 // geranyltranstransferase activity // inferred from direct assay /// 0004337 // geranyltranstransferase activity // traceable author statement /// 0004337 // geranyltranstransferase activity // inferred from ele…	Cholesterol_Biosynthesis // GenMAPP /// Cholesterol_biosynthesis_KEGG // GenMAPP
1367668_a_at	12.665	13.1136	13.1587	12.374	13.1729	13.1807	13.1295	13.3178	P	P	P	P	P	P	P	P	Rat Expression Array 230 2.0	Rattus norvegicus	2011-06-09	Consensus sequence	GenBank	Rn.2627.1	gb:NM_031841.1 /DB_XREF=gi:13929207 /GEN=Scd2 /FEA=FLmRNA /CNT=71 /TID=Rn.2627.1 /TIER=FL+Stack /STK=26 /UG=Rn.2627 /LL=83792 /DEF=Rattus norvegicus stearoyl-Coenzyme A desaturase 2 (Scd2), mRNA. /PROD=stearoyl-Coenzyme A desaturase 2 /FL=gb:AB032243.1 gb:NM_031841.1	NM_031841	Rn.2627	Rn.83595	November 2004 (Baylor College of Medicine HGSC Rnor3.4)	chr1:249358104-249371165 (+) // 91.24 //	stearoyl-CoA desaturase (delta-9-desaturase)	Scd	chr1q54	full length	---	83792	O54953 /// P97600 /// Q6P7B9	EC:1.14.19.1	---	NP_114029	NM_031841	---	---	---	---	---	---	0006629 // lipid metabolic process // inferred from electronic annotation /// 0006633 // fatty acid biosynthetic process // traceable author statement /// 0006633 // fatty acid biosynthetic process // inferred from electronic annotation /// 0008610 // lipid biosynthetic process // inferred from electronic annotation /// 0042552 // myelination // inferred from expression pattern /// 0055114 // oxi…	0005783 // endoplasmic reticulum // inferred from electronic annotation /// 0005783 // endoplasmic reticulum // not recorded /// 0005789 // endoplasmic reticulum membrane // inferred from electronic annotation /// 0005792 // microsome // traceable author statement /// 0016020 // membrane // inferred from electronic annotation /// 0016021 // integral to membrane // inferred from electronic annotat…	0004768 // stearoyl-CoA 9-desaturase activity // inferred from direct assay /// 0004768 // stearoyl-CoA 9-desaturase activity // traceable author statement /// 0004768 // stearoyl-CoA 9-desaturase activity // inferred from electronic annotation /// 0005506 // iron ion binding // inferred from electronic annotation /// 0016491 // oxidoreductase activity // inferred from electronic annotation /// 0…	Fatty_Acid_Synthesis // GenMAPP
1367669_a_at	10.1205	10.0269	10.2703	10.1872	10.3049	10.2549	10.2892	10.3804	P	P	P	P	P	P	P	P	Rat Expression Array 230 2.0	Rattus norvegicus	2011-06-09	Consensus sequence	GenBank	Rn.883.2	gb:AI233190 /DB_XREF=gi:3817070 /DB_XREF=EST229878 /CLONE=RKIDC01 /FEA=EST /CNT=23 /TID=Rn.883.2 /TIER=Stack /STK=19 /UG=Rn.883 /LL=64862 /UG_GENE=MPL3 /UG_TITLE=microtubule-associated proteins 1A1B light chain 3	AI233190	Rn.883	Rn.41412	November 2004 (Baylor College of Medicine HGSC Rnor3.4)	chr19:51850571-51854008 (+) // 98.6 // q13.41 /// chr16:75796574-75797167 (-) // 74.87 // q23.1	microtubule-associated protein 1 light chain 3 beta	Map1lc3b	chr19q12	full length	ENSRNOG00000017905 /// ENSRNOG00000038106	64862	Q62625 /// Q7TQ75	---	---	NP_074058	NM_022867	---	---	---	---	---	---	0006914 // autophagy // inferred from electronic annotation /// 0032092 // positive regulation of protein binding // inferred from direct assay	0000421 // autophagic vacuole membrane // inferred from direct assay /// 0000421 // autophagic vacuole membrane // inferred from electronic annotation /// 0005622 // intracellular // not recorded /// 0005625 // soluble fraction // inferred from direct assay /// 0005626 // insoluble fraction // inferred from direct assay /// 0005737 // cytoplasm // inferred from direct assay /// 0005737 // cytopla…	0005515 // protein binding // not recorded /// 0008017 // microtubule binding // inferred from direct assay /// 0015631 // tubulin binding // inferred from direct assay /// 0019904 // protein domain specific binding // inferred from physical interaction	---
1367670_at	11.0033	10.9928	10.9535	11.0184	11.6385	11.6986	11.6674	11.6535	P	P	P	P	P	P	P	P	Rat Expression Array 230 2.0	Rattus norvegicus	2011-06-09	Consensus sequence	GenBank	Rn.29782.1	gb:NM_017005.1 /DB_XREF=gi:8393357 /GEN=Fh /FEA=FLmRNA /CNT=32 /TID=Rn.29782.1 /TIER=FL+Stack /STK=26 /UG=Rn.29782 /LL=24368 /DEF=Rattus norvegicus Fumarate hydratase (Fh), mRNA. /PROD=fumarate hydratase /FL=gb:J04473.1 gb:NM_017005.1	NM_017005	Rn.29782	Rn.29782	November 2004 (Baylor College of Medicine HGSC Rnor3.4)	chr13:91329841-91355733 (-) // 97.12 // q31.3	fumarate hydratase 1	Fh1	chr13q25	full length	ENSRNOG00000003653	24368	P14408 /// Q5M964	EC:4.2.1.2	---	NP_058701	NM_017005	---	---	---	---	---	---	0006099 // tricarboxylic acid cycle // inferred from direct assay /// 0006099 // tricarboxylic acid cycle // inferred from electronic annotation /// 0006106 // fumarate metabolic process // inferred from direct assay /// 0006106 // fumarate metabolic process // traceable author statement /// 0006106 // fumarate metabolic process // inferred from electronic annotation /// 0006108 // malate metabol…	0005737 // cytoplasm // inferred from electronic annotation /// 0005739 // mitochondrion // inferred from direct assay /// 0005739 // mitochondrion // not recorded /// 0005739 // mitochondrion // inferred from electronic annotation /// 0005759 // mitochondrial matrix // not recorded /// 0045239 // tricarboxylic acid cycle enzyme complex // inferred from electronic annotation	0003824 // catalytic activity // inferred from electronic annotation /// 0004333 // fumarate hydratase activity // inferred from direct assay /// 0004333 // fumarate hydratase activity // inferred from mutant phenotype /// 0004333 // fumarate hydratase activity // not recorded /// 0004333 // fumarate hydratase activity // inferred from electronic annotation /// 0016829 // lyase activity // inferr…	Krebs-TCA_Cycle // GenMAPP
1367671_at	12.7878	12.7618	12.786	12.8461	12.9936	13.0309	12.9756	13.0369	P	P	P	P	P	P	P	P	Rat Expression Array 230 2.0	Rattus norvegicus	2011-06-09	Consensus sequence	GenBank	Rn.223.1	gb:NM_022381.1 /DB_XREF=gi:11693141 /GEN=Pcna /FEA=FLmRNA /CNT=45 /TID=Rn.223.1 /TIER=FL+Stack /STK=25 /UG=Rn.223 /LL=25737 /DEF=Rattus norvegicus Proliferating cell nuclear antigen (Pcna), mRNA. /PROD=proliferating cell nuclear antigen /FL=gb:NM_022381.1	NM_022381	Rn.223	Rn.223	November 2004 (Baylor College of Medicine HGSC Rnor3.4)	chr3:120008705-120012695 (-) // 99.45 // q13.33	proliferating cell nuclear antigen	Pcna	chr3q36	full length	ENSRNOG00000021264	25737	P04961	---	---	NP_071776	NM_022381	---	---	---	---	---	---	0006260 // DNA replication // inferred from electronic annotation /// 0006275 // regulation of DNA replication // inferred from electronic annotation /// 0006287 // base-excision repair, gap-filling // inferred from electronic annotation /// 0006287 // base-excision repair, gap-filling // not recorded /// 0006297 // nucleotide-excision repair, DNA gap filling // not recorded /// 0006298 // mismat…	0000307 // cyclin-dependent protein kinase holoenzyme complex // inferred from electronic annotation /// 0000307 // cyclin-dependent protein kinase holoenzyme complex // not recorded /// 0005634 // nucleus // inferred from direct assay /// 0005634 // nucleus // not recorded /// 0005634 // nucleus // inferred from electronic annotation /// 0005652 // nuclear lamina // inferred from electronic anno…	0000701 // purine-specific mismatch base pair DNA N-glycosylase activity // inferred from electronic annotation /// 0000701 // purine-specific mismatch base pair DNA N-glycosylase activity // not recorded /// 0003677 // DNA binding // inferred from electronic annotation /// 0005515 // protein binding // inferred from physical interaction /// 0005515 // protein binding // not recorded /// 0005515 …	Cell_cycle_KEGG // GenMAPP /// DNA_replication_Reactome // GenMAPP /// G1_to_S_cell_cycle_Reactome // GenMAPP
1367672_at	10.4859	10.4966	10.6394	10.5744	10.2318	10.2819	10.2646	10.3159	P	P	P	P	P	P	P	P	Rat Expression Array 230 2.0	Rattus norvegicus	2011-06-09	Consensus sequence	GenBank	Rn.2082.1	gb:NM_024392.1 /DB_XREF=gi:13242302 /GEN=Hsd17b4 /FEA=FLmRNA /CNT=39 /TID=Rn.2082.1 /TIER=FL+Stack /STK=25 /UG=Rn.2082 /LL=79244 /DEF=Rattus norvegicus peroxisomal multifunctional enzyme type II (Hsd17b4), mRNA. /PROD=peroxisomal multifunctional enzyme type II /FL=gb:U37486.1 gb:NM_024392.1	NM_024392	Rn.2082	Rn.2082	November 2004 (Baylor College of Medicine HGSC Rnor3.4)	chr18:45157434-45251606 (+) // 98.84 // q21.1	hydroxysteroid (17-beta) dehydrogenase 4	Hsd17b4	chr18q11	full length	ENSRNOG00000015840	79244	P70523 /// P70540 /// P97852 /// Q6IN39	EC:4.2.1.107 /// EC:4.2.1.119	---	NP_077368	NM_024392	---	---	---	---	---	---	0000038 // very long-chain fatty acid metabolic process // inferred from electronic annotation /// 0000038 // very long-chain fatty acid metabolic process // not recorded /// 0006629 // lipid metabolic process // inferred from electronic annotation /// 0006631 // fatty acid metabolic process // inferred from electronic annotation /// 0006635 // fatty acid beta-oxidation // inferred from electroni…	0005739 // mitochondrion // inferred from electronic annotation /// 0005739 // mitochondrion // not recorded /// 0005777 // peroxisome // inferred from direct assay /// 0005777 // peroxisome // not recorded /// 0005777 // peroxisome // inferred from electronic annotation /// 0005782 // peroxisomal matrix // not recorded	0003824 // catalytic activity // inferred from electronic annotation /// 0003857 // 3-hydroxyacyl-CoA dehydrogenase activity // not recorded /// 0003857 // 3-hydroxyacyl-CoA dehydrogenase activity // inferred from electronic annotation /// 0005488 // binding // inferred from electronic annotation /// 0005515 // protein binding // not recorded /// 0016491 // oxidoreductase activity // inferred fro…	Steroid_Biosynthesis // GenMAPP
1367673_at	10.7219	10.6852	10.9272	10.8053	11.4305	11.4743	11.3901	11.6788	P	P	P	P	P	P	P	P	Rat Expression Array 230 2.0	Rattus norvegicus	2011-06-09	Consensus sequence	GenBank	Rn.16617.1	gb:NM_080892.1 /DB_XREF=gi:18266691 /GEN=Selenbp2 /FEA=FLmRNA /CNT=30 /TID=Rn.16617.1 /TIER=FL+Stack /STK=25 /UG=Rn.16617 /DEF=Rattus norvegicus selenium binding protein 2 (Selenbp2), mRNA. /PROD=selenium binding protein 2 /FL=gb:NM_080892.1 gb:AB036799.1	NM_080892	Rn.16617	Rn.16617	November 2004 (Baylor College of Medicine HGSC Rnor3.4)	chr2:189840449-189847639 (-) // 94.84 // q32.2	selenium binding protein 1	Selenbp1	chr2q34	full length	ENSRNOG00000020992	140927	Q8VIF7	---	---	NP_543168	NM_080892	---	---	---	---	---	---	0006810 // transport // inferred from electronic annotation /// 0015031 // protein transport // inferred from electronic annotation /// 0050873 // brown fat cell differentiation // not recorded	0005634 // nucleus // inferred from electronic annotation /// 0005737 // cytoplasm // inferred from electronic annotation /// 0005829 // cytosol // inferred from electronic annotation /// 0016020 // membrane // inferred from electronic annotation	0005515 // protein binding // not recorded /// 0008430 // selenium binding // inferred from electronic annotation	---
1367674_at	9.82309	9.72288	9.8223	9.89899	10.7421	10.6153	10.7803	10.7877	P	P	P	P	P	P	P	P	Rat Expression Array 230 2.0	Rattus norvegicus	2011-06-09	Consensus sequence	GenBank	Rn.2399.1	gb:NM_053742.1 /DB_XREF=gi:16758567 /GEN=Pitpnb /FEA=FLmRNA /CNT=38 /TID=Rn.2399.1 /TIER=FL+Stack /STK=25 /UG=Rn.2399 /LL=114561 /DEF=Rattus norvegicus phosphotidylinositol transfer protein, beta (Pitpnb), mRNA. /PROD=phosphotidylinositol transfer protein, beta /FL=gb:D21132.1 gb:NM_053742.1	NM_053742	Rn.2399	Rn.2399	November 2004 (Baylor College of Medicine HGSC Rnor3.4)	chr12:45386038-45434744 (-) // 97.28 // q12	phosphatidylinositol transfer protein, beta	Pitpnb	chr12q16	full length	ENSRNOG00000000665	114561	D3ZBD4 /// D3ZCD4 /// P53812	---	---	NP_446194	NM_053742	---	---	---	---	---	---	0001701 // in utero embryonic development // not recorded /// 0006810 // transport // inferred from electronic annotation	0005622 // intracellular // inferred from electronic annotation /// 0005634 // nucleus // not recorded /// 0005737 // cytoplasm // inferred from electronic annotation /// 0005737 // cytoplasm // not recorded /// 0005794 // Golgi apparatus // inferred from electronic annotation /// 0043231 // intracellular membrane-bounded organelle // not recorded	0008289 // lipid binding // inferred from electronic annotation /// 0008526 // phosphatidylinositol transporter activity // inferred from mutant phenotype	---
1367675_at	11.532	11.6115	11.5885	11.4922	9.49131	9.64863	9.79581	9.83143	P	P	P	P	P	P	P	P	Rat Expression Array 230 2.0	Rattus norvegicus	2011-06-09	Consensus sequence	GenBank	Rn.833.1	gb:NM_031145.1 /DB_XREF=gi:13592134 /GEN=Sip2-28 /FEA=FLmRNA /CNT=31 /TID=Rn.833.1 /TIER=FL+Stack /STK=25 /UG=Rn.833 /LL=81823 /DEF=Rattus norvegicus calcium- and integrin-binding protein (Sip2-28), mRNA. /PROD=calcium- and integrin-binding protein /FL=gb:NM_031145.1 gb:AF136585.1	NM_031145	Rn.833	Rn.833	November 2004 (Baylor College of Medicine HGSC Rnor3.4)	chr1:136031856-136045153 (-) // 97.38 // q12	calcium and integrin binding 1 (calmyrin)	Cib1	chr1q31	full length	ENSRNOG00000033498	81823	D3ZZJ2 /// Q9R010	---	---	NP_112407	NM_031145	---	---	---	---	---	---	0006915 // apoptosis // not recorded /// 0006915 // apoptosis // inferred from sequence or structural similarity /// 0006915 // apoptosis // inferred from electronic annotation /// 0006974 // response to DNA damage stimulus // not recorded /// 0006974 // response to DNA damage stimulus // inferred from sequence or structural similarity /// 0006974 // response to DNA damage stimulus // inferred fr…	0005634 // nucleus // inferred from electronic annotation /// 0005654 // nucleoplasm // not recorded /// 0005654 // nucleoplasm // inferred from sequence or structural similarity /// 0005654 // nucleoplasm // inferred from electronic annotation /// 0005737 // cytoplasm // not recorded /// 0005737 // cytoplasm // inferred from sequence or structural similarity /// 0005737 // cytoplasm // inferred …	0005509 // calcium ion binding // inferred from electronic annotation /// 0005509 // calcium ion binding // not recorded /// 0005509 // calcium ion binding // inferred from sequence or structural similarity /// 0005515 // protein binding // inferred from direct assay /// 0005515 // protein binding // not recorded /// 0005515 // protein binding // inferred from electronic annotation	---
1367676_at	13.7637	13.6741	13.6423	13.6803	13.7485	13.7037	13.5963	13.8001	P	P	P	P	P	P	P	P	Rat Expression Array 230 2.0	Rattus norvegicus	2011-06-09	Consensus sequence	GenBank	Rn.2874.1	gb:NM_017187.1 /DB_XREF=gi:8393535 /GEN=Hmgb2 /FEA=FLmRNA /CNT=44 /TID=Rn.2874.1 /TIER=FL+Stack /STK=25 /UG=Rn.2874 /LL=29395 /DEF=Rattus norvegicus high mobility group box 2 (Hmgb2), mRNA. /PROD=high mobility group box 2 /FL=gb:D84418.1 gb:NM_017187.1	NM_017187	Rn.2874	Rn.2874	November 2004 (Baylor College of Medicine HGSC Rnor3.4)	chr11:48276319-48277407 (+) // 85.33 // p11.2 /// chr14:74252391-74253467 (+) // 83.66 // q24.3 /// chr16:23869584-23870684 (+) // 81.37 // p12.2 /// chr4:123779637-123780793 (+) // 85.06 // q27 /// chr1:19873266-19874354 (-) // 83.74 // p36.13 /// chr13:37867394-37868098 (-) // 50.53 // q13.3 /// chr16:36131307-36133843 (-) // 86.56 // p11.1 /// chr2:190674426-190675589 (-) // 80.49 // q32.2	high mobility group box 2	Hmgb2	chr16p11	full length	ENSRNOG00000013167	29395	P52925	---	---	NP_058883	NM_017187	---	---	---	---	---	---	0001938 // positive regulation of endothelial cell proliferation // not recorded /// 0006288 // base-excision repair, DNA ligation // not recorded /// 0006288 // base-excision repair, DNA ligation // inferred from sequence or structural similarity /// 0006357 // regulation of transcription from RNA polymerase II promoter // not recorded /// 0006357 // regulation of transcription from RNA polymera…	0000793 // condensed chromosome // not recorded /// 0000793 // condensed chromosome // inferred from sequence or structural similarity /// 0005615 // extracellular space // not recorded /// 0005625 // soluble fraction // inferred from direct assay /// 0005634 // nucleus // inferred from direct assay /// 0005634 // nucleus // not recorded /// 0005634 // nucleus // inferred from sequence or structu…	0003677 // DNA binding // not recorded /// 0003677 // DNA binding // inferred from electronic annotation /// 0003684 // damaged DNA binding // not recorded /// 0003690 // double-stranded DNA binding // traceable author statement /// 0003700 // sequence-specific DNA binding transcription factor activity // not recorded /// 0005488 // binding // inferred from electronic annotation /// 0005515 // pr…	---
1367677_at	10.232	10.2756	10.374	10.3028	11.5316	11.6795	11.6008	11.6266	P	P	P	P	P	P	P	P	Rat Expression Array 230 2.0	Rattus norvegicus	2011-06-09	Consensus sequence	GenBank	Rn.2944.1	gb:NM_053610.1 /DB_XREF=gi:16758403 /GEN=Prdx6 /FEA=FLmRNA /CNT=30 /TID=Rn.2944.1 /TIER=FL+Stack /STK=25 /UG=Rn.2944 /LL=113898 /DEF=Rattus norvegicus peroxiredoxin 6 (Prdx6), mRNA. /PROD=peroxiredoxin 6 /FL=gb:AF110732.1 gb:NM_053610.1	NM_053610	Rn.2944	Rn.2944	November 2004 (Baylor College of Medicine HGSC Rnor3.4)	chr1:209583413-209586401 (-) // 97.5 // q32.2	peroxiredoxin 5	Prdx5	chr1q43	full length	ENSRNOG00000021125	113898	D3ZEN5 /// Q9R063	EC:1.11.1.15	---	NP_446062	NM_053610	---	---	---	---	---	---	0006979 // response to oxidative stress // inferred from electronic annotation /// 0006979 // response to oxidative stress // not recorded /// 0034614 // cellular response to reactive oxygen species // inferred from electronic annotation /// 0034614 // cellular response to reactive oxygen species // not recorded /// 0043066 // negative regulation of apoptosis // inferred from electronic annotatio…	0005737 // cytoplasm // inferred from electronic annotation /// 0005739 // mitochondrion // inferred from direct assay /// 0005739 // mitochondrion // not recorded /// 0005739 // mitochondrion // inferred from electronic annotation /// 0005777 // peroxisome // inferred from direct assay /// 0005777 // peroxisome // not recorded /// 0005777 // peroxisome // inferred from electronic annotation /// …	0004601 // peroxidase activity // inferred from electronic annotation /// 0004601 // peroxidase activity // not recorded /// 0016209 // antioxidant activity // inferred from electronic annotation /// 0016491 // oxidoreductase activity // inferred from electronic annotation /// 0043027 // caspase inhibitor activity // inferred from electronic annotation /// 0043027 // caspase inhibitor activity //…	---
1367678_at	11.5966	11.6168	11.6432	11.597	13.2968	13.3998	13.3304	13.3787	P	P	P	P	P	P	P	P	Rat Expression Array 230 2.0	Rattus norvegicus	2011-06-09	Consensus sequence	GenBank	Rn.3593.1	gb:NM_130428.1 /DB_XREF=gi:18426857 /GEN=Sdha /FEA=FLmRNA /CNT=39 /TID=Rn.3593.1 /TIER=FL+Stack /STK=24 /UG=Rn.3593 /DEF=Rattus norvegicus succinate dehydrogenase complex, subunit A, flavoprotein (Fp) (Sdha), mRNA. /PROD=succinate dehydrogenase complex, subunit A,flavoprotein (Fp) /FL=gb:NM_130428.1 gb:AB072907.1	NM_130428	Rn.3593	Rn.101725	November 2004 (Baylor College of Medicine HGSC Rnor3.4)	chr1:29739357-29764928 (+) // 88.44 // p35.3	succinate dehydrogenase complex, subunit A, flavoprotein (Fp)	Sdha	chr1p11	full length	ENSRNOG00000013331	157074	Q0QF18 /// Q920L2	EC:1.3.5.1	---	NP_569112	NM_130428	---	---	---	---	---	---	0006099 // tricarboxylic acid cycle // inferred from electronic annotation /// 0006105 // succinate metabolic process // inferred from mutant phenotype /// 0006105 // succinate metabolic process // not recorded /// 0006105 // succinate metabolic process // inferred from sequence or structural similarity /// 0006105 // succinate metabolic process // inferred from electronic annotation /// 0006810 …	0005739 // mitochondrion // inferred from electronic annotation /// 0005739 // mitochondrion // not recorded /// 0005743 // mitochondrial inner membrane // inferred from direct assay /// 0005743 // mitochondrial inner membrane // not recorded /// 0005743 // mitochondrial inner membrane // inferred from sequence or structural similarity /// 0005743 // mitochondrial inner membrane // inferred from …	0000104 // succinate dehydrogenase activity // not recorded /// 0000104 // succinate dehydrogenase activity // inferred from sequence or structural similarity /// 0000104 // succinate dehydrogenase activity // inferred from electronic annotation /// 0005515 // protein binding // not recorded /// 0005515 // protein binding // inferred from electronic annotation /// 0008177 // succinate dehydrogena…	Electron_Transport_Chain // GenMAPP /// Krebs-TCA_Cycle // GenMAPP
1367679_at	2.35954	2.20881	2.33433	2.34248	2.27915	2.166	2.19726	2.18526	A	A	A	A	A	A	A	A	Rat Expression Array 230 2.0	Rattus norvegicus	2011-06-09	Consensus sequence	GenBank	Rn.33804.1	gb:NM_013069.1 /DB_XREF=gi:6978636 /GEN=Cd74 /FEA=FLmRNA /CNT=30 /TID=Rn.33804.1 /TIER=FL+Stack /STK=24 /UG=Rn.33804 /LL=25599 /DEF=Rattus norvegicus CD74 antigen (invariant polpypeptide of major histocompatibility class II antigen-associated) (Cd74), mRNA. /PROD=CD74 antigen (invariant polpypeptide of majorhistocompatibility class II antigen-associated) /FL=gb:NM_013069.1	NM_013069	Rn.33804	Rn.33804	November 2004 (Baylor College of Medicine HGSC Rnor3.4)	chr18:56756554-56765711 (+) // 96.84 // q21.32	Cd74 molecule, major histocompatibility complex, class II invariant chain	Cd74	chr18q12.1	full length	ENSRNOG00000018735	25599	B5DFE3 /// P10247 /// Q6GT70	---	---	NP_037201	NM_013069	---	---	---	---	---	---	0000187 // activation of MAPK activity // inferred from direct assay /// 0001516 // prostaglandin biosynthetic process // not recorded /// 0001516 // prostaglandin biosynthetic process // inferred from sequence or structural similarity /// 0001516 // prostaglandin biosynthetic process // inferred from electronic annotation /// 0001961 // positive regulation of cytokine-mediated signaling pathway …	0005764 // lysosome // inferred from electronic annotation /// 0005764 // lysosome // not recorded /// 0005770 // late endosome // not recorded /// 0005770 // late endosome // inferred from electronic annotation /// 0005771 // multivesicular body // inferred from electronic annotation /// 0005771 // multivesicular body // not recorded /// 0005773 // vacuole // inferred from electronic annotation …	0001540 // beta-amyloid binding // inferred from electronic annotation /// 0001540 // beta-amyloid binding // not recorded /// 0004896 // cytokine receptor activity // inferred from electronic annotation /// 0004896 // cytokine receptor activity // not recorded /// 0005215 // transporter activity // inferred from electronic annotation /// 0005515 // protein binding // inferred from direct assay /…	---
1367680_at	9.68313	9.91168	10.0355	10.0228	9.85086	9.76005	9.95991	9.9783	P	P	P	P	P	P	P	P	Rat Expression Array 230 2.0	Rattus norvegicus	2011-06-09	Consensus sequence	GenBank	Rn.31796.1	gb:NM_017340.1 /DB_XREF=gi:8394148 /GEN=RATACOA1 /FEA=FLmRNA /CNT=32 /TID=Rn.31796.1 /TIER=FL+Stack /STK=24 /UG=Rn.31796 /LL=50681 /DEF=Rattus norvegicus acyl-coA oxidase (RATACOA1), mRNA. /PROD=acyl-coA oxidase /FL=gb:NM_017340.1 gb:J02752.1	NM_017340	Rn.31796	Rn.31796	November 2004 (Baylor College of Medicine HGSC Rnor3.4)	chr10:106280432-106296103 (-) // 88.25 // q25.1	acyl-Coenzyme A oxidase 1, palmitoyl	Acox1	chr10q32.3	full length	ENSRNOG00000008755	50681	P07872	EC:1.3.3.6	---	NP_059036	NM_017340	---	---	---	---	---	---	0000038 // very long-chain fatty acid metabolic process // not recorded /// 0006091 // generation of precursor metabolites and energy // not recorded /// 0006091 // generation of precursor metabolites and energy // inferred from sequence or structural similarity /// 0006629 // lipid metabolic process // not recorded /// 0006629 // lipid metabolic process // inferred from sequence or structural si…	0005737 // cytoplasm // not recorded /// 0005739 // mitochondrion // not recorded /// 0005777 // peroxisome // inferred from direct assay /// 0005777 // peroxisome // not recorded /// 0005777 // peroxisome // inferred from sequence or structural similarity /// 0005777 // peroxisome // inferred from electronic annotation /// 0005778 // peroxisomal membrane // not recorded	0003995 // acyl-CoA dehydrogenase activity // inferred from electronic annotation /// 0003997 // acyl-CoA oxidase activity // not recorded /// 0003997 // acyl-CoA oxidase activity // inferred from sequence or structural similarity /// 0003997 // acyl-CoA oxidase activity // inferred from electronic annotation /// 0005504 // fatty acid binding // inferred from direct assay /// 0016401 // palmitoyl…	---
1367681_at	13.1432	13.2277	13.369	13.3664	11.5597	11.7258	11.6008	11.4464	P	P	P	P	P	P	P	P	Rat Expression Array 230 2.0	Rattus norvegicus	2011-06-09	Consensus sequence	GenBank	Rn.1465.1	gb:NM_022523.1 /DB_XREF=gi:11968105 /GEN=Cd151 /FEA=FLmRNA /CNT=29 /TID=Rn.1465.1 /TIER=FL+Stack /STK=24 /UG=Rn.1465 /LL=64315 /DEF=Rattus norvegicus CD151 antigen (Cd151), mRNA. /PROD=CD151 antigen /FL=gb:AF192547.2 gb:NM_022523.1	NM_022523	Rn.1465	Rn.1465	November 2004 (Baylor College of Medicine HGSC Rnor3.4)	chr1:201653959-201657969 (+) // 88.99 // q32.1	CD151 molecule (Raph blood group)	Cd151	chr1q41	full length	ENSRNOG00000019215	64315	Q9QZA6	---	---	NP_071968	NM_022523	---	---	---	---	---	---	0031581 // hemidesmosome assembly // not recorded	0005829 // cytosol // not recorded /// 0016020 // membrane // inferred from electronic annotation /// 0016021 // integral to membrane // inferred from electronic annotation	0005515 // protein binding // inferred from electronic annotation /// 0005515 // protein binding // not recorded	---
1367682_at	2.60093	2.87746	3.00716	2.8401	3.32273	3.5424	3.66358	3.37024	A	A	A	A	A	A	A	A	Rat Expression Array 230 2.0	Rattus norvegicus	2011-06-09	Consensus sequence	GenBank	Rn.17447.1	gb:NM_030859.1 /DB_XREF=gi:13540680 /GEN=Mdk /FEA=FLmRNA /CNT=29 /TID=Rn.17447.1 /TIER=FL+Stack /STK=24 /UG=Rn.17447 /LL=81517 /DEF=Rattus norvegicus midkine (Mdk), mRNA. /PROD=midkine /FL=gb:AB025023.1 gb:NM_030859.1 gb:AF315950.1	NM_030859	Rn.17447	Rn.17447	November 2004 (Baylor College of Medicine HGSC Rnor3.4)	chr3:76309713-76311672 (-) // 97.12 // p12.3	midkine	Mdk	chr3q24	full length	ENSRNOG00000017560	81517	A9UMV0 /// D3ZPZ4 /// D4A023 /// Q9R1S9	---	---	NP_110486	NM_030859	---	---	---	---	---	---	0000087 // M phase of mitotic cell cycle // inferred from expression pattern /// 0007275 // multicellular organismal development // inferred from electronic annotation /// 0009611 // response to wounding // inferred from direct assay /// 0009611 // response to wounding // not recorded /// 0009725 // response to hormone stimulus // inferred from expression pattern /// 0016477 // cell migration // …	0005576 // extracellular region // inferred from electronic annotation	0008083 // growth factor activity // inferred from electronic annotation /// 0008201 // heparin binding // not recorded /// 0008201 // heparin binding // inferred from sequence or structural similarity /// 0008201 // heparin binding // inferred from electronic annotation	---
1367683_at	12.8131	12.874	12.8075	12.7619	13.0664	13.1136	13.0531	13.0578	P	P	P	P	P	P	P	P	Rat Expression Array 230 2.0	Rattus norvegicus	2011-06-09	Consensus sequence	GenBank	Rn.2949.1	gb:NM_053483.1 /DB_XREF=gi:16758241 /GEN=Kpna2 /FEA=FLmRNA /CNT=27 /TID=Rn.2949.1 /TIER=FL+Stack /STK=24 /UG=Rn.2949 /LL=85245 /DEF=Rattus norvegicus karyopherin (importin) alpha 2 (Kpna2), mRNA. /PROD=karyopherin (importin) alpha 2 /FL=gb:NM_053483.1	NM_053483	Rn.2949	Rn.2949	November 2004 (Baylor College of Medicine HGSC Rnor3.4)	chr2:129906344-129908191 (+) // 92.68 // q21.1 /// chr6:10523381-10525253 (+) // 98.99 // p24.3 /// chr6:10584740-10586832 (+) // 55.51 // p24.3 /// chr10:96126732-96352613 (-) // 99.2 // q23.33 /// chr14:1092993-1094826 (-) // 93.27 // p13 /// chr18:33905332-33907189 (-) // 92.9 // q12.2 /// chrX:134255285-134257130 (-) // 93.69 // q26.3	karyopherin alpha 2	Kpna2	chr10q32.1	full length	ENSRNOG00000015329	85245	Q6P6T9 /// Q9Z0N9	---	---	NP_445935	NM_053483	---	---	---	---	---	---	0006606 // protein import into nucleus // not recorded /// 0006606 // protein import into nucleus // traceable author statement /// 0006606 // protein import into nucleus // inferred from electronic annotation /// 0006886 // intracellular protein transport // traceable author statement /// 0006886 // intracellular protein transport // inferred from electronic annotation /// 0046015 // regulation …	0005634 // nucleus // inferred from electronic annotation /// 0005643 // nuclear pore // inferred from electronic annotation /// 0005737 // cytoplasm // inferred from electronic annotation	0005488 // binding // inferred from electronic annotation /// 0005515 // protein binding // not recorded /// 0008565 // protein transporter activity // not recorded /// 0008565 // protein transporter activity // inferred from electronic annotation /// 0042826 // histone deacetylase binding // not recorded	---
1367684_at	2.36222	2.35741	2.30244	2.52955	2.46962	2.69643	2.31279	2.46509	A	A	A	A	A	A	A	A	Rat Expression Array 230 2.0	Rattus norvegicus	2011-06-09	Consensus sequence	GenBank	Rn.10350.1	gb:NM_012937.1 /DB_XREF=gi:6978712 /GEN=Crybb2 /FEA=FLmRNA /CNT=25 /TID=Rn.10350.1 /TIER=FL+Stack /STK=24 /UG=Rn.10350 /LL=25422 /DEF=Rattus norvegicus R.norvegicus CRYBB2 gene (crystallin, beta B2) (Crybb2), mRNA. /PROD=R.norvegicus CRYBB2 gene (crystallin, beta B2) /FL=gb:NM_012937.1	NM_012937	Rn.10350	Rn.10350	November 2004 (Baylor College of Medicine HGSC Rnor3.4)	---	crystallin, beta B2	Crybb2	---	full length	---	25422	P62697	---	---	NP_037069	NM_012937	---	---	---	---	---	---	0007601 // visual perception // not recorded /// 0043010 // camera-type eye development // inferred from expression pattern /// 0043010 // camera-type eye development // not recorded	---	0005212 // structural constituent of eye lens // inferred from electronic annotation /// 0005212 // structural constituent of eye lens // not recorded /// 0042803 // protein homodimerization activity // not recorded	---
1367685_at	14.2791	14.2887	14.2167	14.3358	13.8194	13.9531	13.7854	13.8616	P	P	P	P	P	P	P	P	Rat Expression Array 230 2.0	Rattus norvegicus	2011-06-09	Consensus sequence	GenBank	Rn.6014.1	gb:NM_031113.1 /DB_XREF=gi:13592076 /GEN=Rps27a /FEA=FLmRNA /CNT=43 /TID=Rn.6014.1 /TIER=FL+Stack /STK=23 /UG=Rn.6014 /LL=81777 /DEF=Rattus norvegicus ribosomal protein S27a (Rps27a), mRNA. /PROD=ribosomal protein S27a /FL=gb:NM_031113.1	NM_031113	Rn.6014	Rn.106034	November 2004 (Baylor College of Medicine HGSC Rnor3.4)	chr1:241205743-241206372 (-) // 94.72 // q43 /// chr14:110559625-110561451 (-) // 95.77 // /// chr18:25059275-25059969 (-) // 91.2 // q12.1 /// chr5:140170376-140170933 (-) // 97.54 // q31.3 /// chrX:90631794-90632333 (-) // 90.49 // q21.31	ribosomal protein S27a	Rps27a	chr14q22	full length	ENSRNOG00000004426 /// ENSRNOG00000034246	81777	P62982 /// P62989 /// P97621 /// Q6PED0	---	---	NP_112375	NM_031113	---	---	---	---	---	---	0006412 // translation // inferred from electronic annotation /// 0006414 // translational elongation // not recorded /// 0016567 // protein ubiquitination // inferred from electronic annotation /// 0045941 // positive regulation of transcription // inferred from electronic annotation	0005622 // intracellular // inferred from electronic annotation /// 0005634 // nucleus // inferred from electronic annotation /// 0005737 // cytoplasm // inferred from electronic annotation /// 0005829 // cytosol // not recorded /// 0005840 // ribosome // inferred from electronic annotation /// 0015935 // small ribosomal subunit // not recorded /// 0022627 // cytosolic small ribosomal subunit // …	0003735 // structural constituent of ribosome // not recorded /// 0003735 // structural constituent of ribosome // inferred from electronic annotation /// 0005515 // protein binding // inferred from electronic annotation /// 0030528 // transcription regulator activity // inferred from electronic annotation /// 0046872 // metal ion binding // inferred from electronic annotation	---
1367686_at	12.7815	12.7672	12.7211	12.8547	12.4183	12.4192	12.3781	12.2654	P	P	P	P	P	P	P	P	Rat Expression Array 230 2.0	Rattus norvegicus	2011-06-09	Consensus sequence	GenBank	Rn.2119.1	gb:NM_030835.1 /DB_XREF=gi:13540635 /GEN=RAMP4 /FEA=FLmRNA /CNT=51 /TID=Rn.2119.1 /TIER=FL+Stack /STK=23 /UG=Rn.2119 /LL=80881 /DEF=Rattus norvegicus ribosome associated membrane protein 4 (RAMP4), mRNA. /PROD=ribosome associated membrane protein 4 /FL=gb:AB018546.1 gb:AF100470.1 gb:NM_030835.1	NM_030835	Rn.2119	Rn.2119	November 2004 (Baylor College of Medicine HGSC Rnor3.4)	chr2:147866071-147869956 (-) // 97.65 // q22.3	stress-associated endoplasmic reticulum protein 1	Serp1	chr2q31	full length	---	80881	Q9R2C1	---	---	NP_110462	NM_030835	---	---	---	---	---	---	0001501 // skeletal system development // inferred from electronic annotation /// 0001501 // skeletal system development // not recorded /// 0006006 // glucose metabolic process // inferred from electronic annotation /// 0006006 // glucose metabolic process // not recorded /// 0006486 // protein glycosylation // inferred from direct assay /// 0006810 // transport // inferred from electronic annot…	0005783 // endoplasmic reticulum // inferred from electronic annotation /// 0005789 // endoplasmic reticulum membrane // inferred from electronic annotation /// 0016020 // membrane // inferred from electronic annotation /// 0016021 // integral to membrane // inferred from electronic annotation	---	---
1367687_a_at	11.6096	11.6635	11.8252	11.8246	9.86568	9.77569	9.9989	10.1093	P	P	P	P	P	P	P	P	Rat Expression Array 230 2.0	Rattus norvegicus	2011-06-09	Consensus sequence	GenBank	Rn.1121.2	gb:M25719.1 /DB_XREF=gi:206024 /FEA=FLmRNA /CNT=23 /TID=Rn.1121.2 /TIER=FL /STK=1 /UG=Rn.1121 /LL=25508 /UG_GENE=Pam /UG_TITLE=Peptidylglycine alpha-amidating monooxygenase /DEF=Rat peptidyl-glycine alpha-amidating monooxygenase (rPAM-2) mRNA, complete cds. /FL=gb:M25719.1	M25719	Rn.1121	Rn.1121	November 2004 (Baylor College of Medicine HGSC Rnor3.4)	chr9:96892023-97047528 (+) // 97.97 // q22.32	peptidylglycine alpha-amidating monooxygenase	Pam	chr9q36	full length	---	25508	D3ZH61 /// D4A1N9 /// D4AEC8 /// P14925	EC:1.14.17.3 /// EC:4.3.2.5	---	NP_037132	NM_013000	---	---	---	---	---	---	0001666 // response to hypoxia // inferred from expression pattern /// 0006518 // peptide metabolic process // inferred from electronic annotation /// 0007417 // central nervous system development // inferred from expression pattern /// 0007507 // heart development // inferred from expression pattern /// 0007595 // lactation // inferred from expression pattern /// 0009268 // response to pH // inf…	0005615 // extracellular space // inferred from direct assay /// 0005624 // membrane fraction // inferred from direct assay /// 0016020 // membrane // inferred from electronic annotation /// 0016021 // integral to membrane // inferred from electronic annotation /// 0030141 // stored secretory granule // inferred from direct assay /// 0030658 // transport vesicle membrane // inferred from electron…	0003824 // catalytic activity // inferred from electronic annotation /// 0004497 // monooxygenase activity // inferred from electronic annotation /// 0004504 // peptidylglycine monooxygenase activity // inferred from direct assay /// 0004504 // peptidylglycine monooxygenase activity // inferred from electronic annotation /// 0004598 // peptidylamidoglycolate lyase activity // inferred from direct…	---
1367688_at	6.78915	6.72252	7.06304	6.97222	7.53002	8.02359	8.04167	7.80883	P	P	P	P	P	P	P	P	Rat Expression Array 230 2.0	Rattus norvegicus	2011-06-09	Consensus sequence	GenBank	Rn.7309.1	gb:NM_031725.1 /DB_XREF=gi:13929017 /GEN=Scamp4 /FEA=FLmRNA /CNT=29 /TID=Rn.7309.1 /TIER=FL+Stack /STK=23 /UG=Rn.7309 /LL=65170 /DEF=Rattus norvegicus secretory carrier membrane protein 4 (Scamp4), mRNA. /PROD=secretory carrier membrane protein 4 /FL=gb:AF285631.1 gb:NM_031725.1	NM_031725	Rn.7309	Rn.7309	November 2004 (Baylor College of Medicine HGSC Rnor3.4)	chr7:10612351-10624804 (-) // 99.89 // p21.3	secretory carrier membrane protein 4	Scamp4	chr7q11	full length	ENSRNOG00000018271	65170	Q5EAN5 /// Q9ET20	---	---	NP_113913	NM_031725	---	---	---	---	---	---	0006810 // transport // inferred from electronic annotation /// 0015031 // protein transport // inferred from electronic annotation /// 0019098 // reproductive behavior // non-traceable author statement	0016020 // membrane // inferred from electronic annotation /// 0016021 // integral to membrane // inferred from electronic annotation /// 0030133 // transport vesicle // inferred from direct assay	---	---
1367689_a_at	6.14891	6.55551	6.87045	6.35655	4.72518	4.24918	4.41783	4.0438	P	P	P	P	P	P	P	P	Rat Expression Array 230 2.0	Rattus norvegicus	2011-06-09	Consensus sequence	GenBank	Rn.3790.1	gb:AF072411.1 /DB_XREF=gi:3273896 /FEA=FLmRNA /CNT=38 /TID=Rn.3790.1 /TIER=FL /STK=1 /UG=Rn.3790 /LL=29184 /UG_GENE=Cd36 /DEF=Rattus norvegicus fatty acid translocaseCD36 mRNA, complete cds. /PROD=fatty acid translocaseCD36 /FL=gb:AF072411.1 gb:NM_031561.1 gb:L19658.1 gb:AF113914.1	AF072411	Rn.3790	Rn.102418	November 2004 (Baylor College of Medicine HGSC Rnor3.4)	chr4:13471877-13554419 (+) // 99.14 // p15.33 /// chr4:13487281-13670270 (+) // 96.79 // p15.33 /// chr4:13481324-13525620 (+) // 86.65 // p15.33	CD36 molecule (thrombospondin receptor)	Cd36	chr4q11	full length	ENSRNOG00000005906	29184	D4A8Z2 /// O35754 /// Q07969 /// Q1XIH4 /// Q6IMX5 /// Q794J1	---	---	NP_113749	NM_031561	---	---	---	---	---	---	0001676 // long-chain fatty acid metabolic process // inferred from mutant phenotype /// 0001954 // positive regulation of cell-matrix adhesion // not recorded /// 0002221 // pattern recognition receptor signaling pathway // not recorded /// 0006631 // fatty acid metabolic process // inferred from direct assay /// 0006631 // fatty acid metabolic process // inferred from mutant phenotype /// 00066…	0005622 // intracellular // inferred from direct assay /// 0005739 // mitochondrion // inferred from direct assay /// 0005792 // microsome // inferred from direct assay /// 0005794 // Golgi apparatus // not recorded /// 0005886 // plasma membrane // inferred from direct assay /// 0005886 // plasma membrane // not recorded /// 0005901 // caveola // inferred from direct assay /// 0009897 // externa…	0004872 // receptor activity // inferred from genetic interaction /// 0004872 // receptor activity // inferred from electronic annotation /// 0005041 // low-density lipoprotein receptor activity // not recorded /// 0005504 // fatty acid binding // traceable author statement /// 0005515 // protein binding // inferred from physical interaction /// 0008035 // high-density lipoprotein binding // not …	---
1367690_at	12.5724	12.5303	12.6581	12.6884	12.0321	12.0763	12.0102	12.037	P	P	P	P	P	P	P	P	Rat Expression Array 230 2.0	Rattus norvegicus	2011-06-09	Consensus sequence	GenBank	Rn.1999.1	gb:NM_017199.1 /DB_XREF=gi:8394363 /GEN=Ssr4 /FEA=FLmRNA /CNT=34 /TID=Rn.1999.1 /TIER=FL+Stack /STK=23 /UG=Rn.1999 /LL=29435 /DEF=Rattus norvegicus signal sequence receptor, delta (Ssr4), mRNA. /PROD=signal sequence receptor, delta /FL=gb:NM_017199.1	NM_017199	Rn.1999	Rn.1999	November 2004 (Baylor College of Medicine HGSC Rnor3.4)	chrX:159710428-159714525 (+) // 98.75 //	signal sequence receptor, delta	Ssr4	chrXq37	full length	ENSRNOG00000037283	29435	D3ZLI8 /// Q07984	---	---	NP_058895	NM_017199	---	---	---	---	---	---	---	0005783 // endoplasmic reticulum // inferred from electronic annotation /// 0005783 // endoplasmic reticulum // traceable author statement /// 0005784 // Sec61 translocon complex // inferred from direct assay /// 0005789 // endoplasmic reticulum membrane // inferred from electronic annotation /// 0016020 // membrane // inferred from electronic annotation /// 0016021 // integral to membrane // inf…	0005515 // protein binding // not recorded	---
1367691_at	12.6861	12.6966	12.8252	12.8389	11.881	12.0416	12.0318	12.0954	P	P	P	P	P	P	P	P	Rat Expression Array 230 2.0	Rattus norvegicus	2011-06-09	Consensus sequence	GenBank	Rn.12281.1	gb:NM_134449.1 /DB_XREF=gi:19745163 /GEN=SRBC /FEA=FLmRNA /CNT=25 /TID=Rn.12281.1 /TIER=FL+Stack /STK=23 /UG=Rn.12281 /LL=85332 /DEF=Rattus norvegicus PKC-delta binding protein (SRBC), mRNA. /PROD=PKC-delta binding protein /FL=gb:D85435.1 gb:NM_134449.1	NM_134449	Rn.12281	Rn.12281	November 2004 (Baylor College of Medicine HGSC Rnor3.4)	chr1:163212920-163214511 (-) // 96.15 // q23.3	protein kinase C, delta binding protein	Prkcdbp	chr1q33	full length	ENSRNOG00000017914	85332	Q9Z1H9	---	---	NP_604444	NM_134449	---	---	---	---	---	---	0001558 // regulation of cell growth // non-traceable author statement	---	0005080 // protein kinase C binding // inferred from direct assay /// 0005080 // protein kinase C binding // not recorded /// 0005080 // protein kinase C binding // inferred from electronic annotation	---
1367692_at	2.38019	2.54114	2.31538	2.43373	2.71558	2.69018	2.59446	2.71235	A	A	A	A	A	A	A	A	Rat Expression Array 230 2.0	Rattus norvegicus	2011-06-09	Consensus sequence	GenBank	Rn.9914.1	gb:NM_013024.1 /DB_XREF=gi:6981501 /GEN=Sbp /FEA=FLmRNA /CNT=23 /TID=Rn.9914.1 /TIER=FL+Stack /STK=23 /UG=Rn.9914 /LL=25540 /DEF=Rattus norvegicus Spermine binding protein (Sbp), mRNA. /PROD=spermine binding protein /FL=gb:J02675.1 gb:NM_013024.1	NM_013024	Rn.9914	Rn.9914	November 2004 (Baylor College of Medicine HGSC Rnor3.4)	chr10:13183519-13186892 (+) // 49.68 // p13	spermine binding protein	Sbp	chr10q12	full length	---	25540	P08723	---	---	NP_037156	NM_013024	---	---	---	---	---	---	---	---	0019808 // polyamine binding // traceable author statement	---
1367693_at	12.559	12.5884	12.5994	12.5802	12.6446	12.7568	12.6982	12.6214	P	P	P	P	P	P	P	P	Rat Expression Array 230 2.0	Rattus norvegicus	2011-06-09	Consensus sequence	GenBank	Rn.3324.1	gb:NM_013052.1 /DB_XREF=gi:6981709 /GEN=Ywhah /FEA=FLmRNA /CNT=41 /TID=Rn.3324.1 /TIER=FL+Stack /STK=22 /UG=Rn.3324 /LL=25576 /DEF=Rattus norvegicus Tyrosine 3-monooxygenasetryptophan 5-monooxygenase activation protein, eta polypeptide (Ywhah), mRNA. /PROD=tyrosine 3-monooxygenasetryptophan5-monooxygenase activation protein, eta polypeptide /FL=gb:NM_013052.1 gb:D17445.1	NM_013052	Rn.3324	Rn.3324	November 2004 (Baylor College of Medicine HGSC Rnor3.4)	chr14:83448400-83457778 (-) // 96.52 // q31.1	tyrosine 3-monooxygenase/tryptophan 5-monooxygenase activation protein, eta polypeptide	Ywhah	chr14q21	full length	ENSRNOG00000026119	25576	P68511	---	---	NP_037184	NM_013052	---	---	---	---	---	---	0006713 // glucocorticoid catabolic process // inferred from electronic annotation /// 0006713 // glucocorticoid catabolic process // not recorded /// 0006886 // intracellular protein transport // inferred from electronic annotation /// 0006886 // intracellular protein transport // not recorded /// 0007165 // signal transduction // traceable author statement /// 0042069 // regulation of catechola…	0005737 // cytoplasm // inferred from electronic annotation /// 0005737 // cytoplasm // not recorded	0003779 // actin binding // inferred from electronic annotation /// 0003779 // actin binding // not recorded /// 0005515 // protein binding // not recorded /// 0005515 // protein binding // inferred from electronic annotation /// 0016563 // transcription activator activity // inferred from electronic annotation /// 0016563 // transcription activator activity // not recorded /// 0019899 // enzyme …	---
1367694_at	11.3803	11.3674	11.4999	11.5327	11.2934	11.436	11.3769	11.3383	P	P	P	P	P	P	P	P	Rat Expression Array 230 2.0	Rattus norvegicus	2011-06-09	Consensus sequence	GenBank	Rn.11253.1	gb:NM_133618.1 /DB_XREF=gi:19424337 /GEN=Hadhb /FEA=FLmRNA /CNT=39 /TID=Rn.11253.1 /TIER=FL+Stack /STK=22 /UG=Rn.11253 /LL=171155 /DEF=Rattus norvegicus hydroxyacyl-Coenzyme A dehydrogenase3-ketoacyl-Coenzyme A thiolaseenoyl-Coenzyme A hydratase (trifunctional protein), beta subunit (Hadhb), mRNA. /PROD=hydroxyacyl-Coenzyme Adehydrogenase3-ketoacyl-Coenzyme Athiolaseenoyl-Coenzyme A hydratase (tr…	NM_133618	Rn.11253	Rn.11253	November 2004 (Baylor College of Medicine HGSC Rnor3.4)	chr6:26139395-26166947 (-) // 99.22 // p22.2	hydroxyacyl-Coenzyme A dehydrogenase/3-ketoacyl-Coenzyme A thiolase/enoyl-Coenzyme A hydratase (trifunctional protein), beta subunit	Hadhb	chr6q14	full length	ENSRNOG00000010800	171155	Q60587	EC:2.3.1.16	---	NP_598302	NM_133618	---	---	---	---	---	---	0006629 // lipid metabolic process // inferred from electronic annotation /// 0006631 // fatty acid metabolic process // inferred from electronic annotation /// 0006635 // fatty acid beta-oxidation // inferred from direct assay /// 0008152 // metabolic process // not recorded /// 0008152 // metabolic process // inferred from electronic annotation	0005739 // mitochondrion // inferred from direct assay /// 0005739 // mitochondrion // not recorded /// 0005739 // mitochondrion // inferred from electronic annotation /// 0005743 // mitochondrial inner membrane // inferred from electronic annotation /// 0005743 // mitochondrial inner membrane // not recorded /// 0005759 // mitochondrial matrix // not recorded /// 0005759 // mitochondrial matrix …	0000062 // acyl-CoA binding // inferred from direct assay /// 0003824 // catalytic activity // inferred from electronic annotation /// 0003857 // 3-hydroxyacyl-CoA dehydrogenase activity // inferred from direct assay /// 0003988 // acetyl-CoA C-acyltransferase activity // inferred from direct assay /// 0003988 // acetyl-CoA C-acyltransferase activity // not recorded /// 0003988 // acetyl-CoA C-ac…	Fatty_Acid_Degradation // GenMAPP
1367695_at	9.63994	9.73121	9.90181	9.63884	11.6377	11.6171	11.5937	11.5347	P	P	P	P	P	P	P	P	Rat Expression Array 230 2.0	Rattus norvegicus	2011-06-09	Consensus sequence	GenBank	Rn.241.1	gb:NM_022390.1 /DB_XREF=gi:11693159 /GEN=Qdpr /FEA=FLmRNA /CNT=30 /TID=Rn.241.1 /TIER=FL+Stack /STK=22 /UG=Rn.241 /LL=64192 /DEF=Rattus norvegicus quinoid dihydropteridine reductase (Qdpr), mRNA. /PROD=quinoid dihydropteridine reductase /FL=gb:NM_022390.1 gb:J03481.1	NM_022390	Rn.241	Rn.241	November 2004 (Baylor College of Medicine HGSC Rnor3.4)	chr14:70741997-70755603 (+) // 99.54 // q24.2	quinoid dihydropteridine reductase	Qdpr	chr14q21	full length	ENSRNOG00000003253	64192	P11348	EC:1.5.1.34	---	NP_071785	NM_022390	---	---	---	---	---	---	0006729 // tetrahydrobiopterin biosynthetic process // inferred from direct assay /// 0006729 // tetrahydrobiopterin biosynthetic process // inferred from mutant phenotype /// 0006729 // tetrahydrobiopterin biosynthetic process // traceable author statement /// 0006729 // tetrahydrobiopterin biosynthetic process // inferred from electronic annotation /// 0008152 // metabolic process // inferred f…	0005625 // soluble fraction // inferred from direct assay /// 0005737 // cytoplasm // inferred from electronic annotation /// 0005737 // cytoplasm // not recorded /// 0005739 // mitochondrion // inferred from electronic annotation /// 0005739 // mitochondrion // not recorded /// 0019717 // synaptosome // inferred from direct assay	0003824 // catalytic activity // inferred from electronic annotation /// 0004155 // 6,7-dihydropteridine reductase activity // inferred from direct assay /// 0004155 // 6,7-dihydropteridine reductase activity // inferred from mutant phenotype /// 0004155 // 6,7-dihydropteridine reductase activity // inferred from electronic annotation /// 0005488 // binding // inferred from electronic annotation …	---
1367696_at	12.2488	12.3142	12.4063	12.3997	11.2171	11.2156	11.2414	11.1921	P	P	P	P	P	P	P	P	Rat Expression Array 230 2.0	Rattus norvegicus	2011-06-09	Consensus sequence	GenBank	Rn.2648.1	gb:NM_030833.1 /DB_XREF=gi:13540633 /GEN=LOC80875 /FEA=FLmRNA /CNT=33 /TID=Rn.2648.1 /TIER=FL+Stack /STK=22 /UG=Rn.2648 /LL=80875 /DEF=Rattus norvegicus interferon-inducible protein 16 (LOC80875), mRNA. /PROD=interferon-inducible protein 16 /FL=gb:AF164040.1 gb:NM_030833.1	NM_030833	Rn.2648	Rn.108174	November 2004 (Baylor College of Medicine HGSC Rnor3.4)	chr1:201134356-201135537 (-) // 96.18 // q32.1	interferon induced transmembrane protein 2	Ifitm2	chr1q41	full length	ENSRNOG00000014936	114709	Q9R175	---	---	NP_110460	NM_030833	---	---	---	---	---	---	0009607 // response to biotic stimulus // inferred from electronic annotation	0016021 // integral to membrane // inferred from electronic annotation	0005515 // protein binding // not recorded	---
1367697_at	9.27885	9.20626	9.59351	9.4341	10.069	10.16	10.2549	10.0365	P	P	P	P	P	P	P	P	Rat Expression Array 230 2.0	Rattus norvegicus	2011-06-09	Consensus sequence	GenBank	Rn.3293.1	gb:NM_031020.1 /DB_XREF=gi:13591927 /GEN=Mapk14 /FEA=FLmRNA /CNT=37 /TID=Rn.3293.1 /TIER=FL+Stack /STK=22 /UG=Rn.3293 /LL=81649 /DEF=Rattus norvegicus p38 mitogen activated protein kinase (Mapk14), mRNA. /PROD=p38 mitogen activated protein kinase /FL=gb:AF346293.1 gb:NM_031020.1 gb:U73142.1 gb:U91847.1	NM_031020	Rn.3293	Rn.88085	November 2004 (Baylor College of Medicine HGSC Rnor3.4)	chr20:6939540-7000377 (+) // 96.61 // p12.3	mitogen activated protein kinase 14	Mapk14	chr20p12	full length	ENSRNOG00000000513	81649	D3ZBH3 /// P70618 /// Q56A33	EC:2.7.11.24	---	NP_112282	NM_031020	---	---	---	---	---	---	0000077 // DNA damage checkpoint // inferred from electronic annotation /// 0000077 // DNA damage checkpoint // not recorded /// 0000902 // cell morphogenesis // inferred from electronic annotation /// 0000902 // cell morphogenesis // not recorded /// 0001525 // angiogenesis // inferred from electronic annotation /// 0001525 // angiogenesis // not recorded /// 0002062 // chondrocyte differentiati…	0000922 // spindle pole // inferred from electronic annotation /// 0000922 // spindle pole // not recorded /// 0005623 // cell // inferred from electronic annotation /// 0005623 // cell // not recorded /// 0005625 // soluble fraction // inferred from direct assay /// 0005634 // nucleus // inferred from direct assay /// 0005634 // nucleus // not recorded /// 0005634 // nucleus // inferred from seq…	0000166 // nucleotide binding // inferred from electronic annotation /// 0004672 // protein kinase activity // not recorded /// 0004672 // protein kinase activity // inferred from electronic annotation /// 0004674 // protein serine/threonine kinase activity // inferred from electronic annotation /// 0004674 // protein serine/threonine kinase activity // not recorded /// 0004707 // MAP kinase acti…	MAPK_Cascade // GenMAPP /// Oxidative_Stress // GenMAPP
1367698_a_at	6.48073	6.54584	6.89954	6.25277	7.08129	7.16486	7.36703	7.32153	P	P	P	P	P	P	P	P	Rat Expression Array 230 2.0	Rattus norvegicus	2011-06-09	Consensus sequence	GenBank	Rn.2106.1	gb:NM_031837.1 /DB_XREF=gi:13929199 /GEN=LOC83788 /FEA=FLmRNA /CNT=29 /TID=Rn.2106.1 /TIER=FL+Stack /STK=22 /UG=Rn.2106 /LL=83788 /DEF=Rattus norvegicus E-septin (LOC83788), mRNA. /PROD=E-septin /FL=gb:NM_031837.1 gb:AF180526.1 gb:AF180525.1 gb:AF170253.1	NM_031837	Rn.2106	Rn.91127	November 2004 (Baylor College of Medicine HGSC Rnor3.4)	chr10:107343671-107479953 (+) // 95.81 // q25.1	septin 9	2012-09-09	chr10q32.3	full length	ENSRNOG00000002807	83788	B2GVB4 /// Q9QZR6	---	---	NP_001106969 /// NP_114025 /// NP_789826	NM_001113497 /// NM_031837 /// NM_176856	---	---	---	---	---	---	0007049 // cell cycle // inferred from electronic annotation /// 0051291 // protein heterooligomerization // not recorded /// 0051291 // protein heterooligomerization // inferred from electronic annotation /// 0051301 // cell division // inferred from electronic annotation	0001725 // stress fiber // not recorded /// 0001725 // stress fiber // inferred from electronic annotation /// 0005737 // cytoplasm // inferred from electronic annotation /// 0005856 // cytoskeleton // inferred from electronic annotation /// 0005874 // microtubule // not recorded /// 0005874 // microtubule // inferred from electronic annotation /// 0048471 // perinuclear region of cytoplasm // no…	0000166 // nucleotide binding // inferred from electronic annotation /// 0005515 // protein binding // not recorded /// 0005515 // protein binding // inferred from electronic annotation /// 0005525 // GTP binding // inferred from electronic annotation	---
1367699_at	7.99721	8.20175	8.58476	8.16784	7.68913	8.34434	8.47995	8.40967	P	P	P	P	P	P	P	P	Rat Expression Array 230 2.0	Rattus norvegicus	2011-06-09	Consensus sequence	GenBank	Rn.8762.1	gb:AB008161.1 /DB_XREF=gi:2558488 /GEN=sh3p8 /FEA=FLmRNA /CNT=29 /TID=Rn.8762.1 /TIER=FL+Stack /STK=22 /UG=Rn.8762 /LL=81922 /DEF=Rattus norvegicus mRNA for SH3P8, complete cds. /PROD=SH3P8 /FL=gb:NM_031239.1 gb:AF009602.1 gb:AB008161.1	AB008161	Rn.8762	Rn.8762	November 2004 (Baylor College of Medicine HGSC Rnor3.4)	---	SH3-domain GRB2-like 1	Sh3gl1	---	full length	---	81922	O35964	---	---	NP_112518	NM_031239	---	---	---	---	---	---	0006897 // endocytosis // inferred from electronic annotation	0005625 // soluble fraction // inferred from direct assay /// 0005626 // insoluble fraction // inferred from direct assay /// 0005737 // cytoplasm // inferred from electronic annotation /// 0005768 // endosome // inferred from electronic annotation /// 0016020 // membrane // inferred from electronic annotation /// 0031901 // early endosome membrane // inferred from electronic annotation	0005515 // protein binding // inferred from physical interaction /// 0005515 // protein binding // inferred from electronic annotation /// 0008289 // lipid binding // inferred from electronic annotation /// 0019902 // phosphatase binding // inferred from physical interaction /// 0051020 // GTPase binding // inferred from physical interaction	---
1367700_at	11.3669	11.6075	11.901	11.4964	7.94759	7.96848	8.17534	7.73166	P	P	P	P	P	P	P	P	Rat Expression Array 230 2.0	Rattus norvegicus	2011-06-09	Consensus sequence	GenBank	Rn.8778.1	gb:NM_080698.1 /DB_XREF=gi:18104932 /GEN=Fmod /FEA=FLmRNA /CNT=28 /TID=Rn.8778.1 /TIER=FL+Stack /STK=22 /UG=Rn.8778 /LL=64507 /DEF=Rattus norvegicus fibromodulin (Fmod), mRNA. /PROD=fibromodulin /FL=gb:NM_080698.1	NM_080698	Rn.8778	Rn.8778	November 2004 (Baylor College of Medicine HGSC Rnor3.4)	chr13:46987713-46998689 (+) // 96.13 // q14.13	fibromodulin	Fmod	chr13q13	full length	ENSRNOG00000003183	64507	P50609	---	---	NP_542429	NM_080698	---	---	---	---	---	---	0042060 // wound healing // inferred from expression pattern /// 0042476 // odontogenesis // inferred from expression pattern	0005576 // extracellular region // inferred from direct assay /// 0005576 // extracellular region // inferred from electronic annotation /// 0005578 // proteinaceous extracellular matrix // inferred from electronic annotation /// 0005615 // extracellular space // not recorded /// 0005622 // intracellular // inferred from direct assay /// 0031012 // extracellular matrix // inferred from direct ass…	0005515 // protein binding // inferred from electronic annotation	---
1367701_at	2.74253	2.58499	2.72665	2.76754	2.42644	2.27914	2.32061	2.5168	P	P	P	P	M	P	M	P	Rat Expression Array 230 2.0	Rattus norvegicus	2011-06-09	Consensus sequence	GenBank	Rn.31482.1	gb:NM_031646.1 /DB_XREF=gi:13928891 /GEN=Ramp2 /FEA=FLmRNA /CNT=26 /TID=Rn.31482.1 /TIER=FL+Stack /STK=22 /UG=Rn.31482 /LL=58966 /DEF=Rattus norvegicus receptor (calcitonin) activity modifying protein 2 (Ramp2), mRNA. /PROD=receptor-activity modifying protein 2 /FL=gb:AB042888.1 gb:AB030943.1 gb:AF181551.1 gb:NM_031646.1	NM_031646	Rn.31482	Rn.107168	November 2004 (Baylor College of Medicine HGSC Rnor3.4)	chr10:90275454-90277245 (+) // 89.19 // q23.31	receptor (G protein-coupled) activity modifying protein 2	Ramp2	chr10q32.1	full length	ENSRNOG00000020415	58966	A5YW89 /// Q9JHJ1 /// Q9R180 /// Q9WVQ3	---	---	NP_113834	NM_031646	---	---	---	---	---	---	0001666 // response to hypoxia // inferred from expression pattern /// 0006810 // transport // inferred from electronic annotation /// 0006886 // intracellular protein transport // inferred from electronic annotation /// 0007165 // signal transduction // not recorded /// 0007186 // G-protein coupled receptor protein signaling pathway // not recorded /// 0007186 // G-protein coupled receptor prote…	0016020 // membrane // inferred from electronic annotation /// 0016021 // integral to membrane // inferred from electronic annotation	0001664 // G-protein-coupled receptor binding // non-traceable author statement /// 0004872 // receptor activity // inferred from electronic annotation /// 0008565 // protein transporter activity // inferred from electronic annotation /// 0015026 // coreceptor activity // inferred from direct assay /// 0015026 // coreceptor activity // not recorded /// 0046982 // protein heterodimerization activi…	Smooth_muscle_contraction // GenMAPP
1367702_at	8.04412	8.22447	8.34905	8.05975	6.45343	6.47409	6.48784	6.76916	P	P	P	P	P	P	P	P	Rat Expression Array 230 2.0	Rattus norvegicus	2011-06-09	Consensus sequence	GenBank	Rn.6302.1	gb:NM_016986.1 /DB_XREF=gi:8392832 /GEN=Acadm /FEA=FLmRNA /CNT=25 /TID=Rn.6302.1 /TIER=FL+Stack /STK=22 /UG=Rn.6302 /LL=24158 /DEF=Rattus norvegicus Acyl-Coenzyme A dehydrogenase, C-4 to C-12 straight-chain (Acadm), mRNA. /PROD=acyl-Coenzyme A dehydrogenase, C-4 to C-12straight-chain /FL=gb:J02791.1 gb:NM_016986.1	NM_016986	Rn.6302	Rn.6302	November 2004 (Baylor College of Medicine HGSC Rnor3.4)	chr2:251866642-251890729 (-) // 99.95 //	acyl-Coenzyme A dehydrogenase, C-4 to C-12 straight chain	Acadm	chr2q45	full length	ENSRNOG00000009845	24158	P08503	---	---	NP_058682	NM_016986	---	---	---	---	---	---	0001889 // liver development // inferred from electronic annotation /// 0001889 // liver development // not recorded /// 0005978 // glycogen biosynthetic process // inferred from electronic annotation /// 0005978 // glycogen biosynthetic process // not recorded /// 0006082 // organic acid metabolic process // inferred from electronic annotation /// 0006082 // organic acid metabolic process // not…	0005739 // mitochondrion // inferred from direct assay /// 0005739 // mitochondrion // not recorded /// 0005739 // mitochondrion // traceable author statement /// 0005739 // mitochondrion // inferred from electronic annotation /// 0005759 // mitochondrial matrix // inferred from direct assay /// 0005759 // mitochondrial matrix // inferred from electronic annotation /// 0031966 // mitochondrial me…	0000062 // acyl-CoA binding // inferred from direct assay /// 0003995 // acyl-CoA dehydrogenase activity // inferred from direct assay /// 0003995 // acyl-CoA dehydrogenase activity // not recorded /// 0003995 // acyl-CoA dehydrogenase activity // inferred from sequence or structural similarity /// 0003995 // acyl-CoA dehydrogenase activity // inferred from electronic annotation /// 0016491 // ox…	Fatty_Acid_Degradation // GenMAPP /// Mitochondrial_fatty_acid_betaoxidation // GenMAPP
1367703_at	2.32284	2.18759	2.19716	2.2269	2.34407	2.31285	2.3958	2.29437	A	A	A	A	A	A	A	A	Rat Expression Array 230 2.0	Rattus norvegicus	2011-06-09	Consensus sequence	GenBank	Rn.64655.1	gb:NM_033095.1 /DB_XREF=gi:14861861 /GEN=Crygd /FEA=FLmRNA /CNT=24 /TID=Rn.64655.1 /TIER=FL+Stack /STK=22 /UG=Rn.64655 /LL=24278 /DEF=Rattus norvegicus Crystallin, gamma polypeptide 4 (Crygd), mRNA. /PROD=crystallin, gamma polypeptide 4 /FL=gb:NM_033095.1	NM_033095	Rn.64655	Rn.64655	November 2004 (Baylor College of Medicine HGSC Rnor3.4)	chr9:63711034-63712662 (-) // 99.85 // q12	crystallin, gamma D	Crygd	chr9q32	full length	ENSRNOG00000032219	24278	D3ZR45 /// P10067	---	---	NP_149086	NM_033095	---	---	---	---	0	---	0001654 // eye development // inferred from electronic annotation /// 0001654 // eye development // not recorded /// 0002088 // lens development in camera-type eye // inferred from expression pattern /// 0002088 // lens development in camera-type eye // not recorded /// 0002088 // lens development in camera-type eye // inferred from electronic annotation /// 0007601 // visual perception // not re…	0005625 // soluble fraction // not recorded /// 0005634 // nucleus // inferred from electronic annotation /// 0005634 // nucleus // not recorded /// 0005737 // cytoplasm // inferred from electronic annotation /// 0005737 // cytoplasm // not recorded	0005212 // structural constituent of eye lens // inferred from mutant phenotype /// 0005212 // structural constituent of eye lens // not recorded /// 0005212 // structural constituent of eye lens // inferred from electronic annotation /// 0005515 // protein binding // not recorded	---
1367704_at	9.93575	10.1042	10.2274	9.95511	9.55384	9.57328	9.7325	9.59988	P	P	P	P	P	P	P	P	Rat Expression Array 230 2.0	Rattus norvegicus	2011-06-09	Consensus sequence	GenBank	Rn.56138.1	gb:NM_080583.1 /DB_XREF=gi:18034786 /GEN=Ap2b1 /FEA=FLmRNA /CNT=32 /TID=Rn.56138.1 /TIER=FL+Stack /STK=22 /UG=Rn.56138 /LL=140670 /DEF=Rattus norvegicus adaptor-related protein complex 2, beta 1 subunit (Ap2b1), mRNA. /PROD=adaptor-related protein complex 2, beta 1subunit /FL=gb:M77246.1 gb:NM_080583.1	NM_080583	Rn.56138	Rn.56138	November 2004 (Baylor College of Medicine HGSC Rnor3.4)	chr10:71386117-71487996 (+) // 95.83 // q22.1 /// chr17:47894374-47897410 (+) // 52.99 // q21.33 /// chr17:4457140-4462479 (-) // 91.28 // p13.2	adaptor-related protein complex 2, beta 1 subunit	Ap2b1	chr10q26	full length	ENSRNOG00000009988	140670	P62944 /// Q3ZB97	---	---	NP_542150	NM_080583	---	---	---	---	---	---	0006810 // transport // inferred from electronic annotation /// 0006886 // intracellular protein transport // inferred from electronic annotation /// 0007268 // synaptic transmission // inferred from mutant phenotype /// 0007269 // neurotransmitter secretion // inferred from mutant phenotype /// 0015031 // protein transport // inferred from electronic annotation /// 0016192 // vesicle-mediated tr…	0005802 // trans-Golgi network // inferred from direct assay /// 0005829 // cytosol // not recorded /// 0005886 // plasma membrane // inferred from electronic annotation /// 0005886 // plasma membrane // not recorded /// 0005905 // coated pit // inferred from electronic annotation /// 0016020 // membrane // inferred from electronic annotation /// 0030117 // membrane coat // inferred from electron…	0005488 // binding // inferred from electronic annotation /// 0005515 // protein binding // inferred from physical interaction /// 0005515 // protein binding // not recorded /// 0005515 // protein binding // inferred from electronic annotation /// 0008565 // protein transporter activity // inferred from electronic annotation /// 0030276 // clathrin binding // inferred from direct assay /// 003027…	---
1367705_at	5.22734	4.93809	5.28029	5.44156	7.90073	8.34709	8.62569	8.41062	P	P	P	P	P	P	P	P	Rat Expression Array 230 2.0	Rattus norvegicus	2011-06-09	Consensus sequence	GenBank	Rn.1484.1	gb:AF319950.1 /DB_XREF=gi:12746262 /FEA=FLmRNA /CNT=25 /TID=Rn.1484.1 /TIER=FL /STK=1 /UG=Rn.1484 /LL=64045 /UG_GENE=Glrx /DEF=Rattus norvegicus glutaredoxin mRNA, complete cds. /PROD=glutaredoxin /FL=gb:AF319950.1 gb:AF167981.3 gb:NM_022278.1	AF319950	Rn.1484	Rn.1484	November 2004 (Baylor College of Medicine HGSC Rnor3.4)	chr2:2888604-2899223 (+) // 94.43 // p25.3	glutaredoxin 1	Glrx1	chr2q11	full length	ENSRNOG00000012183	64045	Q9ESH6	EC:1.8.4.1	---	NP_071614	NM_022278	---	---	---	---	---	---	0006810 // transport // inferred from electronic annotation /// 0022900 // electron transport chain // inferred from electronic annotation /// 0045454 // cell redox homeostasis // inferred from electronic annotation	0005737 // cytoplasm // inferred from electronic annotation /// 0005739 // mitochondrion // not recorded /// 0005829 // cytosol // not recorded	0009055 // electron carrier activity // inferred from electronic annotation /// 0015035 // protein disulfide oxidoreductase activity // inferred from electronic annotation /// 0015038 // glutathione disulfide oxidoreductase activity // not recorded /// 0047485 // protein N-terminus binding // not recorded	---
1367706_at	12.1588	12.2722	12.4991	12.4115	12.5887	12.604	12.5357	12.4667	P	P	P	P	P	P	P	P	Rat Expression Array 230 2.0	Rattus norvegicus	2011-06-09	Consensus sequence	GenBank	Rn.54594.1	gb:NM_031353.1 /DB_XREF=gi:13786199 /GEN=Vdac1 /FEA=FLmRNA /CNT=40 /TID=Rn.54594.1 /TIER=FL+Stack /STK=21 /UG=Rn.54594 /LL=83529 /DEF=Rattus norvegicus voltage-dependent anion channel 1 (Vdac1), mRNA. /PROD=voltage-dependent anion channel 1 /FL=gb:AB039662.1 gb:AF268467.1 gb:NM_031353.1	NM_031353	Rn.54594	Rn.54594	November 2004 (Baylor College of Medicine HGSC Rnor3.4)	chr10:37808155-37823003 (+) // 79.55 // p11.21 /// chr6:86576050-86577856 (+) // 90.13 // q14.3 /// chr18:52294202-52295996 (-) // 90.9 // q21.2 /// chrX:153836269-153838064 (-) // 94.63 // q28	voltage-dependent anion channel 1	Vdac1	chr10q22	full length	---	83529	Q9Z2L0	---	---	NP_112643	NM_031353	---	---	---	---	---	---	0001662 // behavioral fear response // not recorded /// 0006810 // transport // inferred from electronic annotation /// 0006811 // ion transport // inferred from electronic annotation /// 0006820 // anion transport // inferred from electronic annotation /// 0006851 // mitochondrial calcium ion transport // inferred from direct assay /// 0006915 // apoptosis // inferred from electronic annotation …	0005739 // mitochondrion // inferred from electronic annotation /// 0005739 // mitochondrion // not recorded /// 0005741 // mitochondrial outer membrane // inferred from direct assay /// 0005741 // mitochondrial outer membrane // inferred from electronic annotation /// 0005743 // mitochondrial inner membrane // not recorded /// 0005886 // plasma membrane // inferred from electronic annotation ///…	0000166 // nucleotide binding // inferred from electronic annotation /// 0005253 // anion channel activity // inferred from direct assay /// 0005515 // protein binding // inferred from physical interaction /// 0005515 // protein binding // not recorded /// 0008308 // voltage-gated anion channel activity // inferred from direct assay /// 0008308 // voltage-gated anion channel activity // not recor…	---
1367707_at	7.32298	7.66232	8.22503	7.22907	9.77375	9.66026	9.82188	9.72909	P	P	P	P	P	P	P	P	Rat Expression Array 230 2.0	Rattus norvegicus	2011-06-09	Consensus sequence	GenBank	Rn.9486.1	gb:NM_017332.1 /DB_XREF=gi:8394157 /GEN=Fasn /FEA=FLmRNA /CNT=58 /TID=Rn.9486.1 /TIER=FL+Stack /STK=21 /UG=Rn.9486 /LL=50671 /DEF=Rattus norvegicus fatty acid synthase (Fasn), mRNA. /PROD=fatty acid synthase /FL=gb:M76767.1 gb:NM_017332.1	NM_017332	Rn.9486	Rn.9486	November 2004 (Baylor College of Medicine HGSC Rnor3.4)	---	fatty acid synthase	Fasn	---	full length	---	50671	P12785	EC:1.1.1.100 /// EC:1.3.1.10 /// EC:2.3.1.38 /// EC:2.3.1.39 /// EC:2.3.1.41 /// EC:2.3.1.85 /// EC:3.1.2.14 /// EC:4.2.1.61	---	NP_059028	NM_017332	---	---	---	---	---	---	0006084 // acetyl-CoA metabolic process // inferred from direct assay /// 0006633 // fatty acid biosynthetic process // inferred from mutant phenotype /// 0006633 // fatty acid biosynthetic process // inferred from electronic annotation /// 0008152 // metabolic process // inferred from electronic annotation /// 0008610 // lipid biosynthetic process // traceable author statement /// 0008610 // lip…	0005625 // soluble fraction // inferred from direct assay /// 0005737 // cytoplasm // inferred from electronic annotation /// 0005737 // cytoplasm // not recorded /// 0005739 // mitochondrion // not recorded /// 0005794 // Golgi apparatus // not recorded /// 0005829 // cytosol // not recorded /// 0042470 // melanosome // inferred from electronic annotation /// 0042587 // glycogen granule // not r…	0000036 // acyl carrier activity // inferred from electronic annotation /// 0003824 // catalytic activity // inferred from electronic annotation /// 0004312 // fatty acid synthase activity // inferred from direct assay /// 0004312 // fatty acid synthase activity // inferred from mutant phenotype /// 0004312 // fatty acid synthase activity // inferred from electronic annotation /// 0004313 // [acy…	Fatty_Acid_Synthesis // GenMAPP
1367708_a_at	11.0548	11.3201	11.4206	11.077	12.0951	12.0252	12.0522	12.1039	P	P	P	P	P	P	P	P	Rat Expression Array 230 2.0	Rattus norvegicus	2011-06-09	Consensus sequence	GenBank	Rn.9486.1	gb:AI179334 /DB_XREF=gi:3729972 /DB_XREF=EST223030 /CLONE=RSPCF40 /FEA=FLmRNA /CNT=58 /TID=Rn.9486.1 /TIER=Stack /STK=17 /UG=Rn.9486 /LL=50671 /UG_GENE=Fasn /UG_TITLE=fatty acid synthase /FL=gb:M76767.1 gb:NM_017332.1	AI179334	Rn.9486	Rn.9486	November 2004 (Baylor College of Medicine HGSC Rnor3.4)	---	fatty acid synthase	Fasn	---	full length	---	50671	P12785	EC:1.1.1.100 /// EC:1.3.1.10 /// EC:2.3.1.38 /// EC:2.3.1.39 /// EC:2.3.1.41 /// EC:2.3.1.85 /// EC:3.1.2.14 /// EC:4.2.1.61	---	NP_059028	NM_017332	---	---	---	---	---	---	0006084 // acetyl-CoA metabolic process // inferred from direct assay /// 0006633 // fatty acid biosynthetic process // inferred from mutant phenotype /// 0006633 // fatty acid biosynthetic process // inferred from electronic annotation /// 0008152 // metabolic process // inferred from electronic annotation /// 0008610 // lipid biosynthetic process // traceable author statement /// 0008610 // lip…	0005625 // soluble fraction // inferred from direct assay /// 0005737 // cytoplasm // inferred from electronic annotation /// 0005737 // cytoplasm // not recorded /// 0005739 // mitochondrion // not recorded /// 0005794 // Golgi apparatus // not recorded /// 0005829 // cytosol // not recorded /// 0042470 // melanosome // inferred from electronic annotation /// 0042587 // glycogen granule // not r…	0000036 // acyl carrier activity // inferred from electronic annotation /// 0003824 // catalytic activity // inferred from electronic annotation /// 0004312 // fatty acid synthase activity // inferred from direct assay /// 0004312 // fatty acid synthase activity // inferred from mutant phenotype /// 0004312 // fatty acid synthase activity // inferred from electronic annotation /// 0004313 // [acy…	Fatty_Acid_Synthesis // GenMAPP
[truncated: 30,785 more rows]
[truncated: 7 more columns]

## Sheet: present_calls
probeset	Woo010008_9_A1.expr	Woo010009_9_A2.expr	Woo010010_9_A3.expr	Woo010011_9_A4.expr	Woo010000_N_A1.expr	Woo010001_N_A2.expr	Woo010002_N_A3.expr	Woo010003_N_A4.expr	Clone9_orig.mean	N1S1_orig.mean	FC	ratio	ttest_pval	GeneChip Array	Species Scientific Name	Annotation Date	Sequence Type	Sequence Source	Transcript ID(Array Design)	Target Description	Representative Public ID	Archival UniGene Cluster	UniGene ID	Genome Version	Alignments	Gene Title	Gene Symbol	Chromosomal Location	Unigene Cluster Type	Ensembl	Entrez Gene	SwissProt	EC	OMIM	RefSeq Protein ID	RefSeq Transcript ID	FlyBase	AGI	WormBase	MGI Name	RGD Name	SGD accession number	Gene Ontology Biological Process	Gene Ontology Cellular Component	Gene Ontology Molecular Function	Pathway	InterPro	Trans Membrane	QTL
[truncated: 20,411 more rows]
[truncated: 4 more columns]

## Sheet: FilteredList_p<0.05
probeset	Woo010008_9_A1.expr	Woo010009_9_A2.expr	Woo010010_9_A3.expr	Woo010011_9_A4.expr	Woo010000_N_A1.expr	Woo010001_N_A2.expr	Woo010002_N_A3.expr	Woo010003_N_A4.expr	Clone9_orig.mean	N1S1_orig.mean	FC	ratio	ttest_pval	GeneChip Array	Species Scientific Name	Annotation Date	Sequence Type	Sequence Source	Transcript ID(Array Design)	Target Description	Representative Public ID	Archival UniGene Cluster	UniGene ID	Genome Version	Alignments	Gene Title	Gene Symbol	Chromosomal Location	Unigene Cluster Type	Ensembl	Entrez Gene	SwissProt	EC	OMIM	RefSeq Protein ID	RefSeq Transcript ID	FlyBase	AGI	WormBase	MGI Name	RGD Name	SGD accession number	Gene Ontology Biological Process	Gene Ontology Cellular Component	Gene Ontology Molecular Function	Pathway	InterPro	Trans Membrane	QTL
[truncated: 14,995 more rows]
[truncated: 4 more columns]

[truncated: 2 more sheets: FilteredList_p<0.05_FC|1.5|, FilteredList_p<0.05_FC|2|]
